# Supplementary material for: Acid-labile δ-ketal-β-hydroxy esters by asymmetric hydrogenation of corresponding δ-ketal-β-keto esters in the presence of CaCO3
Source: Royal Society of Chemistry journal article supplement (doi:10.1039/c2cc31002c), 2012-01-01

## *Supporting Information*

### **Acid-Labile $\delta$ -Ketal- $\beta$ -Hydroxy Esters by Asymmetric Hydrogenation of Corresponding $\delta$ -Ketal- $\beta$ -Keto Esters in the Presence of $\text{CaCO}_3^\dagger$**

Weizheng Fan,<sup>a</sup> Wanfang Li,<sup>a</sup> Xin Ma,<sup>a</sup> Xiaoming Tao,<sup>a</sup> Xiaoming Li,<sup>a</sup> Ying Yao,<sup>a</sup> Xiaomin Xie,<sup>a</sup> and Zhaoguo Zhang<sup>\*a,b</sup>

<sup>a</sup> *School of Chemistry and Chemical Engineering, Shanghai Jiao Tong University, 800 Dongchuan Road, Shanghai 200240, China.*

<sup>b</sup> *Shanghai Institute of Organic Chemistry, 345 Lingling Road, Shanghai 200032, China.*

*zhaoguo@sjtu.edu.cn*

### **Contents**

|                                                                                        |            |
|----------------------------------------------------------------------------------------|------------|
| <b>1. General method.....</b>                                                          | <b>S2</b>  |
| <b>2. Preparation of <math>\delta</math>-ketal-<math>\beta</math>-keto esters.....</b> | <b>S2</b>  |
| <b>3. Typical procedure for asymmetric hydrogenation.....</b>                          | <b>S8</b>  |
| <b>4. Preparation of the corresponding derivatives of 2a-f.....</b>                    | <b>S12</b> |
| <b>5. Synthesis of <math>\delta</math>-keto-<math>\beta</math>-hydroxy esters.....</b> | <b>S14</b> |
| <b>6. HPLC chromatography of the hydrogenation products.....</b>                       | <b>S17</b> |
| <b>7. NMR spectra of the products.....</b>                                             | <b>S33</b> |

## 1. General method:

All reactions were carried out under an atmosphere of nitrogen using standard Schlenk techniques or in a nitrogen-filled glove box, unless otherwise noted. Commercially available reagents were used throughout without further purification other than those detailed below. Anhydrous MeOH and EtOH were freshly distilled from Mg. Anhydrous i-PrOH and CH<sub>2</sub>Cl<sub>2</sub> were freshly distilled from calcium hydride. <sup>1</sup>H NMR and <sup>13</sup>C NMR spectra were recorded on a 400 MHz spectrometer. The chemical shifts for <sup>1</sup>H NMR were recorded in ppm downfield from tetramethylsilane (TMS) with the solvent resonance as the internal standard. The chemical shifts for <sup>13</sup>C NMR were recorded in ppm downfield using the central peak of deuteriochloroform (77.00 ppm) as the internal standard. Coupling constants (J) are reported in Hz and refer to apparent peak multiplications. HRMS were recorded on APEXII and ZAB-HS spectrometer. Flash column chromatography was performed on silica gel (300-400 mesh). [α]<sub>D</sub> values are given in deg cm<sup>2</sup> g<sup>-1</sup> and were recorded at the D line of sodium (589 nm) in a 0.05 dm cell.

## 2. Preparation of ε-substituted δ-ketal-β-keto esters:<sup>[1-2]</sup>

### 2.1 Synthesis of ε-substituted δ-ketal-β-keto esters 1a-h.

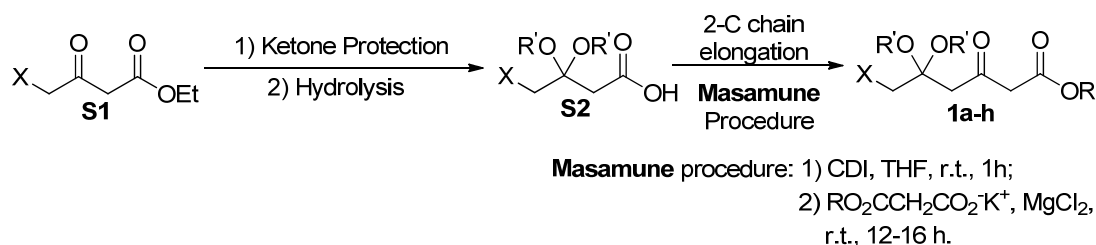

The synthesis of ε-substituted δ-ketal-β-keto esters **1a-h** was accomplished via a three-step sequence as shown above. Protection of carbonyl groups of β-keto esters **S1** with ethylene alcohol, methanol or ethanol in the presence of an acid as the catalyst produced different β-ketal esters,<sup>[3-4]</sup> which were hydrolyzed into their corresponding acids **S2**. The acids **S2** were further converted to ε-substituted δ-ketal-β-keto esters **1a-h** by Masamune procedure.

### 2.1.2 Typical synthetic procedures for preparation of methyl 6-chloro-5,5-diethoxy-3-oxohexanoate **1a**

#### A. Synthesis of 4-chloro-3,3-diethoxybutanoic acid **S2a**

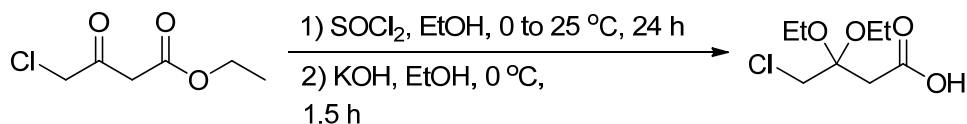

Under  $\text{N}_2$  at 0 °C,  $\text{SOCl}_2$  (15.2 g, 128 mmol) was dropwise added to anhydrous EtOH (30 mL) over 20 min, followed by ethyl 4-chloroacetoacetate (20.0 g, 122 mmol). The mixture was allowed to warm to RT and stirred for 24 h. After the removal of volatile materials under reduced pressure, 91 mL of 2 M potassium hydroxide (aq.) was added to the solution of the residue in EtOH (100 mL) at 0 °C and the mixture was stirred for 1.5 h at RT. The resultant reaction mixture was concentrated under reduced pressure, and the aqueous phase was washed with diethyl ether (30 mL x 2). The aqueous phase was acidified to pH = 3 with 2 M HCl (aq.), followed by extraction with  $\text{CH}_2\text{Cl}_2$  (50 mL x 3). The combined organic phase was washed with saturated NaCl (aq.) (30 ml) and dried over  $\text{Na}_2\text{SO}_4$ , concentrated in vacuo to give crude 4-chloro-3,3-dimethoxybutanoic acid **S2a**, which was directly used in the subsequent reaction without further purification.

#### B. Preparation of methyl 6-Chloro-5,5-diethoxy-3-oxohexanoate **1a**

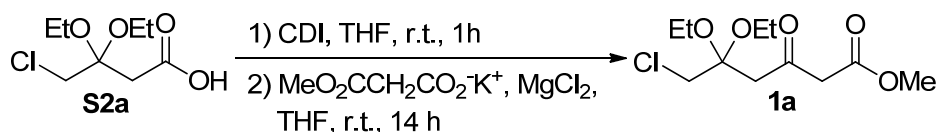

To a solution of crude 4-chloro-3,3-diethoxybutanoic acid **S2a** (20.6 g, 98 mmol) in THF (100 mL) was added *N,N'*-carbonyldiimidazole (19.1 g, 118 mmol) and the resulting solution was stirred at RT for 1 h. Treatment of potassium monoethyl malonate (18.4 g, 118 mmol) with magnesium chloride (14.0 g, 147 mmol) at RT for 30 min, generated the dianion as its magnesium chelate. To this solution was added the imidazolide solution, and a gummy precipitate began to form immediately. After the resulting mixture was stirred at RT for 14 h, the reaction was poured into ice-cold 1 M HCl. Extraction with EtOAc (100 mL x 2) followed by washing the combined organics with saturated  $\text{NaHCO}_3$  (50 mL x 2) and brine (50 mL) and drying over  $\text{MgSO}_4$ . Evaporation of the solvent gave the crude product, which was further purified by silica-gel column chromatography with petroleum ether and ethyl acetate (6:1) as eluent. Likewise, **1e** and **1f** were synthesized using the same procedure.

#### 2.1.2 Typical synthetic procedures for preparation of methyl 4-(2-(chloromethyl)-1,3-dioxolan-2-yl)-3-oxobutanoate **1b**

##### A. Preparation of 2-(2-(chloromethyl)-1,3-dioxolan-2-yl)acetic acid **S2b**

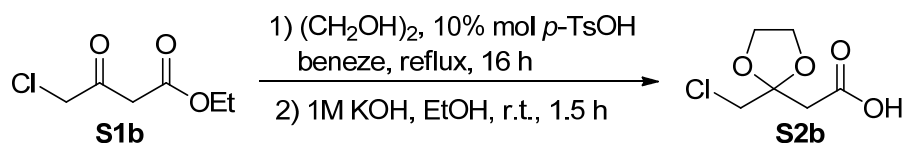

A mixture of ethyl 4-chloroacetoacetate (20.0 g, 122 mmol), ethylene glycol (11.3 g, 182 mmol) and tosylic acid (1.2 g, 6 mmol) in benzene (80 mL) was heated under reflux with a Dean-Stark apparatus for 16 hours to remove water. After the ethyl 4-chloroacetoacetate was completely consumed, benzene was evaporated under vacuum, followed by addition of saturated aqueous NaHCO<sub>3</sub> solution (30 mL), and then the reaction mixture was extracted with ethyl acetate (50 mL x 2). The ethyl acetate layer was washed with saturated aqueous solution of sodium chloride (30 mL), dried over anhydrous MgSO<sub>4</sub>, concentrated in vacuum to give the crude product, which was dissolved in EtOH (100 mL), and to the solution was dropwise added 91 mL of 2 M potassium hydroxide (aq.). After stirring for 1.5 h at RT, the resultant reaction mixture was concentrated under reduced pressure, and the aqueous phase was washed with dimethyl ether (30 mL x 2). The aqueous phase was acidified to pH = 3 with 2 M HCl (aq.), followed by extraction with CH<sub>2</sub>Cl<sub>2</sub> (50 mL x 3). The combined organic phase was washed with saturated NaCl (aq.) (30 mL) and dried over Na<sub>2</sub>SO<sub>4</sub>, concentrated in vacuo to give the 2-(2-(chloromethyl)-1,3-dioxolan-2-yl)acetic acid **S2b**, which was directly used in the subsequent reaction without further purification.

#### B. Preparation of methyl 4-(2-(chloromethyl)-1,3-dioxolan-2-yl)-3-oxobutanoate **1b**

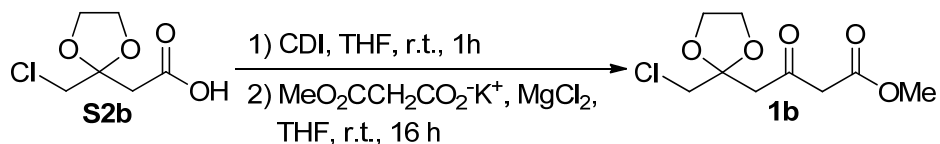

To a solution of crude 2-(2-(chloromethyl)-1,3-dioxolan-2-yl)acetic acid **S2b** (17.6 g, 97 mmol) in THF (80 mL) was added *N,N'*-carbonyldiimidazole (19.0 g, 117 mmol) and the resulting solution was stirred at RT for 1 h. Treatment of potassium monoethyl malonate (18.3 g, 117 mmol) with magnesium chloride (13.9 g, 146 mmol) at RT for 30 min, generated the dianion as its magnesium chelate. To this solution was added the imidazolide solution, and a gummy precipitate began to form immediately. After the resulting mixture was stirred at RT for 16 h, the reaction was poured into ice-cold 1 M HCl. Extraction with EtOAc (100 mL x 2) followed by washing the combined organics with saturated NaHCO<sub>3</sub> (50 mL x 2) and brine (50 mL) and drying over MgSO<sub>4</sub>. Evaporation of the solvent gave the crude product, which was purified by silica-gel column chromatography using petroleum ether and ethyl acetate (10/1 - 5/1) as the eluent.

Likewise, **1c**, **1d** and **1g-1i** were synthesized as the same procedure.

### 2.1.3 Preparation of *tert*-butyl 4-(2-((benzyloxy)methyl)-1,3-dioxolan-2-yl)-3-oxobutanoate **1i**<sup>[1]</sup>

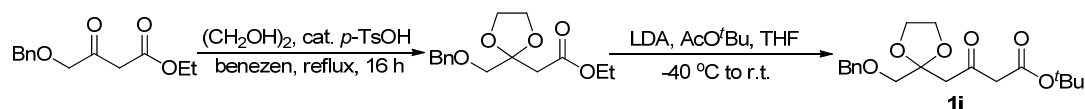

#### A. Synthesis of ethyl 2-(2-((benzyloxy)methyl)-1,3-dioxolan-2-yl)acetate

A mixture of ethyl 4-(benzyloxy)-3-oxobutanoate (5.0 g, 21 mmol), ethylene glycol (2.0 g, 32 mmol) and tosylic acid (182 mg, 1 mmol) in benzene (50 mL) was heated under reflux under Dean-Stark apparatus for 16 hours. After the ethyl 4-(benzyloxy)-3-oxobutanoate was completely consumed, benzene was evaporated under vacuum, followed by addition of saturated aqueous NaHCO<sub>3</sub> solution (20 mL), and then the reaction mixture was extracted with ethyl acetate (50 mL x 2). The ethyl acetate layer was washed with saturated aqueous solution of sodium chloride (30 mL), dried over anhydrous MgSO<sub>4</sub>, concentrated in vacuum to give the crude ethyl 2-(2-((benzyloxy)methyl)-1,3-dioxolan-2-yl)acetate, which was directly used in the subsequent reaction without further purification.

#### B. Synthesis of *tert*-butyl 4-(2-((benzyloxy)methyl)-1,3-dioxolan-2-yl)-3-oxobutanoate **1i**

A 2.4 M solution of *n*-BuLi (30 mL, 71 mmol) was added at -10 °C within 10 min to a solution of *i*Pr<sub>2</sub>NH (7.4 g, 73 mmol) in THF (100 mL). The resulting mixture was stirred 10 min at 0 °C, and *tert*-butyl acetate (7.1 g, 61 mmol) was added dropwise within 20 min at -40 °C. A solution of crude ethyl 2-(2-((benzyloxy)methyl)-1,3-dioxolan-2-yl)acetate (5.7 g, 20 mmol) in THF (30 mL) was added dropwise within 20 min at -40 °C, and the mixture was stirred for 40 min at -40 °C. After completion of the reaction, saturated NH<sub>4</sub>Cl (aq.) (50 mL) was added to the reaction mixture (without cooling) within 10 min, leading to an inner temperature of 0 °C. The mixture was concentrated via rotary evaporation and diluted with EtOAc (50 mL), the layers were separated and the aqueous layer was extracted with EtOAc (40 mL x 2) and the combined organic layers were washed with sat. NaCl (aq.) (80 mL) and dried over anhydrous Na<sub>2</sub>SO<sub>4</sub>, followed concentrated *in vacuo*. The residue was purified by silica gel chromatography with petroleum ether and ethyl acetate (7:1) as eluent.

#### Methyl 6-chloro-5,5-diethoxy-3-oxohexanoate, **1a**

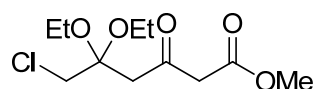

White solid, 62% yield (from ethyl 4-chloroacetoacetate). Mixture of keto and enol forms:  
<sup>1</sup>H NMR (400 MHz, CDCl<sub>3</sub>) δ 12.08 (s, 0.70H), 5.16 (s, 0.81H), 3.74 (s, 3H), 3.65 (s, 2H),

3.63 – 3.50 (m, 4H), 2.74 (s, 2H), 1.20 (t,  $J = 7.1$  Hz, 6H).  $^{13}\text{C}$  NMR (100 MHz,  $\text{CDCl}_3$ )  $\delta$  199.0, 173.0, 172.7, 167.4, 100.4, 99.9, 91.7, 56.4, 52.1, 51.1, 49.9, 45.4, 44.2, 43.5, 37.8, 14.84, 14.78. HRMS-ESI (m/z): Calculated for  $[\text{C}_{11}\text{H}_{19}\text{ClO}_5\text{Na}]^+$ : 289.0813, found: 289.0823.

#### Methyl 4-(2-(chloromethyl)-1,3-dioxolan-2-yl)-3-oxobutanoate, 1b

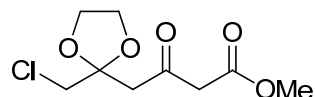

Colorless oil, 63% yield (from ethyl 4-chloroacetoacetate). Mixture of keto and enol forms:  $^1\text{H}$  NMR (400 MHz,  $\text{CDCl}_3$ )  $\delta$  12.08 (s, 0.12H), 5.15 (s, 0.15H), 4.08 – 4.04 (m, 4H), 3.75 (s, 3H), 3.62 (s, 2H), 3.56 (s, 2H), 3.08 (s, 2H), 2.70 (s, 0.36H).  $^{13}\text{C}$  NMR (100 MHz,  $\text{CDCl}_3$ )  $\delta$  198.8, 167.2, 107.4, 92.3, 65.8, 65.6, 52.2, 51.1, 50.3, 47.4, 46.9, 46.6, 41.4. HRMS-ESI (M/Z)-ESI (m/z): Calculated for  $[\text{C}_9\text{H}_{13}\text{ClO}_5\text{Na}]^+$ : 259.0344, found: 259.0356.

#### Ethyl 4-(2-Methyl 4-(2-methyl-1,3-dioxolan-2-yl)-3-oxobutanoate, 1c

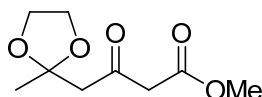

Colorless oil, 48% yield (from methyl 3-oxobutanoate). Mixture of keto and enol forms:  $^1\text{H}$  NMR (400 MHz,  $\text{CDCl}_3$ )  $\delta$  12.05 (s, 0.11H), 5.11 (s, 0.10H), 3.99 – 3.97 (m, 4H), 3.74 (s, 3H), 3.58 (s, 2H), 2.89 (s, 2H), 2.53 (s, 0.28H), 1.44 (s, 0.54H), 1.40 (s, 3H).  $^{13}\text{C}$  NMR (100 MHz,  $\text{CDCl}_3$ )  $\delta$  199.9, 173.3, 167.6, 107.6, 91.7, 64.7, 64.5, 52.2, 51.6, 51.1, 50.0, 44.5, 24.4, 24.2. HRMS-ESI (m/z): Calculated for  $[\text{C}_9\text{H}_{14}\text{O}_5\text{Na}]^+$ : 225.0733, found: 225.0744.

#### Methyl 4-(2-ethyl-1,3-dioxolan-2-yl)-3-oxobutanoate, 1d

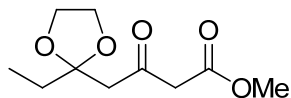

Pale yellow oil, 48% yield (from methyl 3-oxobutanoate). Mixture of keto and enol forms:  $^1\text{H}$  NMR (400 MHz,  $\text{CDCl}_3$ )  $\delta$  12.05 (s, 0.11H), 5.10 (s, 0.10H), 4.02 – 3.94 (m, 4H), 3.73 (s, 2H), 3.59 (s, 2H), 2.86 (s, 2H), 2.51 (s, 0.28H), 1.71 (q,  $J = 7.4$  Hz, 2H), 0.92 (t,  $J = 7.4$  Hz, 3H).  $^{13}\text{C}$  NMR (100 MHz,  $\text{CDCl}_3$ )  $\delta$  200.1, 167.5, 110.1, 109.7, 91.5, 65.0, 64.8, 52.0, 50.9, 49.9, 49.4, 42.5, 30.6, 30.3, 7.6. HRMS-ESI (m/z): Calculated for  $[\text{C}_{17}\text{H}_{22}\text{O}_6\text{Na}]^+$ : 239.0895, found: 239.0875.

#### Ethyl 6-chloro-5,5-diethoxy-3-oxohexanoate, 1e

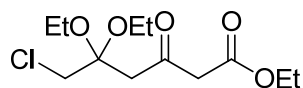

White solid, 60% yield (from ethyl 4-chloroacetoacetate). Mixture of keto and enol forms:  $^1\text{H}$  NMR (400 MHz,  $\text{CDCl}_3$ )  $\delta$  12.18 (s, 0.27H), 5.15 (s, 0.27H), 4.20 (q,  $J = 7.1$  Hz, 2H), 3.72 (s, 1.46H), 3.65 (s, 0.62H), 3.64 – 3.56 (m, 1H), 3.55 – 3.47 (m, 5H), 3.09 (s, 1.50H), 2.73 (s, 0.62H), 1.31 – 1.27 (m, 3H), 1.22 – 1.18 (m, 6H).  $^{13}\text{C}$  NMR (100 MHz,  $\text{CDCl}_3$ )  $\delta$  199.1, 172.9, 172.4, 167.0, 100.5, 99.9, 92.1, 61.3, 60.1, 56.4, 50.3, 45.4, 44.3, 43.5, 37.8, 14.92, 14.87, 14.1, 14.0. HRMS-ESI ( $m/z$ ): Calculated for  $[\text{C}_{12}\text{H}_{21}\text{ClO}_5\text{Na}]^+$ : 303.0970, found: 303.0981.

#### Methyl 6-chloro-5,5-dimethoxy-3-oxohexanoate, 1f

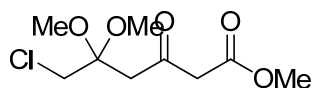

Colorless oil, 56% yield (from ethyl 4-chloroacetoacetate). Mixture of keto and enol forms:  $^1\text{H}$  NMR (400 MHz,  $\text{CDCl}_3$ )  $\delta$  12.10 (s, 0.16H), 5.17 (s, 0.17H), 3.74 (s, 3H), 3.72 (s, 1.58H), 3.64 (s, 0.44H), 3.55 (s, 1.42H), 3.29 (s, 1.35H), 3.25 (s, 4.64H), 3.07 (s, 1.59H), 2.72 (s, .43H).  $^{13}\text{C}$  NMR (100 MHz,  $\text{CDCl}_3$ )  $\delta$  198.7, 172.7, 167.4, 100.3, 92.0, 52.3, 51.2, 50.1, 48.7, 48.6, 44.4, 43.4, 42.8, 37.1. HRMS-ESI ( $M/Z$ ): Calculated for  $[\text{C}_9\text{H}_{15}\text{ClO}_5\text{Na}]^+$ : 261.0500, found: 261.0509.

#### Methyl 4-(2-((benzyloxy)methyl)-1,3-dioxolan-2-yl)-3-oxobutanoate, 1g

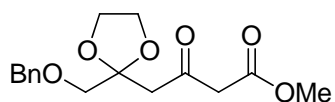

Colorless oil, 54% yield (from ethyl 4-(benzyloxy)-3-oxobutanoate). Mixture of keto and enol forms:  $^1\text{H}$  NMR (400 MHz,  $\text{CDCl}_3$ )  $\delta$  12.05 (s, 0.09H), 7.36 – 7.26 (m, 5H), 5.12 (s, 0.12H), 4.61 (s, 0.37H), 4.57 (s, 2H), 4.03 – 3.96 (m, 4H), 3.73 (s, 0.38H), 3.72 (s, 3H), 3.67 (s, 0.10H), 3.58 (s, 2H), 3.50 (s, 0.29H), 3.47 (s, 2H), 2.98 (s, 2H), 2.66 (s, 0.29H).  $^{13}\text{C}$  NMR (100 MHz,  $\text{CDCl}_3$ )  $\delta$  199.5, 167.6, 137.6, 128.3, 127.6 (2C), 108.4, 107.9, 91.9, 73.5, 72.1, 72.0, 65.4, 65.2, 52.1, 51.1, 50.2, 48.1, 40.8. HRMS-ESI ( $m/z$ ): Calculated for  $[\text{C}_{16}\text{H}_{20}\text{O}_6\text{Na}]^+$ : 331.1158, found: 331.1131.

#### Ethyl 4-(2-((benzyloxy)methyl)-1,3-dioxolan-2-yl)-3-oxobutanoate, 1h

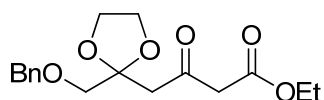

Colorless oil, 57% yield (from ethyl 4-(benzyloxy)-3-oxobutanoate). Mixture of keto and enol forms:  $^1\text{H}$  NMR (400 MHz,  $\text{CDCl}_3$ )  $\delta$  12.14 (s, 0.09H), 7.66 – 7.27 (m, 5H), 5.10 (s, 0.10H), 4.61 (d,  $J = 2.7$  Hz, 0.42H), 4.57 (s, 2H), 4.18 (q,  $J = 7.1$  Hz, 2H), 4.03 – 3.96 (m, 4H), 3.58 (s, 0.17H), 3.56 (s, 1.39H), 3.50 (s, 0.26H), 3.47 (s, 1.58H), 2.98 (s, 1.56H), 2.80 (s, 0.15H), 2.65 (s, 0.24H), 1.26 (t,  $J = 7.2$  Hz, 3H).  $^{13}\text{C}$  NMR (100 MHz,  $\text{CDCl}_3$ )  $\delta$  199.7, 167.3, 137.7, 128.3, 127.7 (2C), 108.0, 92.3, 73.5, 72.2, 72.0, 65.4, 65.2, 61.2, 50.5, 48.1, 40.9, 14.1. HRMS-ESI ( $m/z$ ): Calculated for  $[\text{C}_{17}\text{H}_{22}\text{O}_6\text{Na}]^+$ : 345.1314, found: 345.1303.

***tert*-Butyl 4-(2-((benzyloxy)methyl)-1,3-dioxolan-2-yl)-3-oxobutanoate, 1i**

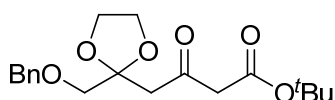

Pale yellow oil, 86% yield (from ethyl 4-(benzyloxy)-3-oxobutanoate). Mixture of keto and enol forms:  $^1\text{H}$  NMR (400 MHz,  $\text{CDCl}_3$ )  $\delta$  12.27 (s, 0.08H), 7.37 – 7.27 (m, 5H), 5.00 (s, 0.08H), 4.61 (s, 0.23H), 4.57 (s, 2H), 4.01 – 3.98 (m, 4H), 3.48 (s, 2H), 3.46 (s, 2H), 2.97 (s, 2H), 2.61 (s, 0.18H), 1.49 (s, 0.85H), 1.46 (s, 9H).  $^{13}\text{C}$  NMR (100 MHz,  $\text{CDCl}_3$ )  $\delta$  200.1, 166.4, 137.6, 128.2, 127.6 (2C), 107.9, 93.6, 81.6, 73.4, 72.0, 65.3, 65.1, 51.7, 47.7, 40.9, 28.1, 27.8. HRMS-ESI ( $m/z$ ): Calculated for  $[\text{C}_{19}\text{H}_{26}\text{O}_6\text{Na}]^+$ : 373.1622, found: 373.1636.

### 3. Typical procedure for asymmetric hydrogenation

**General procedure (substrate/catalyst = 250/1):** To a 20 mL Schlenk tube were added  $[\text{Ru}(\text{benzene})\text{Cl}_2]_2$  (10 mg, 0.020 mmol) and (*S*)-SunPhos (30 mg, 0.044 mmol). The tube was vacuumed and purged with nitrogen three times before addition of freshly distilled and degassed EtOH / DCM (3 mL / 3 mL). The resulting mixture was heated at 50 °C for 1 h and then cooled to RT. The solvent was removed under vacuum to give the catalyst. This catalyst was dissolved in degassed ethanol (10 mL), and distributed equally to four vials. The  $\beta$ -keto esters (1.25 mmol) and  $\text{CaCO}_3$  (12 mg) were added to these vials, respectively, and were transferred to an autoclave. The autoclave was purged with  $\text{H}_2$  three times, and the pressure of  $\text{H}_2$  was set to 60 bar. Then the autoclave was stirred for 4.5 h, and the autoclave was then cooled to RT and the  $\text{H}_2$  was carefully released. The autoclave was opened and the ethanol was evaporated. The enantiomeric excess was determined by HPLC after passing the residue through a short pad of silica gel column with petroleum ether and ethyl acetate.

**Methyl 6-chloro-5,5-diethoxy-3-hydroxyhexanoate, 2a**



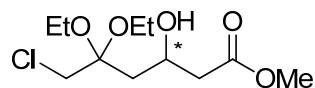

Colorless oil, 97% yield, 99.2% ee,  $[\alpha]_D^{20} = +11.3$  ( $c = 0.97$  CH<sub>2</sub>Cl<sub>2</sub>). <sup>1</sup>H NMR (400 MHz, CDCl<sub>3</sub>)  $\delta$  4.33 – 4.26 (m, 1H), 3.78 (d,  $J = 11.8$  Hz, 1H), 3.72 (s, 3H), 3.62 – 3.47 (m, 6H), 2.57 – 2.45 (m, 2H), 2.09 (dd,  $J = 14.9, 9.9$  Hz, 1H), 1.93 (dd,  $J = 14.9, 2.1$  Hz, 1H), 1.22 – 1.18 (m, 6H). <sup>13</sup>C NMR (100 MHz, CDCl<sub>3</sub>)  $\delta$  172.1, 101.3, 64.5, 56.3, 56.2, 51.6, 44.6, 41.8, 38.6, 15.0. HRMS-ESI ( $m/z$ ): Calculated for [C<sub>11</sub>H<sub>21</sub>O<sub>5</sub>ClNa]<sup>+</sup>: 291.0975, found: 291.0956. The enantiomeric excess was determined via its corresponding 4-chlorobenzethiol substituted derivative **4a** (deprotection of **2a** and then substituted with 4-chlorobenzethiol) by HPLC on chiralcel OB-H column, hexane: isopropanol = 60:40, flow rate = 0.7 mL/min, UV detection at 254 nm,  $t_R = 23.9$  min (minor), 26.1 min (major).

#### Methyl 4-(2-(chloromethyl)-1,3-dioxolan-2-yl)-3-hydroxybutanoate, **2b**

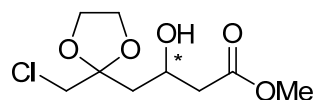

Colorless oil, 95% yield, 99.7% ee,  $[\alpha]_D^{20} = +2.1$  ( $c = 0.77$  CH<sub>2</sub>Cl<sub>2</sub>). <sup>1</sup>H NMR (400 MHz, CDCl<sub>3</sub>)  $\delta$  4.37 – 4.30 (m, 1H), 4.11 – 4.07 (m, 4H), 3.71 (s, 3H), 3.57 (d,  $J = 1.6$  Hz, 2H), 3.36 (d,  $J = 2.3$  Hz, 1H), 2.57 – 2.46 (m, 2H), 2.04 – 2.03 (m, 2H). <sup>13</sup>C NMR (100 MHz, CDCl<sub>3</sub>)  $\delta$  172.0, 108.9, 65.5, 65.3, 64.2, 51.6, 46.5, 41.5, 40.8. HRMS-ESI ( $m/z$ ): Calculated for [C<sub>9</sub>H<sub>16</sub>O<sub>5</sub>ClNa]<sup>+</sup>: 239.0686, found: 239.0683. The enantiomeric excess was determined via its corresponding 4-nitrobenzoate **3b** by HPLC on chiralcel AD-H column, hexane: isopropanol = 75:25, flow rate = 0.6 mL/min, UV detection at 254 nm,  $t_R = 42.5$  min (major), 46.3 min (minor).

#### Methyl 3-hydroxy-4-(2-methyl-1,3-dioxolan-2-yl)butanoate, **2c**

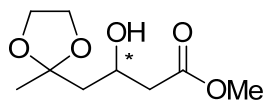

Colorless oil, 79% yield, 99.3% ee,  $[\alpha]_D^{20} = +4.4$  ( $c = 1.08$  CH<sub>2</sub>Cl<sub>2</sub>). <sup>1</sup>H NMR (400 MHz, CDCl<sub>3</sub>): 4.38 – 4.34 (m, 1H), 4.03 – 3.98 (m, 4H), 3.78 – 3.66 (m, 4H), 2.57 – 2.43 (m, 2H), 1.92 – 1.85 (m, 2H), 1.43 – 1.36 (m, 3H). <sup>13</sup>C NMR (100 MHz, CDCl<sub>3</sub>): 172.0, 109.6, 64.8, 64.4, 64.1, 51.5, 44.2, 41.6, 23.9. HRMS-ESI ( $m/z$ ): Calculated for [C<sub>9</sub>H<sub>16</sub>O<sub>5</sub>ClNa]<sup>+</sup>: 227.0895, found: 227.0879. The enantiomeric excess was determined via its corresponding *p*-nitrobenzoate **4c** by HPLC on chiralcel OD-H column, hexane: isopropanol = 85:15, flow rate = 0.6 mL/min, UV detection at 254 nm,  $t_R = 32.7$  min (minor), 36.2 min (major).

### Methyl 4-(2-ethyl-1,3-dioxolan-2-yl)-3-hydroxybutanoate, **2d**

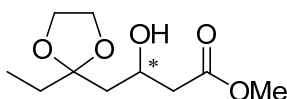

Colorless oil, 81% yield, 99.5% ee,  $[\alpha]_D^{20} = +5.2$  ( $c = 1.19$  CH<sub>2</sub>Cl<sub>2</sub>). <sup>1</sup>H NMR (400 MHz, CDCl<sub>3</sub>)  $\delta$  4.36 – 4.29 (m, 1H), 4.04 – 3.95 (m, 4H), 3.73 (s, 1H), 3.71 (s, 3H), 2.56 – 2.42 (m, 2H), 1.90 – 1.79 (m, 2H), 1.73 – 1.66 (m, 2H), 0.92 (t,  $J = 7.5$  Hz, 3H). <sup>13</sup>C NMR (100 MHz, CDCl<sub>3</sub>)  $\delta$  171.9, 111.7, 64.6, 64.4, 51.4, 41.7, 41.5, 29.8, 7.8. HRMS-ESI ( $m/z$ ): Calculated for [C<sub>10</sub>H<sub>18</sub>O<sub>5</sub>ClNa]<sup>+</sup>: 241.1052, found: 241.1022. The enantiomeric excess was determined via its corresponding *p*-nitrobenzoate **4d** by HPLC on chiralcel AS-H column, hexane: isopropanol = 80:20, flow rate = 0.55 mL/min, UV detection at 254 nm,  $t_R = 23.8$  min (major), 26.5 min (minor).

### Ethyl 6-chloro-5,5-diethoxy-3-hydroxyhexanoate, **2e**

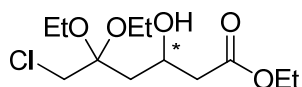

Colorless oil, 95% yield, 99.4% ee,  $[\alpha]_D^{20} = +10.0$  ( $c = 1.16$  CH<sub>2</sub>Cl<sub>2</sub>). <sup>1</sup>H NMR (400 MHz, CDCl<sub>3</sub>)  $\delta$  4.31 – 4.25 (m, 1H), 4.21 – 4.13 (m, 2H), 3.80 (d,  $J = 11.9$  Hz, 1H), 3.63 – 3.46 (m, 6H), 2.56 – 2.43 (m, 2H), 2.09 (dd,  $J = 15.0, 9.9$  Hz, 1H), 1.92 (dd,  $J = 15.0, 2.2$  Hz, 1H), 1.29 – 1.18 (m, 9H). <sup>13</sup>C NMR (100 MHz, CDCl<sub>3</sub>)  $\delta$  171.8, 101.2, 64.5, 60.5, 56.3, 56.2, 44.6, 42.1, 38.6, 15.0, 14.0. HRMS-ESI ( $m/z$ ): Calculated for [C<sub>12</sub>H<sub>23</sub>O<sub>5</sub>ClNa]<sup>+</sup>: 305.1132, found: 305.1095. The enantiomeric excess was determined via its corresponding 4-chlorobenzenthiole substituted derivative **4e** (deprotection of **2e** and then substituted with 4-chlorobenzenthiole) by HPLC on chiralcel OB-H column, hexane: isopropanol = 65:35, flow rate = 0.6 mL/min, UV detection at 254 nm,  $t_R = 19.8$  min (minor), 23.4 min (major).

### Methyl 6-chloro-3-hydroxy-5,5-dimethoxyhexanoate, **2f**

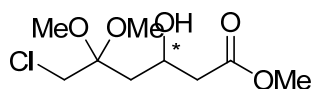

Colorless oil, 91% yield, 99.2% ee,  $[\alpha]_D^{20} = +11.6$  ( $c = 1.02$  CH<sub>2</sub>Cl<sub>2</sub>). <sup>1</sup>H NMR (400 MHz, CDCl<sub>3</sub>)  $\delta$  4.27 (m, 1H), 3.79 (d,  $J = 12.0$  Hz, 1H), 3.72 (s, 3H), 3.59 (d,  $J = 12.0$  Hz, 1H), 3.30 (d,  $J = 2.9$  Hz, 1H), 3.28 (s, 3H), 3.25 (s, 3H), 2.58 – 2.46 (m, 2H), 2.08 (dd,  $J = 15.1, 9.9$  Hz, 1H), 1.90 (dd,  $J = 15.1, 2.2$  Hz, 1H). <sup>13</sup>C NMR (100 MHz, CDCl<sub>3</sub>)  $\delta$  172.3, 101.4, 64.3, 51.6, 48.4, 43.7, 41.8, 37.6. HRMS-ESI ( $m/z$ ): Calculated for [C<sub>9</sub>H<sub>17</sub>O<sub>5</sub>ClNa]<sup>+</sup>: 263.0662, found: 263.0638. The enantiomeric excess was determined via its corresponding 4-

chlorobenzethiol substituted derivative **4f** (deprotection of **2f** and then substituted with 4-chlorobenzethiol) by HPLC on chiralcel OB-H column, hexane: isopropanol = 60:40, flow rate = 0.7 mL/min, UV detection at 254 nm,  $t_R$  = 21.7 min (minor), 25.0 min (major).

#### Methyl 4-(2-((benzyloxy)methyl)-1,3-dioxolan-2-yl)-3-hydroxybutanoate, **2g**

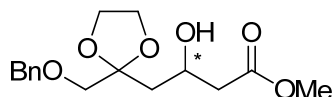

Colorless oil, 93% yield, 99.2% ee,  $[\alpha]_D^{20} = +0.7$  ( $c = 1.07$  CH<sub>2</sub>Cl<sub>2</sub>). <sup>1</sup>H NMR (400 MHz, CDCl<sub>3</sub>)  $\delta$  7.38 – 7.25 (m, 5H), 4.63 – 4.56 (m, 2H), 4.38 – 4.32 (m, 1H), 4.05 – 4.00 (m, 1H), 3.70 (s, 3H), 3.59 (d,  $J = 1.5$  Hz, 1H), 3.48 – 3.41 (m, 2H), 2.56 – 2.48 (m, 2H), 2.02 – 1.92 (m, 2H). <sup>13</sup>C NMR (100 MHz, CDCl<sub>3</sub>)  $\delta$  172.1, 137.7, 128.3, 127.7, 127.6, 109.6, 73.5, 71.9, 65.3, 65.0, 64.5, 51.6, 41.9, 40.9. HRMS-ESI ( $m/z$ ): Calculated for [C<sub>16</sub>H<sub>22</sub>O<sub>6</sub>ClNa]<sup>+</sup>: 333.1314, found: 333.1292. The enantiomeric excess was determined by HPLC on chiralpak IB-3 column, hexane: isopropanol = 80:20, flow rate = 0.5 mL/min, UV detection at 215 nm,  $t_R$  = 21.6 min (minor), 23.5 min (major).

#### Ethyl 4-(2-((benzyloxy)methyl)-1,3-dioxolan-2-yl)-3-hydroxybutanoate, **2h**

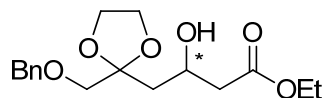

Colorless oil, 91% yield, 99.2% ee,  $[\alpha]_D^{20} = +1.2$  ( $c = 0.57$  CH<sub>2</sub>Cl<sub>2</sub>). <sup>1</sup>H NMR (400 MHz, CDCl<sub>3</sub>)  $\delta$  7.37 – 7.26 (m, 5H), 4.63 – 4.56 (m, 2H), 4.38 – 4.31 (m, 1H), 4.16 (qd,  $J = 7.1, 1.4$  Hz, 2H), 4.05 – 4.01 (m, 4H), 3.59 (d,  $J = 1.8$  Hz, 1H), 3.48 – 3.42 (m, 2H), 2.54 – 2.42 (m, 2H), 2.02 – 1.92 (m, 2H), 1.26 (t,  $J = 7.1$  Hz, 3H). <sup>13</sup>C NMR (100 MHz, CDCl<sub>3</sub>)  $\delta$  171.7, 137.7, 128.3, 127.7, 127.6, 109.6, 73.5, 72.0, 65.3, 65.1, 64.5, 60.5, 42.1, 40.9, 14.1. HRMS-ESI ( $m/z$ ): Calculated for [C<sub>17</sub>H<sub>24</sub>O<sub>6</sub>ClNa]<sup>+</sup>: 347.1471, found: 347.1464. The enantiomeric excess was determined by HPLC on chiralpak IB-3 column, hexane: isopropanol = 90:10, flow rate = 0.5 mL/min, UV detection at 215 nm,  $t_R$  = 34.5 min (minor), 37.8 min (major).

#### *tert*-Butyl 4-(2-((benzyloxy)methyl)-1,3-dioxolan-2-yl)-3-hydroxybutanoate, **2i**

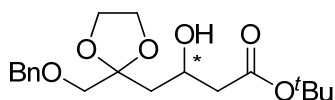

Colorless oil, 95% yield, 99.6% ee,  $[\alpha]_D^{20} = +1.6$  ( $c = 0.94$  CH<sub>2</sub>Cl<sub>2</sub>). <sup>1</sup>H NMR (400 MHz, CDCl<sub>3</sub>)  $\delta$  7.37 – 7.27 (m, 5H), 4.63 – 4.56 (m, 2H), 4.29 – 4.26 (m, 1H), 4.05 – 4.00 (m, 4H), 3.57 (d,  $J = 1.8$  Hz, 1H), 3.46 (q,  $J = 10.6$  Hz, 2H), 2.47 – 2.33 (m, 2H), 1.99 – 1.90 (m, 2H), 1.45 (s, 9H). <sup>13</sup>C NMR (100 MHz, CDCl<sub>3</sub>)  $\delta$  171.1, 137.8, 128.3, 127.6, 127.6, 109.6, 80.7,

73.5, 72.1, 65.3, 65.1, 64.6, 43.1, 40.9, 28.0. HRMS-ESI ( $m/z$ ): Calculated for  $[C_9H_{28}O_6ClNa]^+$ : 375.1784, found: 375.1761. The enantiomeric excess was determined by HPLC on chiralcel OJ-H column, hexane: isopropanol = 95:5, flow rate = 0.6 mL/min, UV detection at 215 nm,  $t_R$  = 54.4 min (major), 64.8 min (minor).

#### 4. Preparation of the Corresponding Derivatives of 2a-f

##### 4.2 Typical procedure for the preparation of the *p*-nitrobenzoates 3b, 4c, and 4d

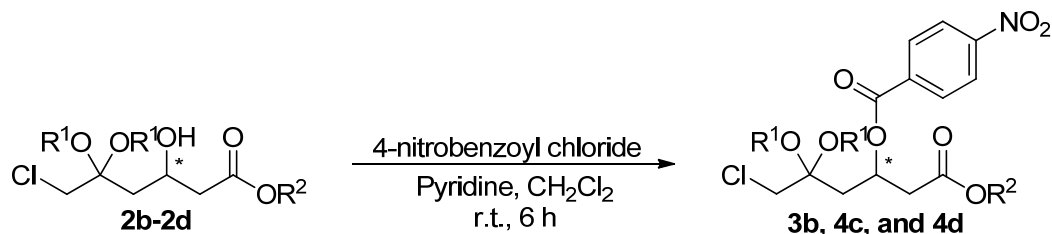

A 25 mL round flask was charged with **2b** (1 mmol), pyridine (0.4 mL, 5 mmol), 4-nitrobenzoyl chloride (278 mg, 1.5 mmol), DMAP (6 mg) and CH<sub>2</sub>Cl<sub>2</sub> (10 mL). The mixture was stirred at 25-30 °C for 6 hours, saturated aqueous NaHCO<sub>3</sub> solution (5 mL) was added and the organic layer was separated. The organic layer was washed with 1M aqueous hydrochloric acid, saturated aqueous NaHCO<sub>3</sub> solution and brine. The washed organic solution was dried over anhydrous Na<sub>2</sub>SO<sub>4</sub> and concentrated *in vacuo* to obtain the crude product, which was purified by column chromatography with petroleum ether and ethyl acetate (3:1) as eluent.

##### 1-(2-(Chloromethyl)-1,3-dioxolan-2-yl)-4-methoxy-4-oxobutan-2-yl 4-nitrobenzoate, 3b

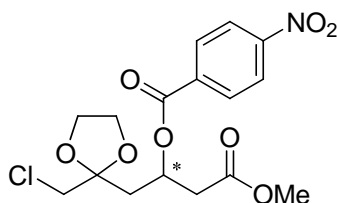

Yellow oil, 85% yield. <sup>1</sup>H NMR (400 MHz, CDCl<sub>3</sub>) δ 8.31 – 8.18 (m, 4H), 5.77 – 5.71 (m, 1H), 4.07 – 3.96 (m, 4H), 3.68 (s, 3H), 3.51 (q, *J* = 11.8 Hz, 2H), 2.88 – 2.77 (m, 2H), 2.48 (dd, *J* = 15.2, 7.4 Hz, 1H), 2.29 (dd, *J* = 15.2, 4.3 Hz, 1H). <sup>13</sup>C NMR (100 MHz, CDCl<sub>3</sub>) δ 170.3, 163.8, 150.5, 135.5, 130.7, 123.5, 108.1, 67.8, 65.50, 65.46, 51.9, 46.4, 39.6, 38.4. HRMS-ESI ( $m/z$ ): Calculated for  $[C_{16}H_{18}NO_8ClNa]^+$ : 410.0619, found: 410.0615.

##### 4-Methoxy-1-(2-methyl-1,3-dioxolan-2-yl)-4-oxobutan-2-yl 4-nitrobenzoate, 4c

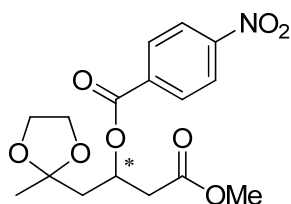

Yellow oil, 63% yield.  $^1\text{H}$  NMR (400 MHz,  $\text{CDCl}_3$ )  $\delta$  8.29 – 8.18 (m, 4H), 5.75 – 5.69 (m, 1H), 3.97 – 3.89 (m, 4H), 3.67 (s, 3H), 2.88 (dd,  $J = 15.8, 5.1$  Hz, 1H), 2.78 (dd,  $J = 15.8, 7.4$  Hz, 1H), 2.27 (dd,  $J = 14.8, 6.8$  Hz, 1H), 2.11 (dd,  $J = 14.8, 5.2$  Hz, 1H), 1.39 (s, 3H).  $^{13}\text{C}$  NMR (100 MHz,  $\text{CDCl}_3$ )  $\delta$  170.4, 163.7, 150.3, 135.6, 130.6, 123.4, 108.1, 68.6, 64.3, 51.7, 42.0, 39.4, 24.1. HRMS-ESI ( $m/z$ ): Calculated for  $[\text{C}_{16}\text{H}_{19}\text{NO}_8\text{Na}]^+$ : 376.1008, found: 376.1014.

#### 1-(2-Ethyl-1,3-dioxolan-2-yl)-4-methoxy-4-oxobutan-2-yl 4-nitrobenzoate, 4d

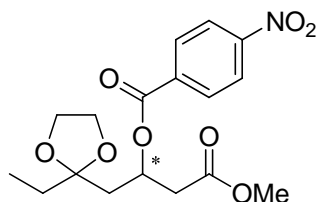

Yellow oil, 68% yield.  $^1\text{H}$  NMR (400 MHz,  $\text{CDCl}_3$ )  $\delta$  8.30 – 8.17 (m, 4H), 5.72 – 5.65 (m, 1H), 3.99 – 3.89 (m, 4H), 3.67 (s, 3H), 2.89 (dd,  $J = 15.8, 5.0$  Hz, 1H), 2.77 (dd,  $J = 15.8, 7.4$  Hz, 1H), 2.24 (dd,  $J = 14.8, 6.6$  Hz, 1H), 2.07 (dd,  $J = 14.8, 5.5$  Hz, 1H), 1.69 (q,  $J = 7.5$  Hz, 2H), 0.93 (t,  $J = 7.5$  Hz, 3H).  $^{13}\text{C}$  NMR (100 MHz,  $\text{CDCl}_3$ )  $\delta$  170.6, 163.8, 150.5, 135.8, 130.7, 123.5, 110.4, 68.8, 64.85, 64.80, 51.8, 39.8, 39.6, 30.3, 8.0. HRMS-ESI ( $m/z$ ): Calculated for  $[\text{C}_{17}\text{H}_{21}\text{NO}_8\text{Na}]^+$ : 390.1165, found: 390.1140.

#### 4.2 Typical procedure for the preparation of 4-chlorobenzethiol substituted derivatives 4a, 4e and 4f

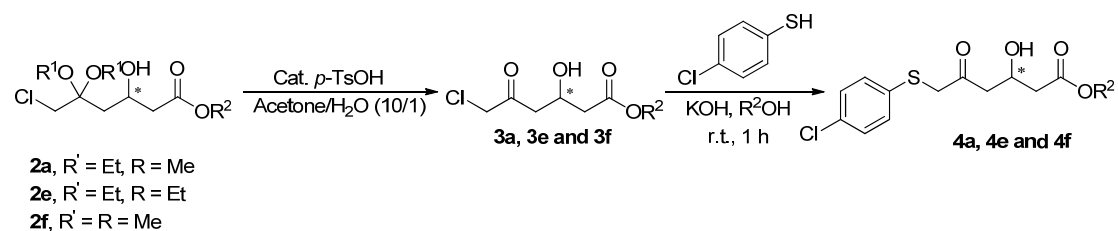

To the solution of **2a** (0.5 mmol) in acetone (2.0 mL) and  $\text{H}_2\text{O}$  (0.2 mL) was added 10% mol of *p*-TsOH, and the resulting solution was stirred for 2 h at  $35^\circ\text{C}$ . After **2a** was completely consumed,  $\text{NaHCO}_3$  (0.1 mmol) was added and the mixture was stirred for 10 min at RT. The resultant was concentrated under reduced pressure and the residue was dissolved in MeOH (10 mL), and then 4-chlorobenzethiol (0.6 mmol) and potassium hydroxide (0.5 mmol) were added. The resulting mixture was stirred for 1 h at RT. After completion of the reaction, MeOH was removed under reduced pressure to give the crude product **4a**, which was purified by column chromatography with petroleum ether and ethyl acetate (2:1) as eluent.

### Methyl 6-((4-chlorophenyl)thio)-3-hydroxy-5-oxohexanoate, **4a** and **4f**

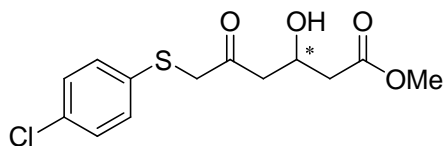

Colorless oil, 86% yield from **2a** and **2e**.  $^1\text{H}$  NMR (400 MHz,  $\text{CDCl}_3$ )  $\delta$  7.30 – 7.25 (m, 4H), 4.49 – 4.42 (m, 1H), 3.71 (s, 3H), 3.69 (d,  $J = 1.5$  Hz, 2H), 3.28 (d,  $J = 3.9$  Hz, 1H), 2.90 – 2.76 (m, 2H), 2.51 (d,  $J = 6.3$  Hz, 2H).  $^{13}\text{C}$  NMR (100 MHz,  $\text{CDCl}_3$ )  $\delta$  204.2, 172.2, 133.1, 132.7, 131.1, 129.3, 64.4, 51.8, 46.1, 44.5, 40.3. HRMS-ESI ( $m/z$ ): Calculated for  $[\text{C}_{13}\text{H}_{15}\text{SO}_4\text{ClNa}]^+$ : 325.0277, found: 325.0262.

### Ethyl 6-((4-chlorophenyl)thio)-3-hydroxy-5-oxohexanoate, **4e**:

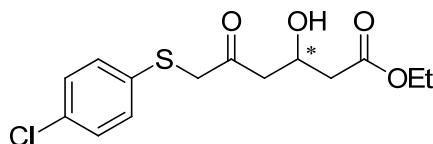

White solid, 83% yield.  $^1\text{H}$  NMR (400 MHz,  $\text{CDCl}_3$ )  $\delta$  7.29 – 7.25 (m, 4H), 4.49 – 4.42 (m, 1H), 4.16 (q,  $J = 7.1$  Hz, 2H), 3.73 – 3.65 (m, 2H), 3.35 (d,  $J = 3.9$  Hz, 1H), 2.90 – 2.76 (m, 2H), 2.49 (d,  $J = 6.3$  Hz, 2H), 1.27 (t,  $J = 7.1$  Hz, 3H).  $^{13}\text{C}$  NMR (100 MHz,  $\text{CDCl}_3$ )  $\delta$  204.1, 171.8, 133.0, 132.7, 131.0, 129.2, 64.4, 60.7, 46.2, 44.5, 40.5, 14.0. HRMS-ESI ( $m/z$ ): Calculated for  $[\text{C}_{14}\text{H}_{17}\text{SO}_4\text{ClNa}]^+$ : 339.0434, found: 339.0414.

## 5. Synthesis of $\delta$ -keto- $\beta$ -hydroxy esters

### 5.1 Synthesis of 6-chloro-3-hydroxy-5-oxohexanoate **3a**

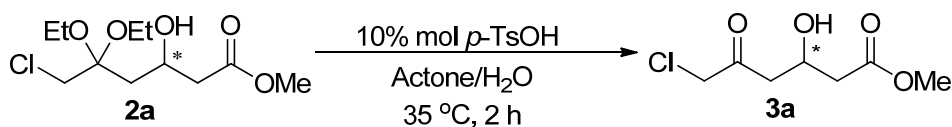

To the solution of methyl 6-chloro-5,5-diethoxy-3-hydroxyhexanoate (500 mg, 1.9 mmol) in acetone (3.0 mL) and  $\text{H}_2\text{O}$  (0.3 mL) was added 10% mol *p*-TsOH (32 mg), and the resulting solution was stirred for 2 h at 35 °C. After methyl 6-chloro-5,5-diethoxy-3-hydroxyhexanoate was completely consumed,  $\text{NaHCO}_3$  (32 mg) was added and the mixture was stirred for 10 min at RT. The resultant was concentrated under reduced pressure and the residue was diluted with ethyl acetate (20 mL) and water (5 mL), the aqueous was extracted with ethyl acetate (10 mL x 3) and the combined organic phase was dried over anhydrous  $\text{MgSO}_4$ , concentrated in vacuum. The residue was purified by silica-gel column chromatography with petroleum ether and ethyl acetate (2:1) as eluent to give methyl 6-chloro-3-hydroxy-5-oxohexanoate **3a** (349 mg, 96%) as white solid.  $[\alpha]_{\text{D}}^{20} = -11.1$  ( $c = 0.93$

CH<sub>2</sub>Cl<sub>2</sub>). <sup>1</sup>H NMR (400 MHz, CDCl<sub>3</sub>) δ 4.55 – 4.48 (m, 1H), 4.15 (s, 2H), 3.73 (s, 3H), 3.31 (d, *J* = 4.0 Hz, 1H), 2.89 – 2.76 (m, 2H), 2.60 – 2.51 (m, 2H). <sup>13</sup>C NMR (100 MHz, CDCl<sub>3</sub>) δ 201.5, 172.1, 64.1, 51.8, 48.8, 45.6, 40.4. HRMS-ESI (*m/z*): Calculated for [C<sub>7</sub>H<sub>11</sub>O<sub>4</sub>ClNa]<sup>+</sup>: 217.0244, found: 217.0245.

### 5.2 Synthesis of methyl 3-hydroxy-5-oxohexanoate **3c**<sup>[5]</sup>

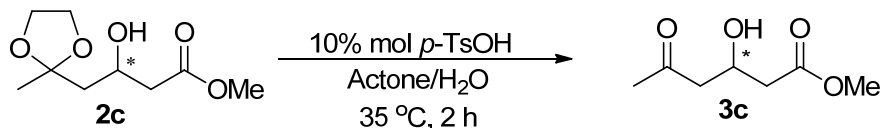

The methyl 3-hydroxy-5-oxohexanoate **3c** was prepared as synthetic procedure for **3a**. Colorless oil, 93% yield.  $[\alpha]_{\text{D}}^{20} = -16.6$  (*c* = 1.04 in CHCl<sub>3</sub>) ( $[\alpha]_{\text{D}}^{20} = -10.0$  (*c* = 1.1 in CHCl<sub>3</sub>), 75% *ee* (*S*)<sup>[6]</sup>). <sup>1</sup>H NMR (400 MHz, CDCl<sub>3</sub>) δ 4.52 – 4.45 (m, 1H), 3.72 (s, 3H), 3.43 (d, *J* = 3.6 Hz, 1H), 2.70 – 2.69 (m, 2H), 2.54 – 2.52 (m, 2H), 2.20 (s, 3H). <sup>13</sup>C NMR (100 MHz, CDCl<sub>3</sub>) δ 208.1, 172.0, 64.0, 51.6, 48.9, 40.3, 30.5.

### 5.3 Synthesis of methyl 3-hydroxy-5-oxoheptanoate **3d**<sup>[7]</sup>

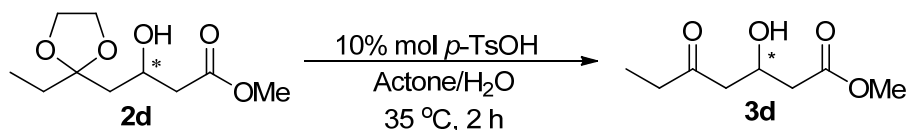

The methyl 3-hydroxy-5-oxoheptanoate **3d** was prepared as synthetic procedure for **3a**. Colorless oil, 93% yield.  $[\alpha]_{\text{D}}^{20} = -12.8$  (*c* = 1.19 in CH<sub>2</sub>Cl<sub>2</sub>). <sup>1</sup>H NMR (400 MHz, CDCl<sub>3</sub>) δ 4.52 – 4.46 (m, 1H), 3.72 (s, 3H), 3.47 (d, *J* = 3.4 Hz, 1H), 2.67 – 2.66 (m, 2H), 2.53 (dd, *J* = 6.4, 2.1 Hz, 2H), 2.48 (q, *J* = 7.3 Hz, 2H), 1.07 (t, *J* = 7.3 Hz, 3H). <sup>13</sup>C NMR (100 MHz, CDCl<sub>3</sub>) δ 211.0, 172.1, 64.3, 51.7, 47.7, 40.4, 36.6, 7.4.

## Reference

- [1] S. Benetti, R. Romagnoli, *Chem. Rev.*, 1995, **95**, 1065.
- [2] D. W. Brooks, L. D. –L. Lu, S. Masamune, *Angew. Chem. Int. Ed.*, 1979, **18**, 72.
- [3] (a) H. Okawara, H. Nakai, M. Ohno, *Tetrahedron Lett.*, 1982, **23**, 1087; (b) M. G. Constantino, P. M. Donate, N. Petragani, *J. Org. Chem.*, 1986, **51**, 253.
- [4] S. -Y. Chou, *Heterocycles*, 2003, **60**, 1095.
- [5] (a) C. L. Sann, T. J. Simpson, D. I. Smith, P. Watts, C. L. Willis, *Tetrahedron Lett.*, 1999, **40**, 4093; (b) K. –M. Cheung, S. J. Coles, M. B. Hursthouse, N. I. Johnson, P. M. Shoolingin-Jordan, *Angew. Chem. Int. Ed.*, 2002, **41**, 1198.

[6] V. Blandin, J. F. Carpentier, A. Mortreux, *Eur. J. Org. Chem.*, 1999, 3421.

[7] D. -D. Donatienne, F. Andreas, K. Ernst, O. Lukas, S. Gottfried. PCT Int. Appl. 2004, WO 2004056832.



## 6. HPLC Chromatography of the Hydrogenation Products

### Scheme 1

The enantiomeric excess of methyl 6-chloro-5,5-diethoxy-3-hydroxyhexanoate **2a** was determined via its corresponding 4-chlorobenzethiol substituted derivative **4a** (deprotection of **2a** and then substituted with 4-chlorobenzethiol) by HPLC on chiralcel OB-H column.

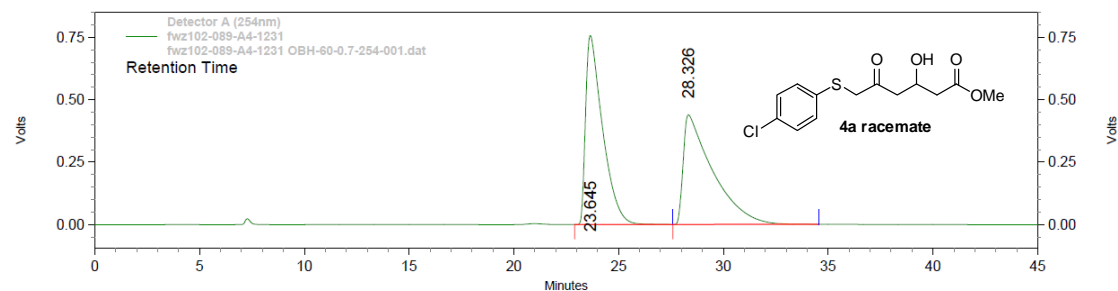

Detector A (254nm)

| PK #   | Retention Time | Area     | Area %  | Height  | Height % |
|--------|----------------|----------|---------|---------|----------|
| 1      | 23.645         | 42638851 | 49.915  | 757083  | 63.304   |
| 2      | 28.326         | 42783785 | 50.085  | 438866  | 36.696   |
| Totals |                | 85422637 | 100.000 | 1195948 | 100.000  |

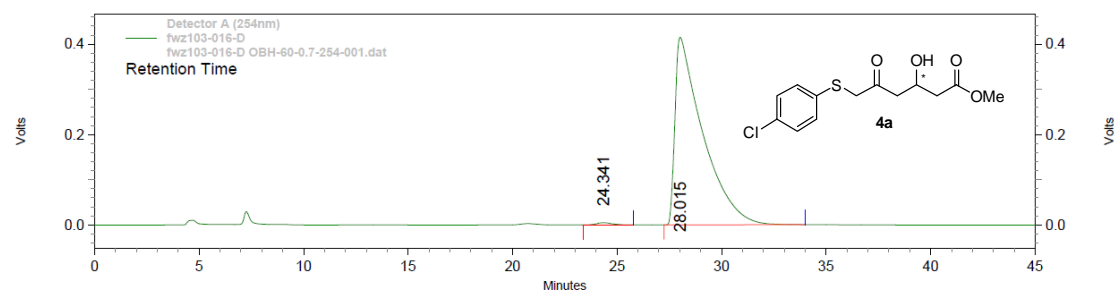

Detector A (254nm)

| PK #   | Retention Time | Area     | Area %  | Height | Height % |
|--------|----------------|----------|---------|--------|----------|
| 1      | 24.341         | 226751   | 0.589   | 4705   | 1.120    |
| 2      | 28.015         | 38267248 | 99.411  | 415257 | 98.880   |
| Totals |                | 38493999 | 100.000 | 419962 | 100.000  |

The enantiomeric excess of methyl 4-(2-(chloromethyl)-1,3-dioxolan-2-yl)-3-hydroxybutanoate **2b** was determined via its corresponding 4-nitrobenzoate **3b** by HPLC on chiralcel AD-H column.

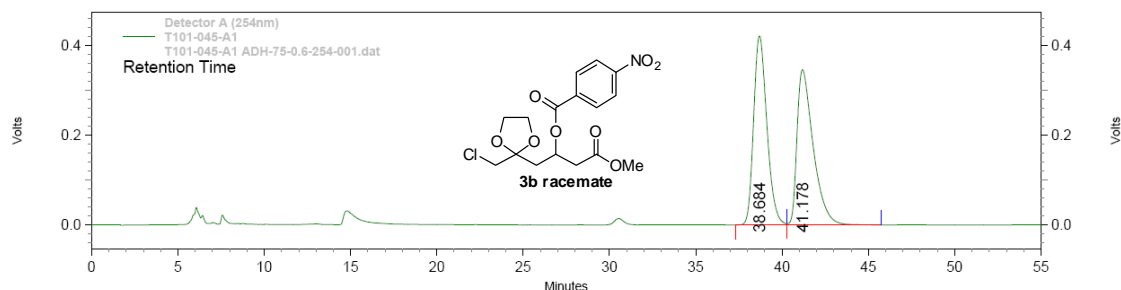

Detector A (254nm)

| PK #   | Retention Time | Area     | Area %  | Height | Height % |
|--------|----------------|----------|---------|--------|----------|
| 1      | 38.684         | 22477638 | 49.933  | 421091 | 54.911   |
| 2      | 41.178         | 22538065 | 50.067  | 345768 | 45.089   |
| Totals |                | 45015703 | 100.000 | 766859 | 100.000  |

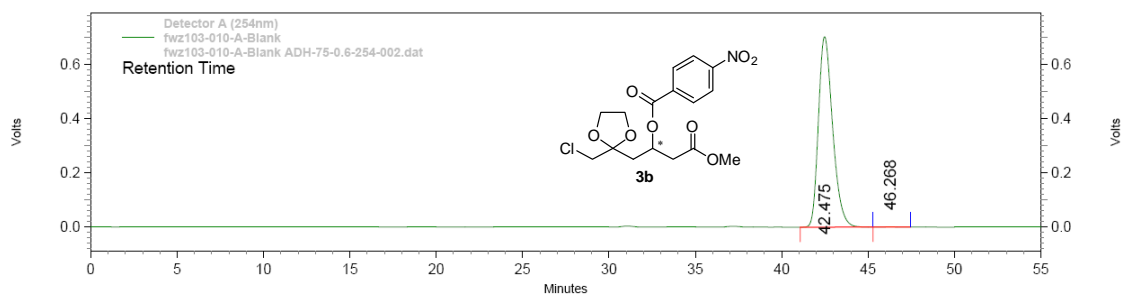

Detector A (254nm)

| PK #   | Retention Time | Area     | Area %  | Height | Height % |
|--------|----------------|----------|---------|--------|----------|
| 1      | 42.475         | 40247820 | 99.829  | 702977 | 99.852   |
| 2      | 46.268         | 68799    | 0.171   | 1044   | 0.148    |
| Totals |                | 40316618 | 100.000 | 704021 | 100.000  |

### HPLC of 4a racemate:

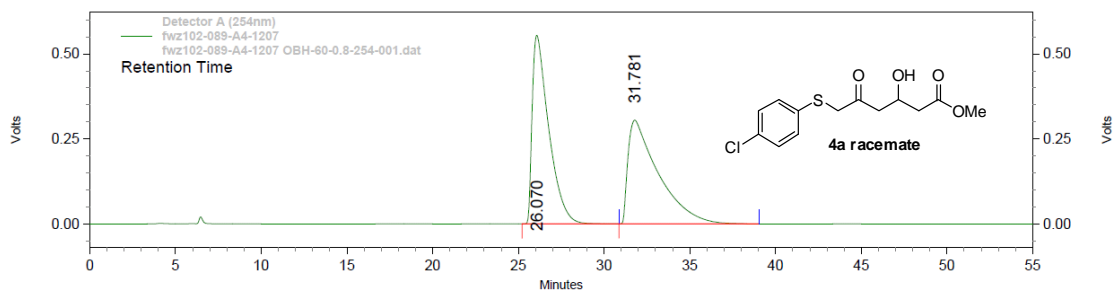

| Detector A (254nm) |                |          |         |        |          |
|--------------------|----------------|----------|---------|--------|----------|
| Pk #               | Retention Time | Area     | Area %  | Height | Height % |
| 1                  | 26.070         | 37221572 | 49.806  | 554793 | 64.515   |
| 2                  | 31.781         | 37511718 | 50.194  | 305153 | 35.485   |
| Totals             |                | 74733290 | 100.000 | 859946 | 100.000  |

### Table 1, entry 1: no additive

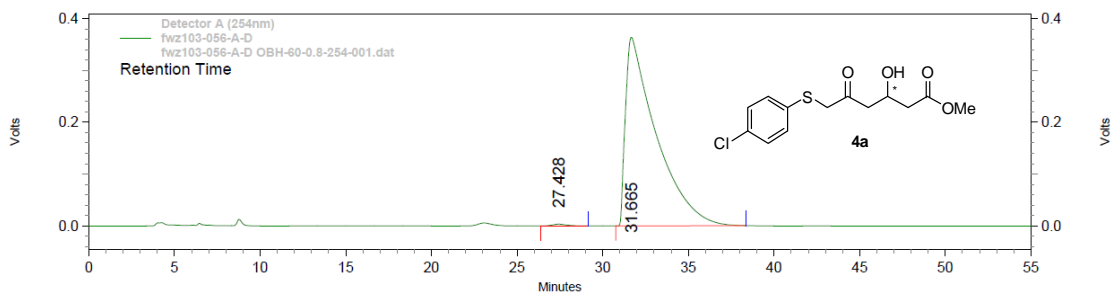

| Detector A (254nm) |                |          |         |        |          |
|--------------------|----------------|----------|---------|--------|----------|
| Pk #               | Retention Time | Area     | Area %  | Height | Height % |
| 1                  | 27.428         | 180433   | 0.397   | 3222   | 0.877    |
| 2                  | 31.665         | 45321190 | 99.603  | 364105 | 99.123   |
| Totals             |                | 45501622 | 100.000 | 367327 | 100.000  |

**ee of 3a:** enantiomeric excess of **3a** was determined via its corresponding 4-chlorobenzethiol substituted derivative

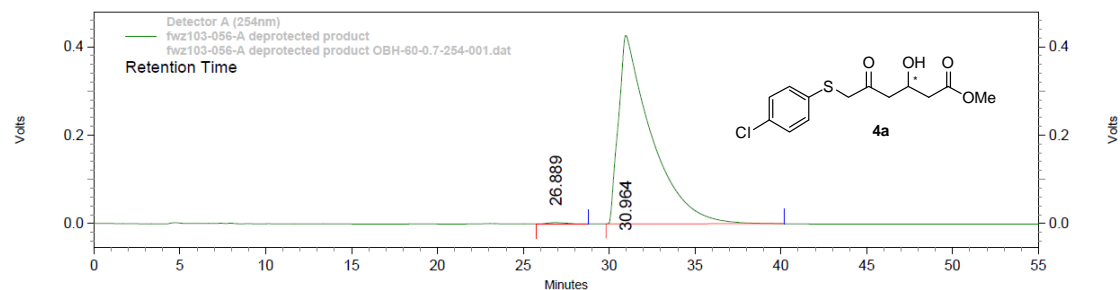

| Detector A (254nm) |                |          |         |        |          |
|--------------------|----------------|----------|---------|--------|----------|
| Pk #               | Retention Time | Area     | Area %  | Height | Height % |
| 1                  | 26.889         | 217551   | 0.382   | 3084   | 0.718    |
| 2                  | 30.964         | 56763272 | 99.618  | 426441 | 99.282   |
| Totals             |                | 56980822 | 100.000 | 429525 | 100.000  |

**Table 1, entry 2: Et<sub>3</sub>N as additive**

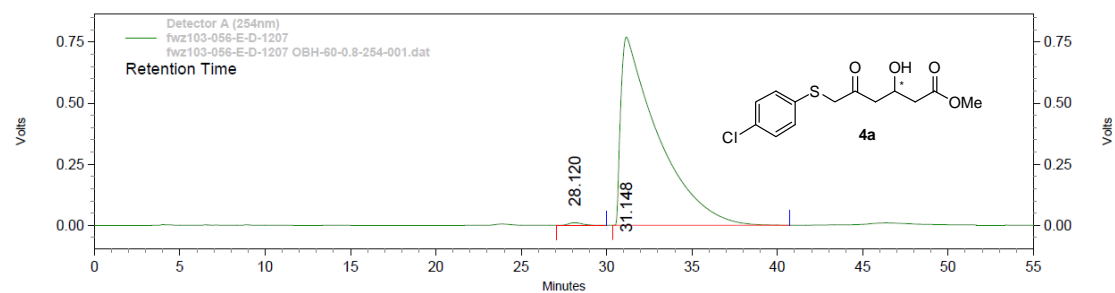

| Detector A (254nm) |                |           |         |        |          |
|--------------------|----------------|-----------|---------|--------|----------|
| Pk #               | Retention Time | Area      | Area %  | Height | Height % |
| 1                  | 28.120         | 584244    | 0.498   | 10784  | 1.381    |
| 2                  | 31.148         | 116849239 | 99.502  | 770078 | 98.619   |
| Totals             |                | 117433483 | 100.000 | 780862 | 100.000  |

**Table 1, entry 3: *i*Pr<sub>2</sub>NEt as additive**

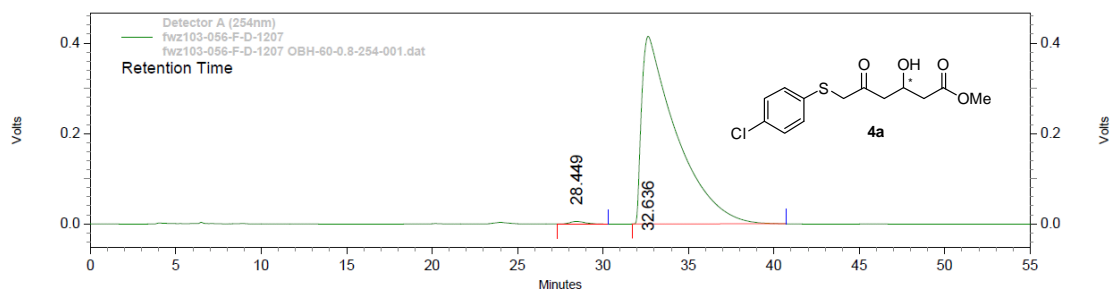

**Detector A (254nm)**

| Pk # | Retention Time | Area     | Area % | Height | Height % |
|------|----------------|----------|--------|--------|----------|
| 1    | 28.449         | 328136   | 0.556  | 5616   | 1.334    |
| 2    | 32.636         | 58697457 | 99.444 | 415462 | 98.666   |

|        |  |          |         |        |         |
|--------|--|----------|---------|--------|---------|
| Totals |  | 59025593 | 100.000 | 421078 | 100.000 |
|--------|--|----------|---------|--------|---------|

**Table 1, entry 4: Imidazole as additive**

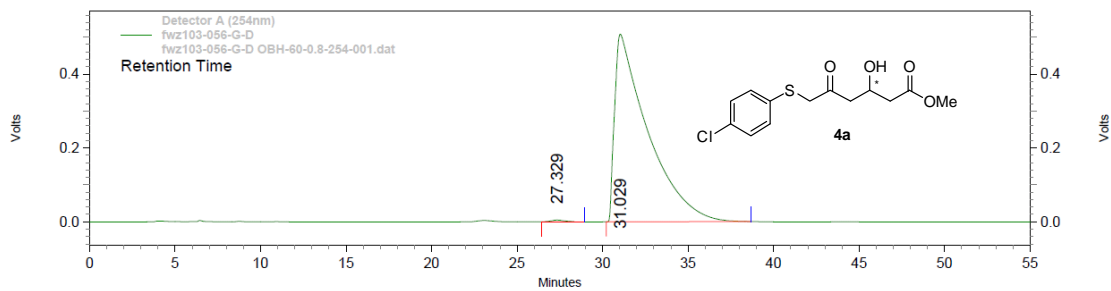

**Detector A (254nm)**

| Pk # | Retention Time | Area     | Area % | Height | Height % |
|------|----------------|----------|--------|--------|----------|
| 1    | 27.329         | 235493   | 0.343  | 4348   | 0.849    |
| 2    | 31.029         | 68354212 | 99.657 | 507972 | 99.151   |

|        |  |          |         |        |         |
|--------|--|----------|---------|--------|---------|
| Totals |  | 68589705 | 100.000 | 512320 | 100.000 |
|--------|--|----------|---------|--------|---------|

**Table 1, entry 5: AcONa as additive**

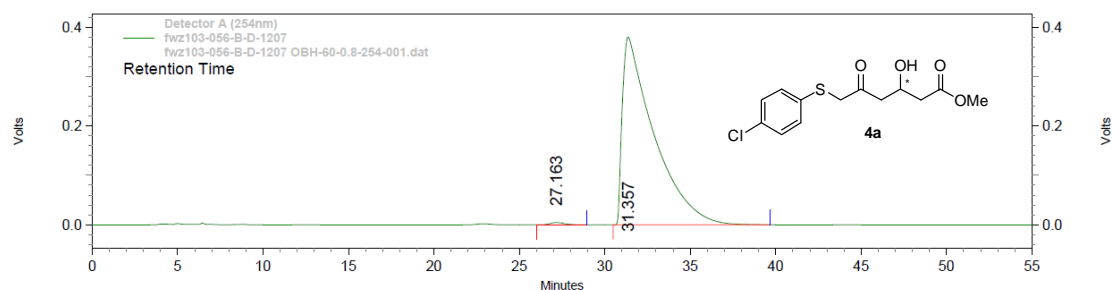

**Detector A (254nm)**

| Pk # | Retention Time | Area     | Area % | Height | Height % |
|------|----------------|----------|--------|--------|----------|
| 1    | 27.163         | 256373   | 0.523  | 4650   | 1.210    |
| 2    | 31.357         | 48748410 | 99.477 | 379601 | 98.790   |

|        |  |          |         |        |         |
|--------|--|----------|---------|--------|---------|
| Totals |  | 49004783 | 100.000 | 384251 | 100.000 |
|--------|--|----------|---------|--------|---------|

**Table 1, entry 7: 4 mg CaCO<sub>3</sub> as additive**

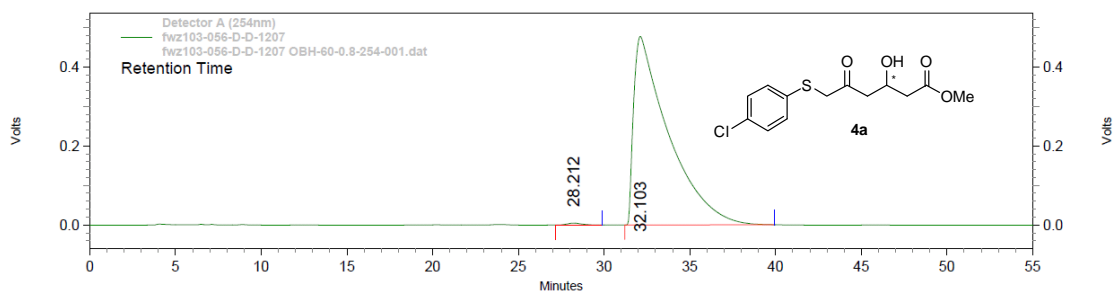

**Detector A (254nm)**

| Pk # | Retention Time | Area     | Area % | Height | Height % |
|------|----------------|----------|--------|--------|----------|
| 1    | 28.212         | 265404   | 0.391  | 4673   | 0.970    |
| 2    | 32.103         | 67607751 | 99.609 | 477364 | 99.030   |

|        |  |          |         |        |         |
|--------|--|----------|---------|--------|---------|
| Totals |  | 67873156 | 100.000 | 482037 | 100.000 |
|--------|--|----------|---------|--------|---------|

**Table 1, entry 8: Basic Al<sub>2</sub>O<sub>3</sub> as additive**

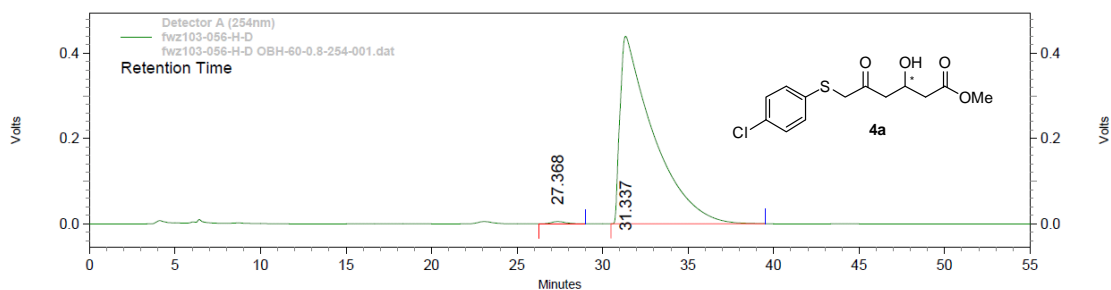

**Detector A (254nm)**

| Pk # | Retention Time | Area     | Area % | Height | Height % |
|------|----------------|----------|--------|--------|----------|
| 1    | 27.368         | 285311   | 0.477  | 5171   | 1.162    |
| 2    | 31.337         | 59507447 | 99.523 | 440003 | 98.838   |

|        |  |          |         |        |         |
|--------|--|----------|---------|--------|---------|
| Totals |  | 59792758 | 100.000 | 445174 | 100.000 |
|--------|--|----------|---------|--------|---------|

**Table 1, entry 9: 12 mg CaCO<sub>3</sub> was added as additive**

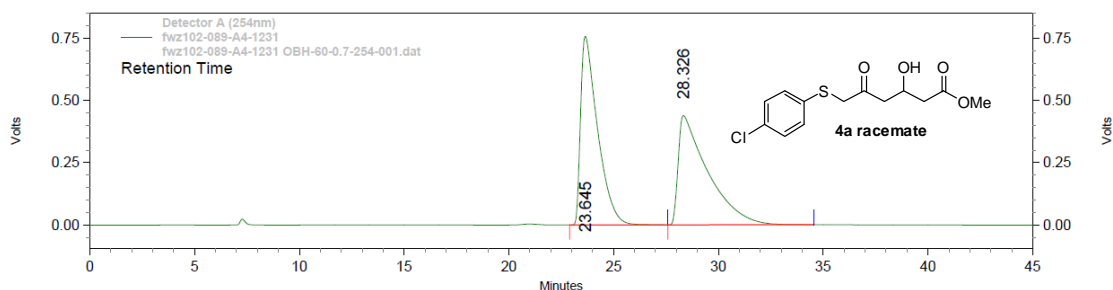

**Detector A (254nm)**

| Pk # | Retention Time | Area     | Area % | Height | Height % |
|------|----------------|----------|--------|--------|----------|
| 1    | 23.645         | 42638851 | 49.915 | 757083 | 63.304   |
| 2    | 28.326         | 42783785 | 50.085 | 438866 | 36.696   |

|        |  |          |         |         |         |
|--------|--|----------|---------|---------|---------|
| Totals |  | 85422637 | 100.000 | 1195948 | 100.000 |
|--------|--|----------|---------|---------|---------|

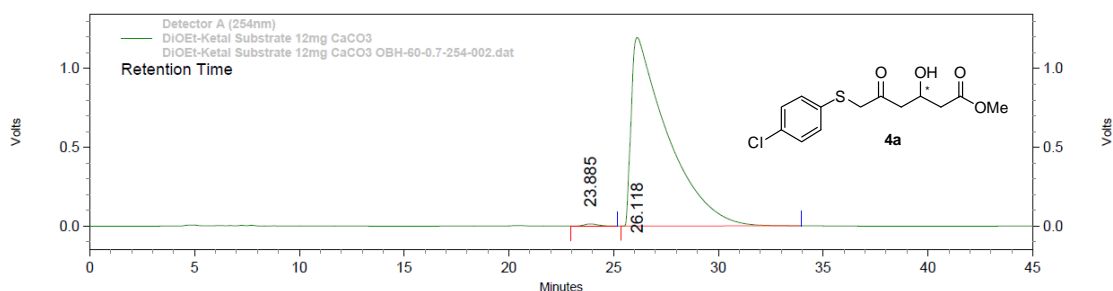

**Detector A (254nm)**

| Pk # | Retention Time | Area      | Area % | Height  | Height % |
|------|----------------|-----------|--------|---------|----------|
| 1    | 23.885         | 574315    | 0.397  | 13387   | 1.106    |
| 2    | 26.118         | 144055084 | 99.603 | 1196612 | 98.894   |

|        |  |           |         |         |         |
|--------|--|-----------|---------|---------|---------|
| Totals |  | 144629400 | 100.000 | 1209999 | 100.000 |
|--------|--|-----------|---------|---------|---------|



**Table 2, entry 1:**

The enantiomeric excess of methyl 6-chloro-5,5-diethoxy-3-hydroxyhexanoate **2a** was determined via its corresponding 4-chlorobenzethiol substituted derivative **4a** (deprotection of **2a** and then substituted with 4-chlorobenzethiol) by HPLC on chiralcel OB-H column.

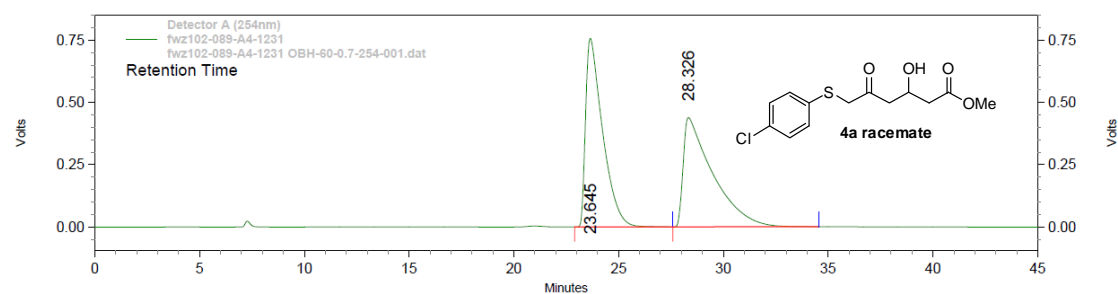

| Detector A (254nm) |                |          |         |         |          |
|--------------------|----------------|----------|---------|---------|----------|
| PK #               | Retention Time | Area     | Area %  | Height  | Height % |
| 1                  | 23.645         | 42638851 | 49.915  | 757083  | 63.304   |
| 2                  | 28.326         | 42783785 | 50.085  | 438866  | 36.696   |
| Totals             |                | 85422637 | 100.000 | 1195948 | 100.000  |

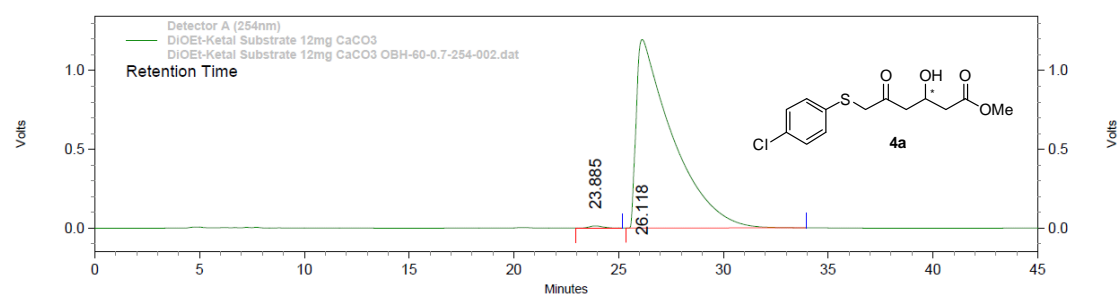

| Detector A (254nm) |                |           |         |         |          |
|--------------------|----------------|-----------|---------|---------|----------|
| PK #               | Retention Time | Area      | Area %  | Height  | Height % |
| 1                  | 23.885         | 574315    | 0.397   | 13387   | 1.106    |
| 2                  | 26.118         | 144055084 | 99.603  | 1196612 | 98.894   |
| Totals             |                | 144629400 | 100.000 | 1209999 | 100.000  |

**Table 2, entry 2:**

The enantiomeric excess of methyl 3-hydroxy-4-(2-methyl-1,3-dioxolan-2-yl)butanoate **2c** was determined via its corresponding 4-nitrobenzoate **4c** by HPLC on chiralcel OD-H column.

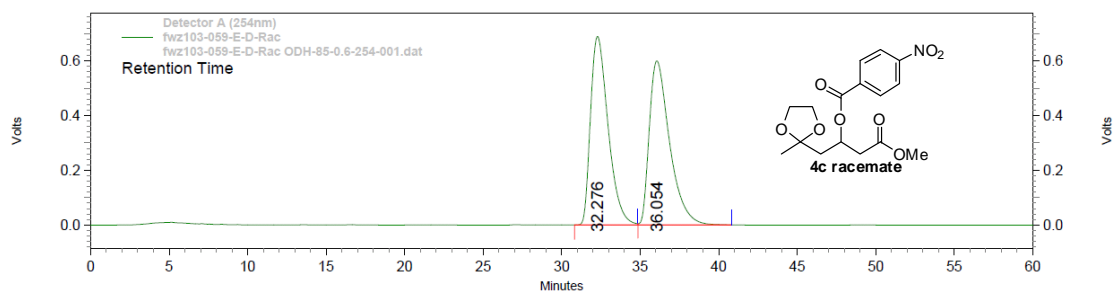

**Detector A (254nm)**

| Pk #   | Retention Time | Area      | Area %  | Height  | Height % |
|--------|----------------|-----------|---------|---------|----------|
| 1      | 32.276         | 53574116  | 49.860  | 689264  | 53.485   |
| 2      | 36.054         | 53875386  | 50.140  | 599448  | 46.515   |
| Totals |                | 107449501 | 100.000 | 1288712 | 100.000  |

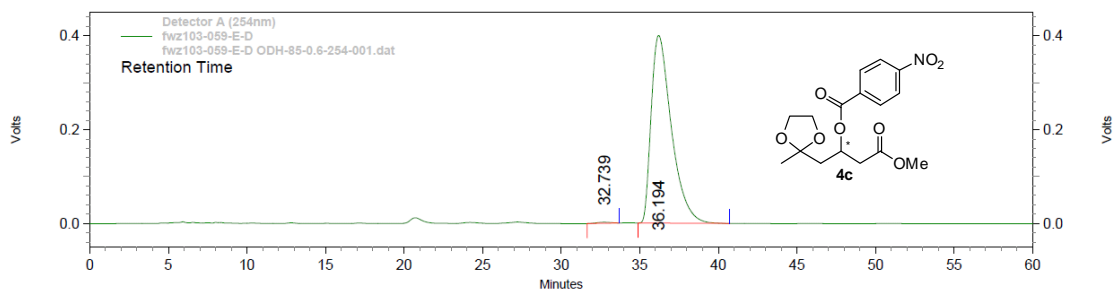

**Detector A (254nm)**

| Pk #   | Retention Time | Area     | Area %  | Height | Height % |
|--------|----------------|----------|---------|--------|----------|
| 1      | 32.739         | 125507   | 0.349   | 2186   | 0.543    |
| 2      | 36.194         | 35817876 | 99.651  | 400467 | 99.457   |
| Totals |                | 35943383 | 100.000 | 402653 | 100.000  |

**Table 2, entry 3:**

The enantiomeric excess of methyl 4-(2-ethyl-1,3-dioxolan-2-yl)-3-hydroxybutanoate **2d** was determined via its corresponding 4-nitrobenzoate **4d** by HPLC on chiralcel AS-H column.

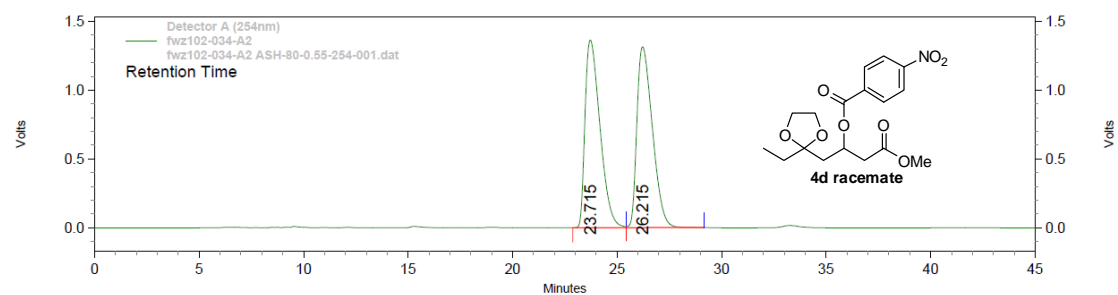

**Detector A (254nm)**

| Pk #   | Retention Time | Area      | Area %  | Height  | Height % |
|--------|----------------|-----------|---------|---------|----------|
| 1      | 23.715         | 67655821  | 49.934  | 1363066 | 50.925   |
| 2      | 26.215         | 67835749  | 50.066  | 1313543 | 49.075   |
| Totals |                | 135491570 | 100.000 | 2676610 | 100.000  |

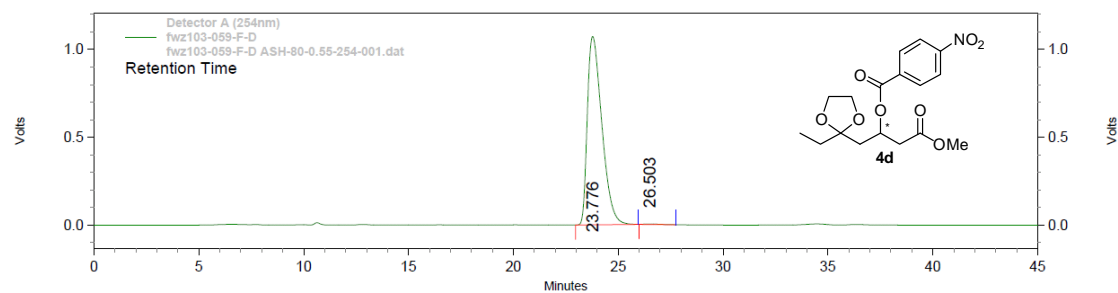

**Detector A (254nm)**

| Pk #   | Retention Time | Area     | Area %  | Height  | Height % |
|--------|----------------|----------|---------|---------|----------|
| 1      | 23.776         | 51619859 | 99.745  | 1073978 | 99.716   |
| 2      | 26.503         | 132160   | 0.255   | 3061    | 0.284    |
| Totals |                | 51752019 | 100.000 | 1077039 | 100.000  |

**Table 2, entry 4:**

The enantiomeric excess of ethyl 6-chloro-5,5-diethoxy-3-hydroxyhexanoate **2e** was determined via its corresponding 4-chlorobenzethiol substituted derivative **4e** (deprotection of **2e** and then substituted with 4-chlorobenzethiol) by HPLC on chiralcel OB-H column.

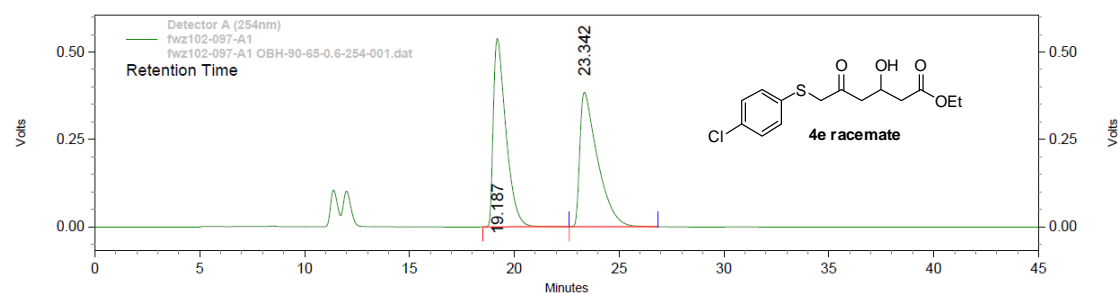

| Detector A (254nm) |                |          |         |        |          |
|--------------------|----------------|----------|---------|--------|----------|
| Pk #               | Retention Time | Area     | Area %  | Height | Height % |
| 1                  | 19.187         | 22534210 | 49.922  | 539446 | 58.380   |
| 2                  | 23.342         | 22605019 | 50.078  | 384579 | 41.620   |
| Totals             |                | 45139229 | 100.000 | 924025 | 100.000  |

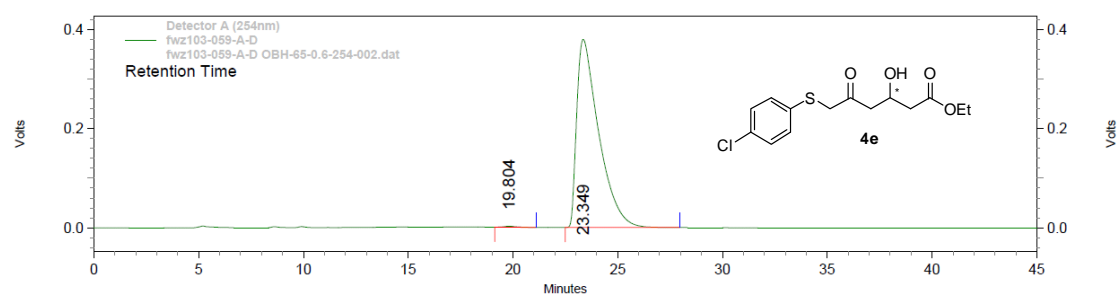

| Detector A (254nm) |                |          |         |        |          |
|--------------------|----------------|----------|---------|--------|----------|
| Pk #               | Retention Time | Area     | Area %  | Height | Height % |
| 1                  | 19.804         | 80305    | 0.290   | 1805   | 0.474    |
| 2                  | 23.349         | 27638756 | 99.710  | 378898 | 99.526   |
| Totals             |                | 27719061 | 100.000 | 380703 | 100.000  |

**Table 2, entry 5:**

The enantiomeric excess of methyl 6-chloro-5,5-diethoxy-3-hydroxyhexanoate **2f** was determined via its corresponding 4-chlorobenzethiol substituted derivative **4f** (deprotection of **2f** and then substituted with 4-chlorobenzethiol) by HPLC on chiralcel OB-H column.

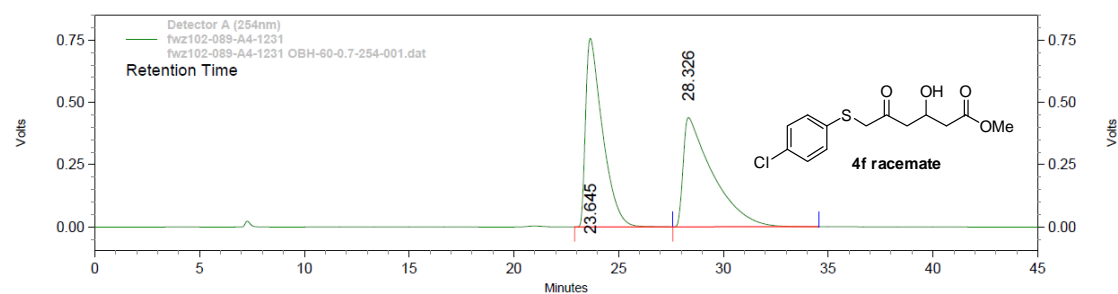

| Detector A (254nm) |                |          |         |         |          |
|--------------------|----------------|----------|---------|---------|----------|
| Pk #               | Retention Time | Area     | Area %  | Height  | Height % |
| 1                  | 23.645         | 42638851 | 49.915  | 757083  | 63.304   |
| 2                  | 28.326         | 42783785 | 50.085  | 438866  | 36.696   |
| Totals             |                | 85422637 | 100.000 | 1195948 | 100.000  |

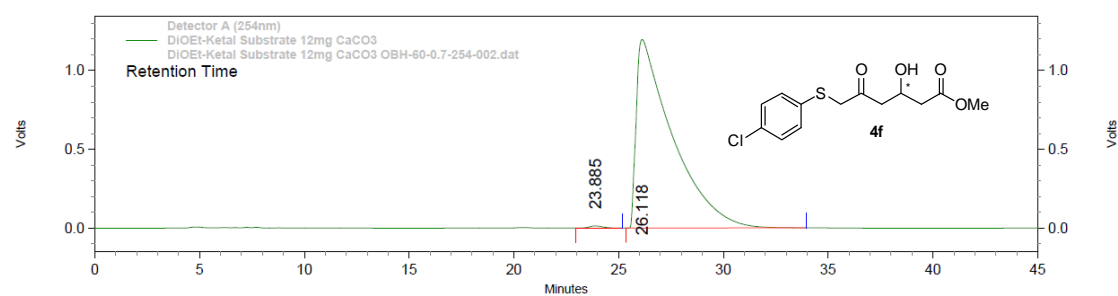

| Detector A (254nm) |                |           |         |         |          |
|--------------------|----------------|-----------|---------|---------|----------|
| Pk #               | Retention Time | Area      | Area %  | Height  | Height % |
| 1                  | 23.885         | 574315    | 0.397   | 13387   | 1.106    |
| 2                  | 26.118         | 144055084 | 99.603  | 1196612 | 98.894   |
| Totals             |                | 144629400 | 100.000 | 1209999 | 100.000  |

**Table 2, entry 6:**

The enantiomeric excess of methyl 4-(2-((benzyloxy)methyl)-1,3-dioxolan-2-yl)-3-hydroxybutanoate **2g** was determined by HPLC on chiralpak IB-3 column.

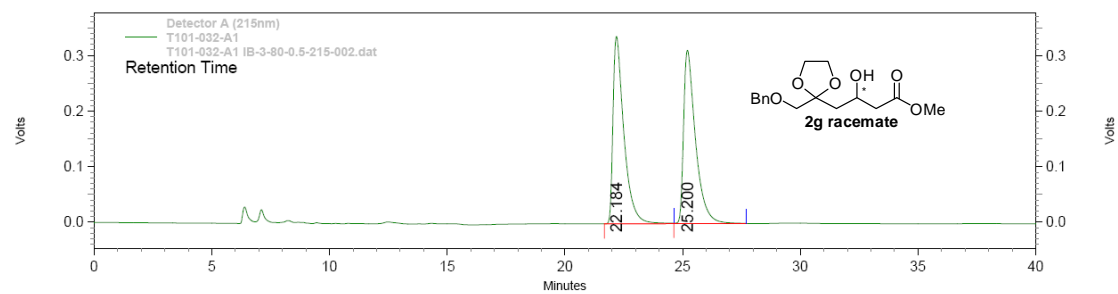

**Detector A (215nm)**

| Pk #   | Retention Time | Area     | Area %  | Height | Height % |
|--------|----------------|----------|---------|--------|----------|
| 1      | 22.184         | 10872390 | 49.843  | 337144 | 51.959   |
| 2      | 25.200         | 10940836 | 50.157  | 311717 | 48.041   |
| Totals |                | 21813227 | 100.000 | 648861 | 100.000  |

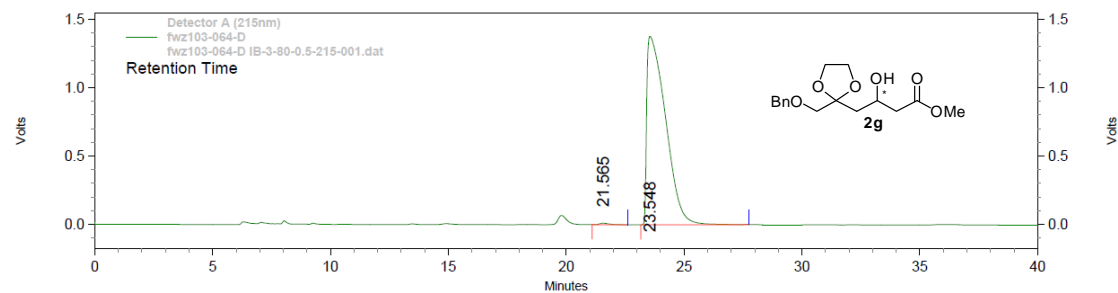

**Detector A (215nm)**

| Pk #   | Retention Time | Area     | Area %  | Height  | Height % |
|--------|----------------|----------|---------|---------|----------|
| 1      | 21.565         | 293563   | 0.384   | 10908   | 0.785    |
| 2      | 23.548         | 76203811 | 99.616  | 1378286 | 99.215   |
| Totals |                | 76497374 | 100.000 | 1389194 | 100.000  |

**Table 2, entry 7:**

The enantiomeric excess of ethyl 4-(2-((benzyloxy)methyl)-1,3-dioxolan-2-yl)-3-hydroxybutanoate **2h** was determined by HPLC on chiralpak IB-3 column.

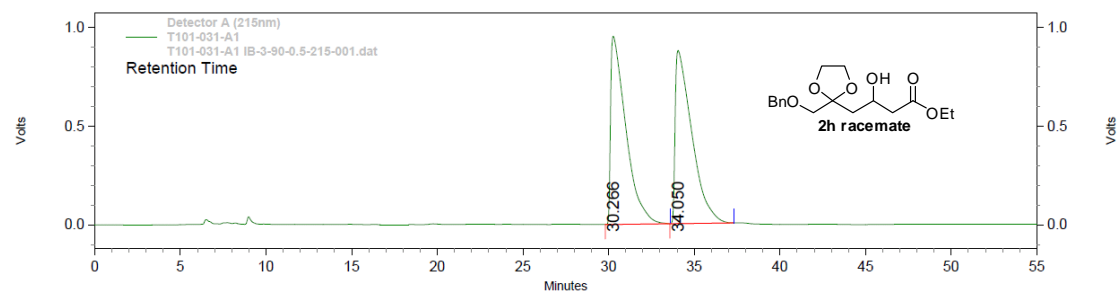

| Detector A (215nm) |                |           |         |         |          |
|--------------------|----------------|-----------|---------|---------|----------|
| PK #               | Retention Time | Area      | Area %  | Height  | Height % |
| 1                  | 30.266         | 59101912  | 49.945  | 955375  | 52.087   |
| 2                  | 34.050         | 59231129  | 50.055  | 878807  | 47.913   |
| Totals             |                | 118333040 | 100.000 | 1834182 | 100.000  |

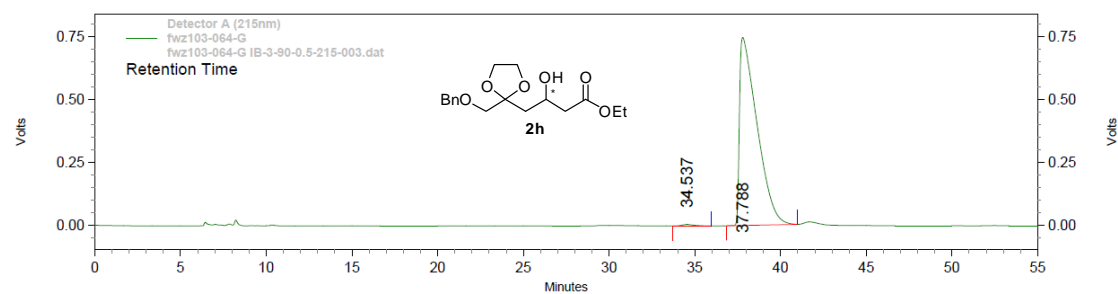

| Detector A (215nm) |                |          |         |        |          |
|--------------------|----------------|----------|---------|--------|----------|
| PK #               | Retention Time | Area     | Area %  | Height | Height % |
| 1                  | 34.537         | 227091   | 0.426   | 5487   | 0.727    |
| 2                  | 37.788         | 53069536 | 99.574  | 748809 | 99.273   |
| Totals             |                | 53296627 | 100.000 | 754296 | 100.000  |

**Table 2, entry 8:**

The enantiomeric excess of *tert*-butyl 4-(2-((benzyloxy)methyl)-1,3-dioxolan-2-yl)-3-hydroxybutanoate **2i** was determined by HPLC on chiralcel OJ-H column.

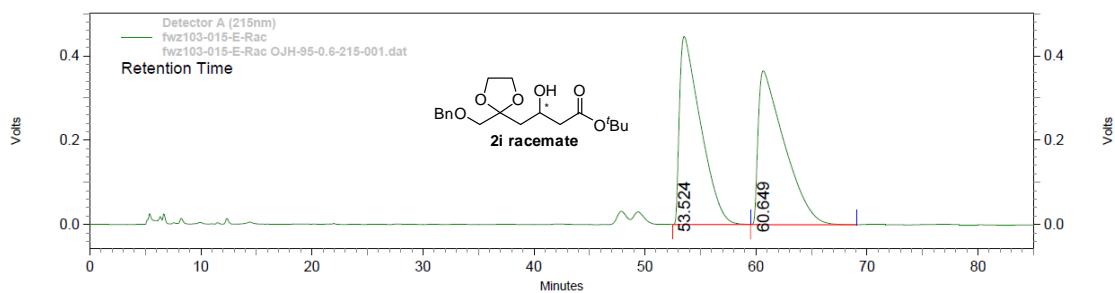

**Detector A (215nm)**

| Pk # | Retention Time | Area     | Area % | Height | Height % |
|------|----------------|----------|--------|--------|----------|
| 1    | 53.524         | 58974003 | 49.698 | 446389 | 55.019   |
| 2    | 60.649         | 59689772 | 50.302 | 364952 | 44.981   |

|        |  |           |         |        |         |
|--------|--|-----------|---------|--------|---------|
| Totals |  | 118663775 | 100.000 | 811342 | 100.000 |
|--------|--|-----------|---------|--------|---------|

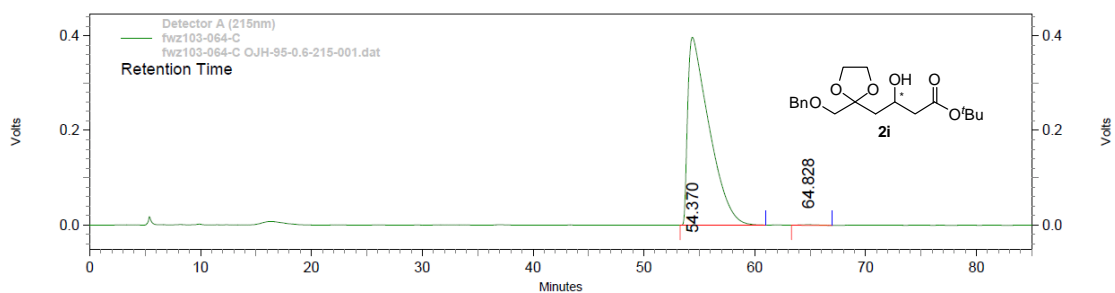

**Detector A (215nm)**

| Pk # | Retention Time | Area     | Area % | Height | Height % |
|------|----------------|----------|--------|--------|----------|
| 1    | 54.370         | 53397794 | 99.792 | 397042 | 99.720   |
| 2    | 64.828         | 111302   | 0.208  | 1116   | 0.280    |

|        |  |          |         |        |         |
|--------|--|----------|---------|--------|---------|
| Totals |  | 53509096 | 100.000 | 398157 | 100.000 |
|--------|--|----------|---------|--------|---------|



## 7. NMR spectra of the products

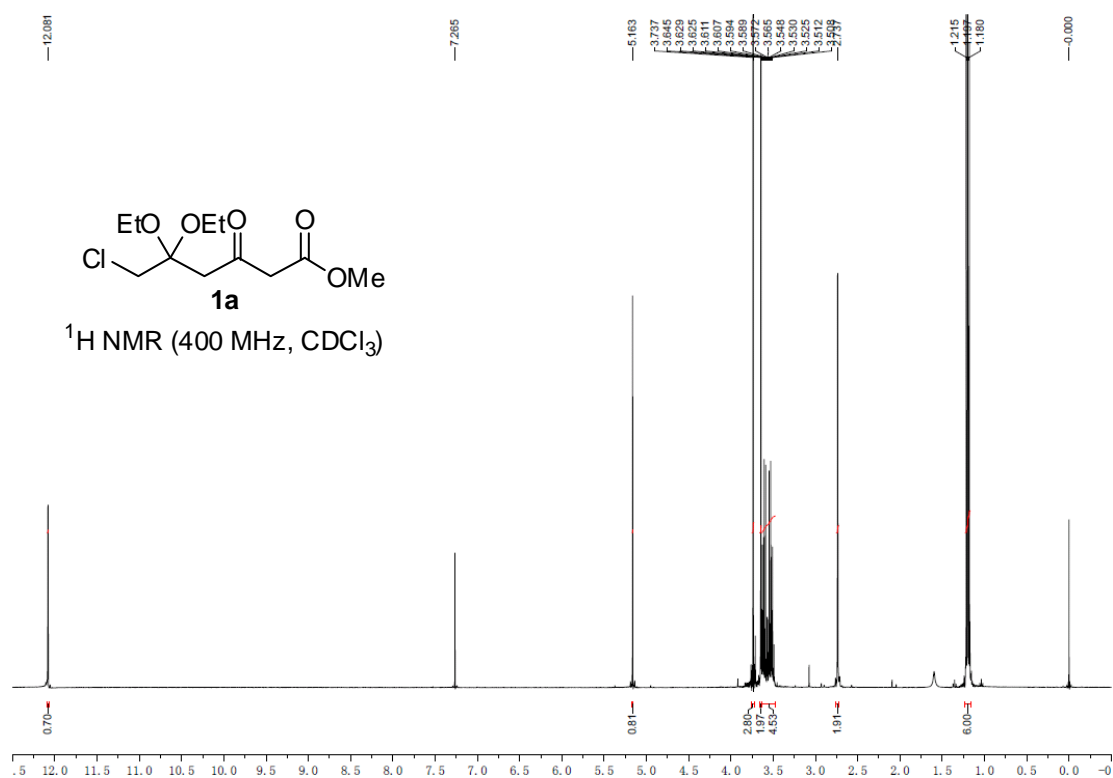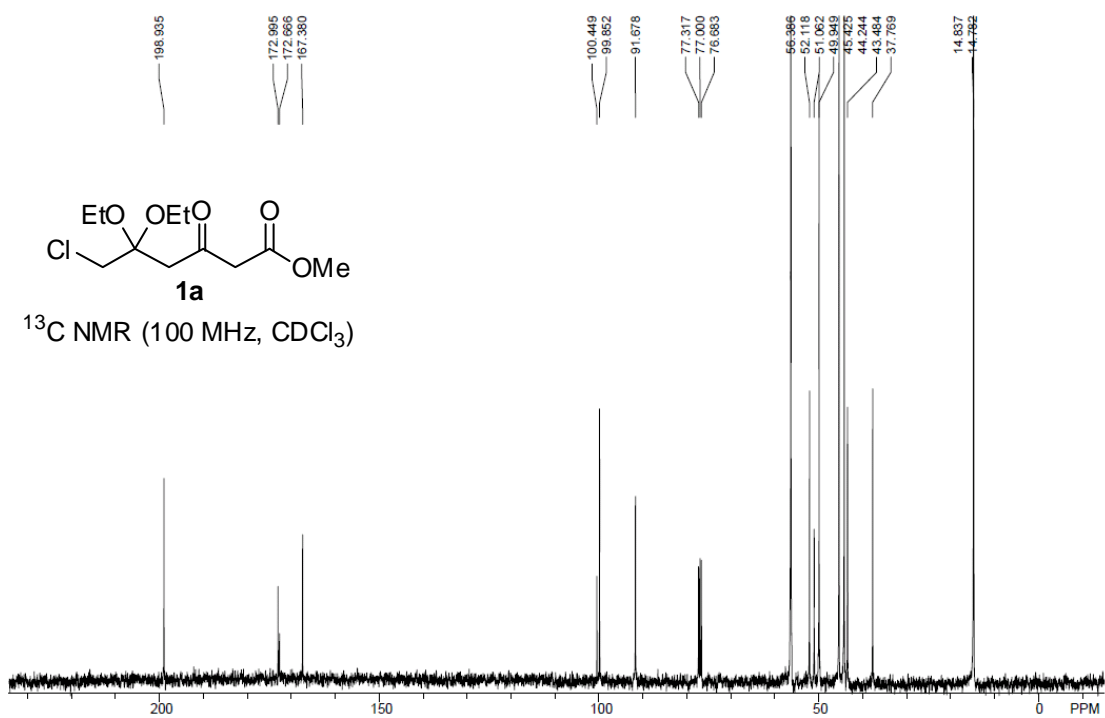

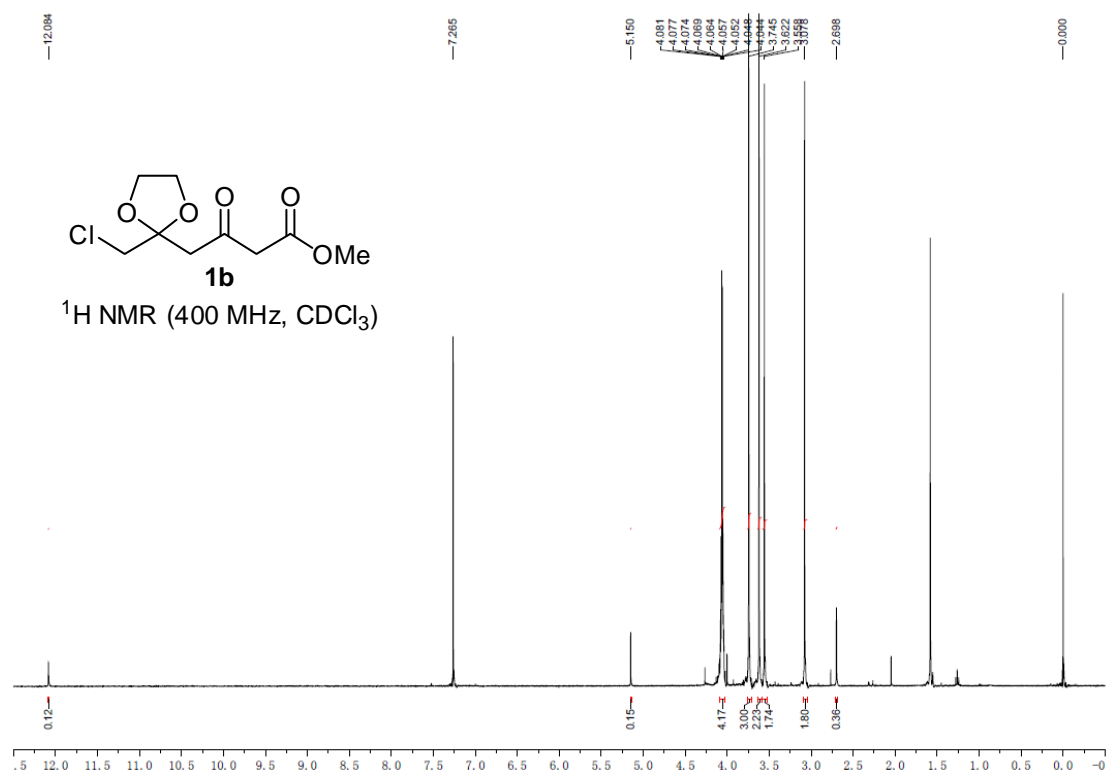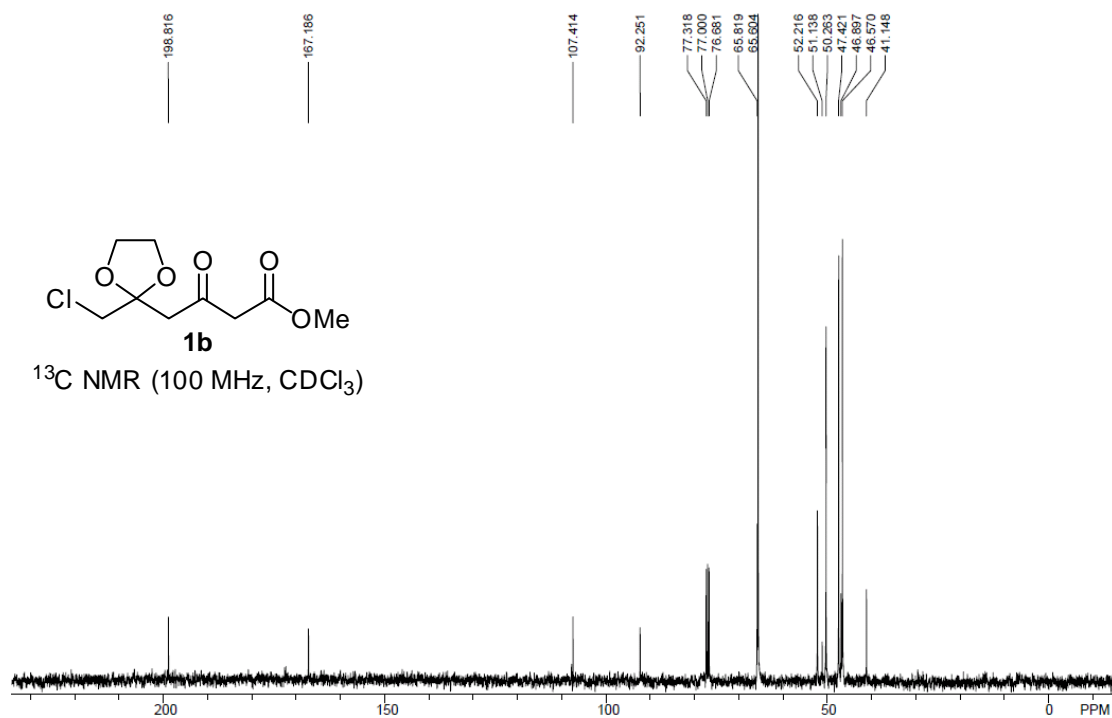

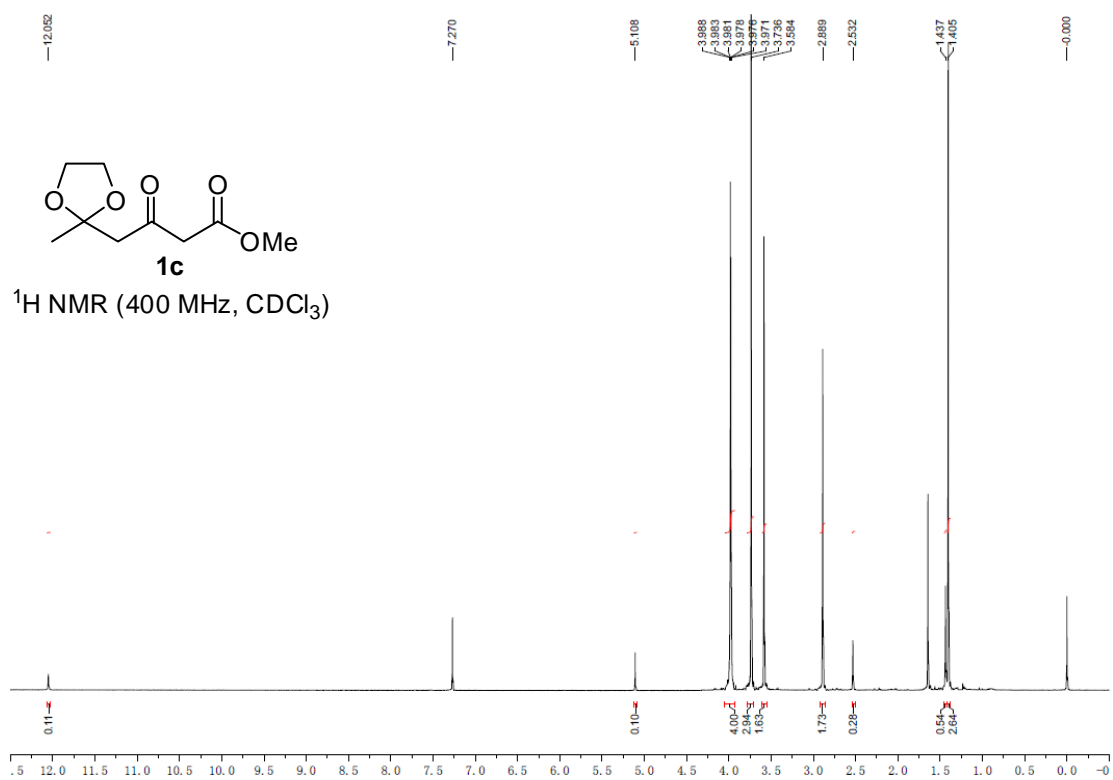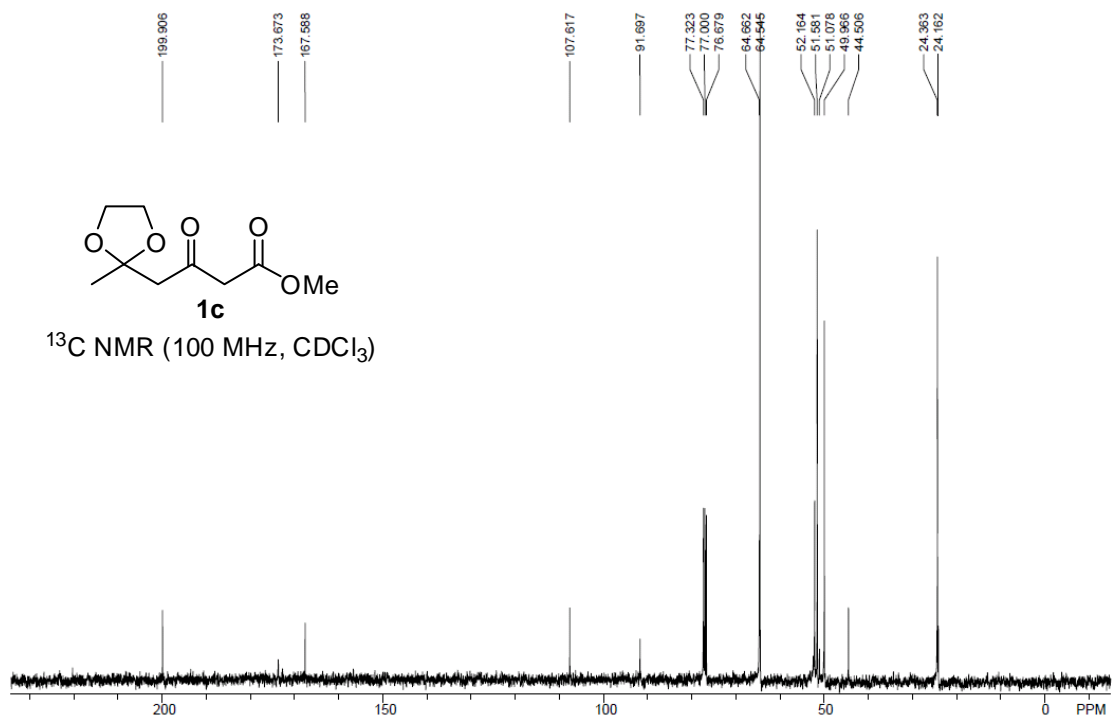

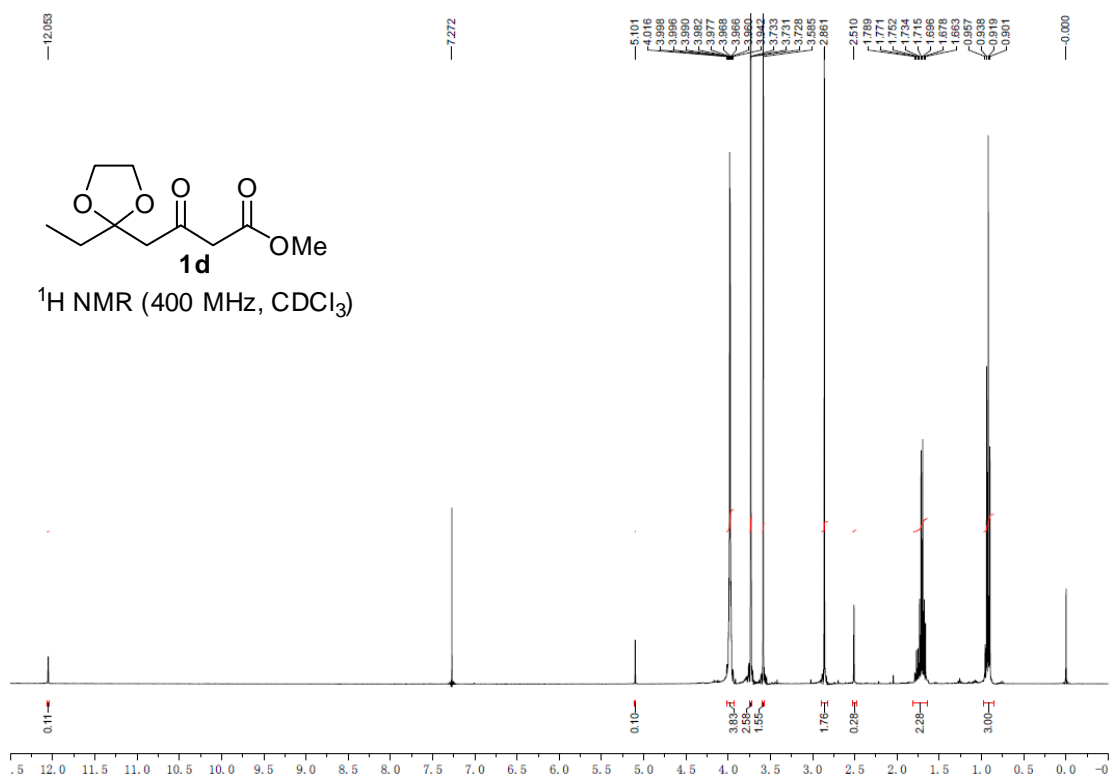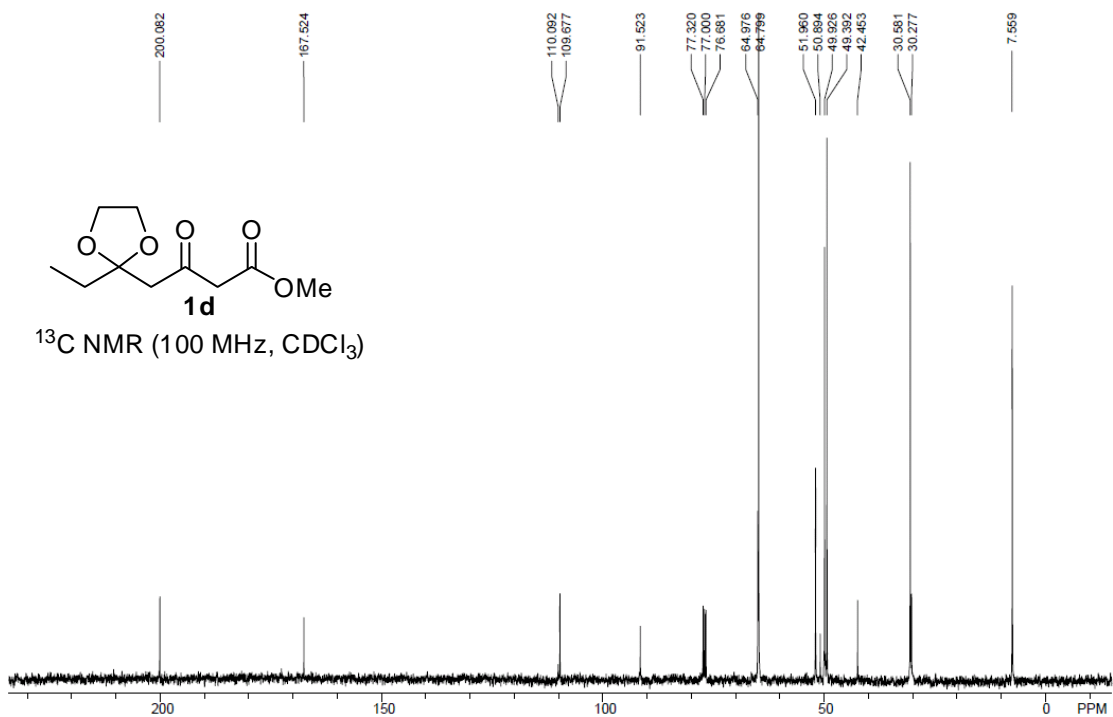

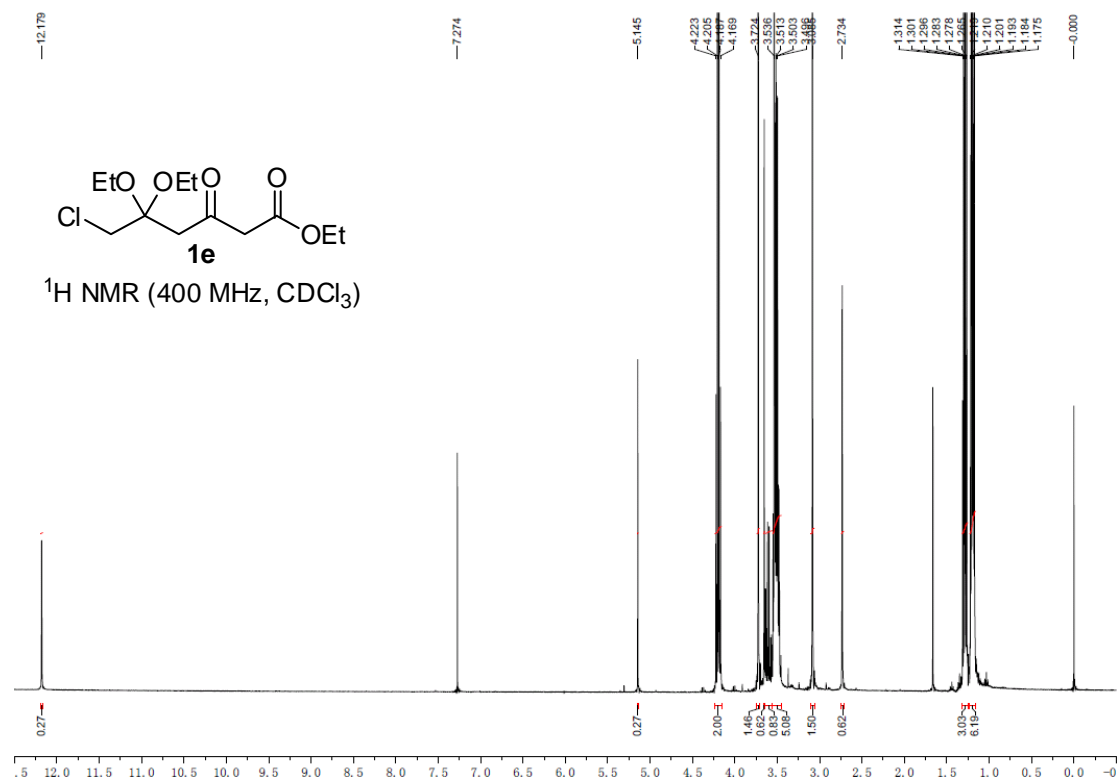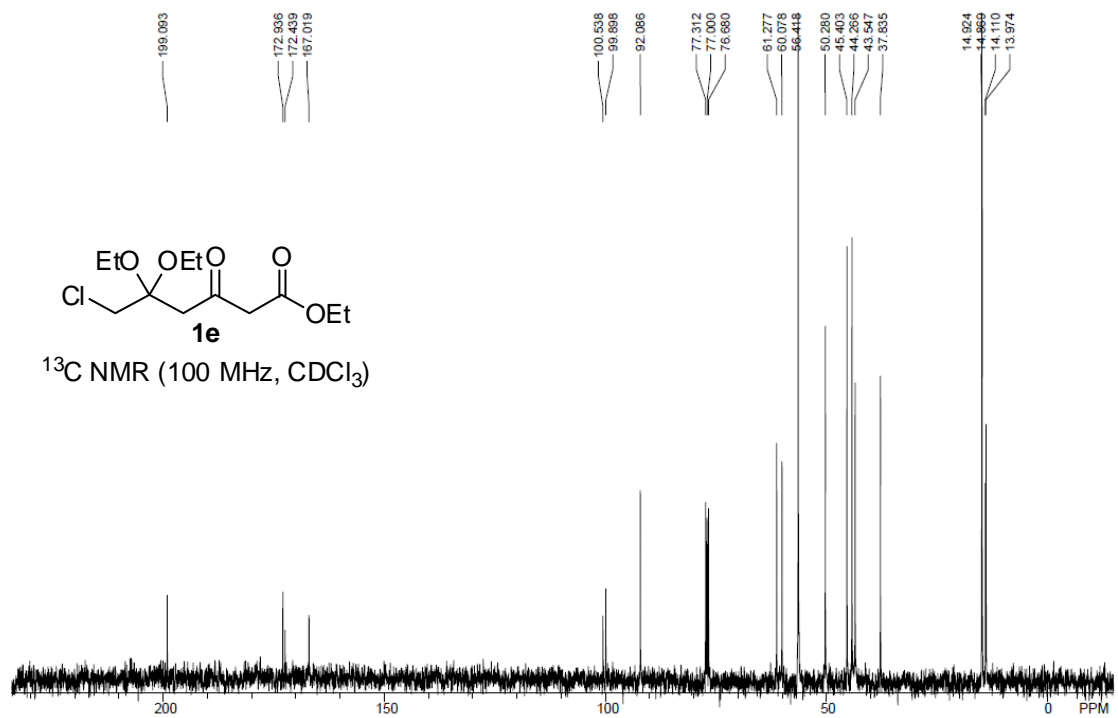

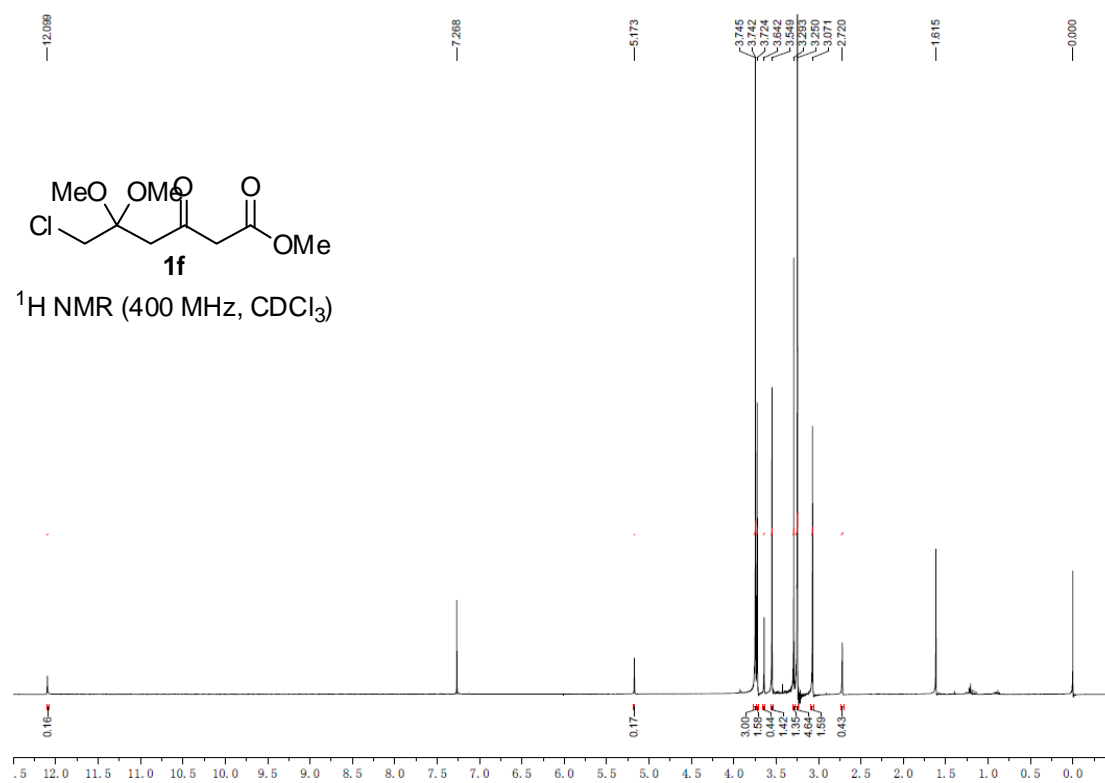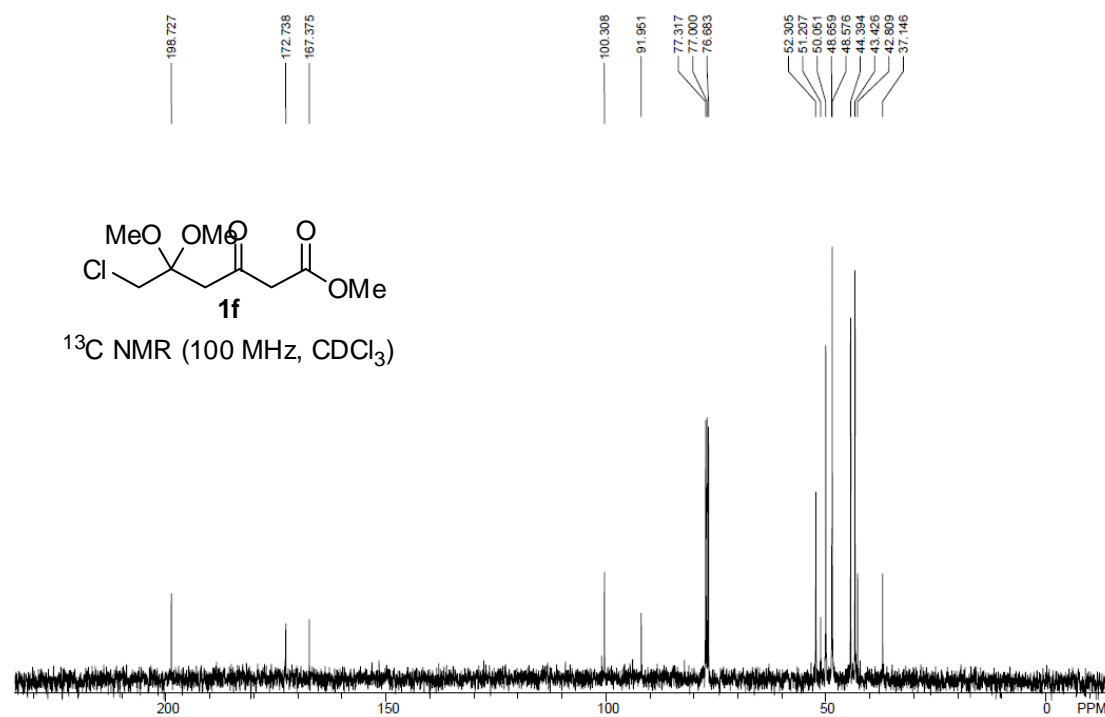

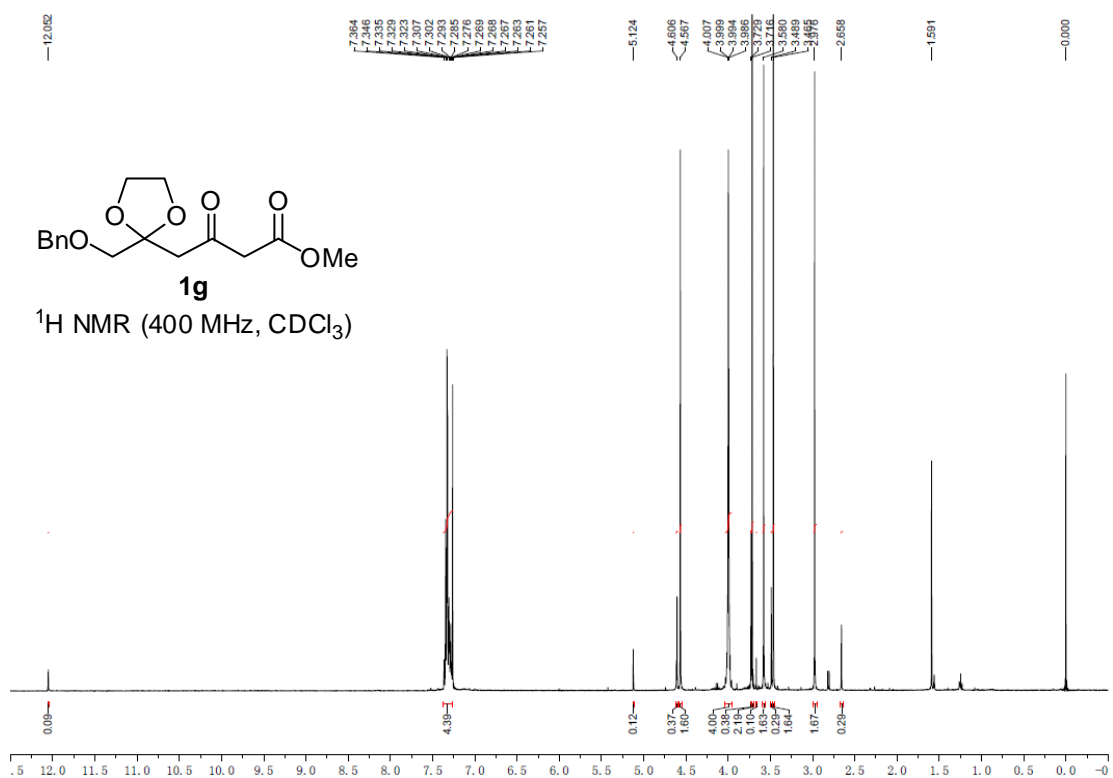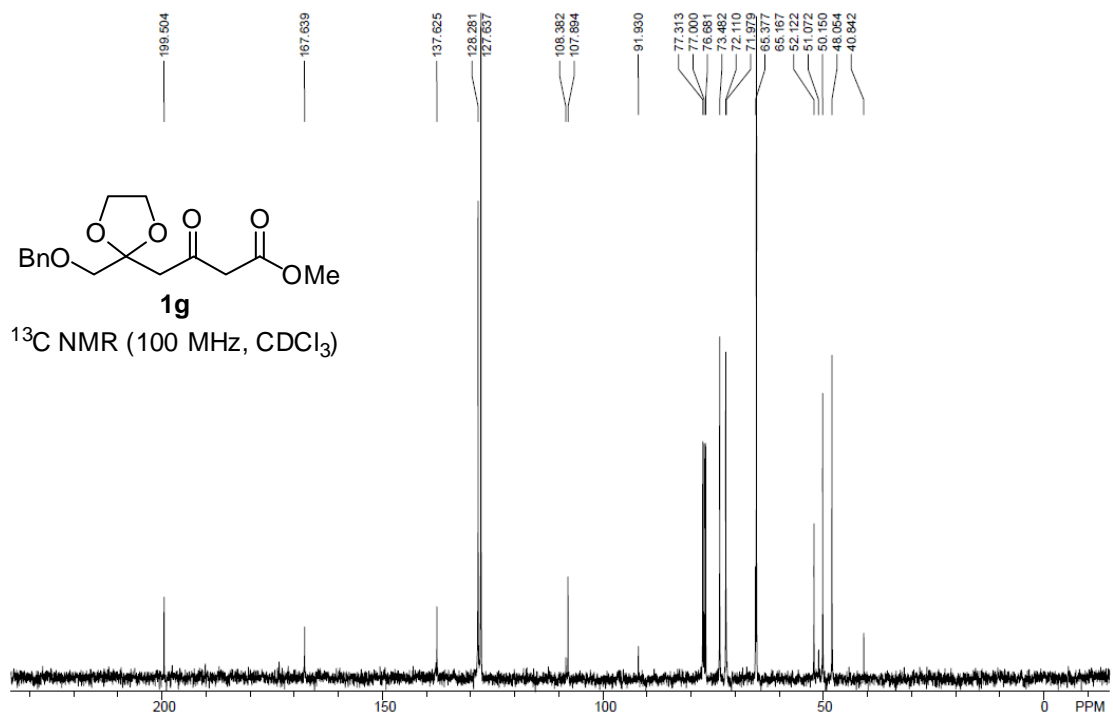





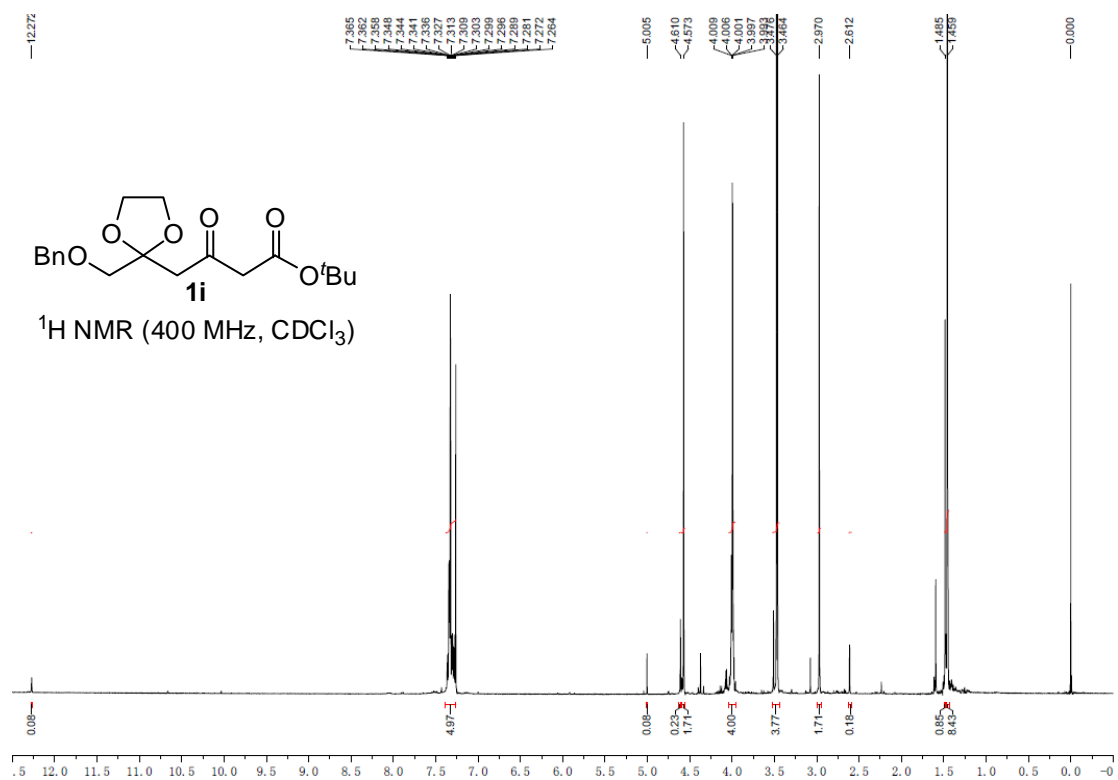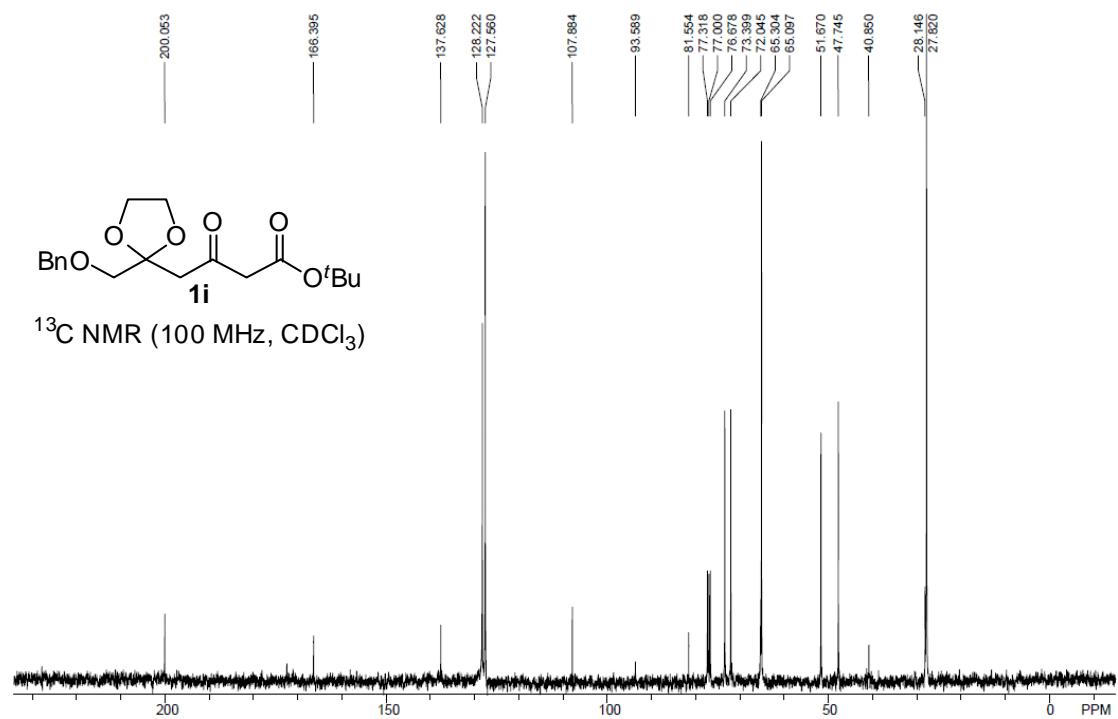

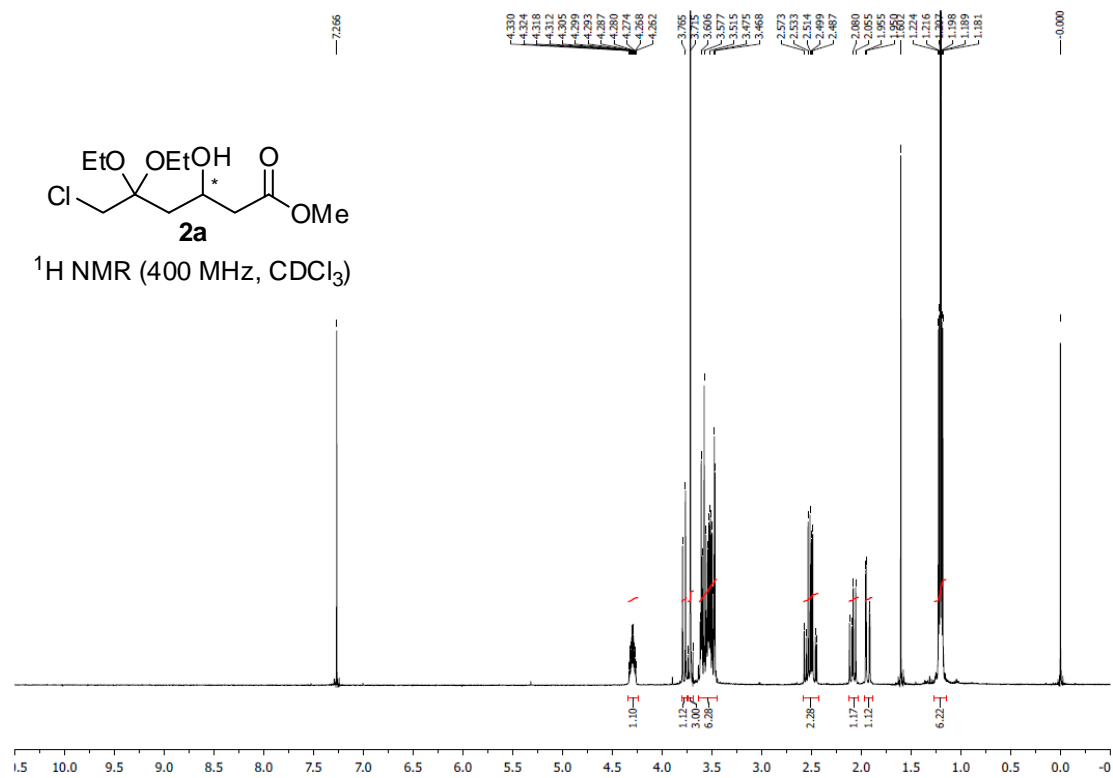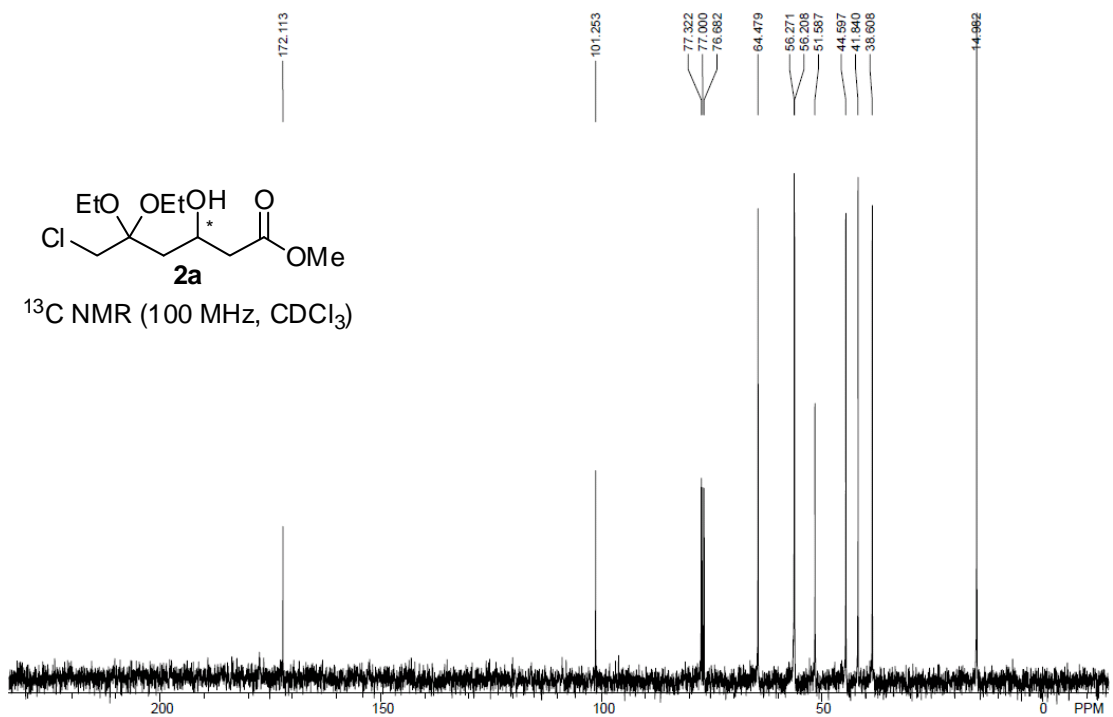

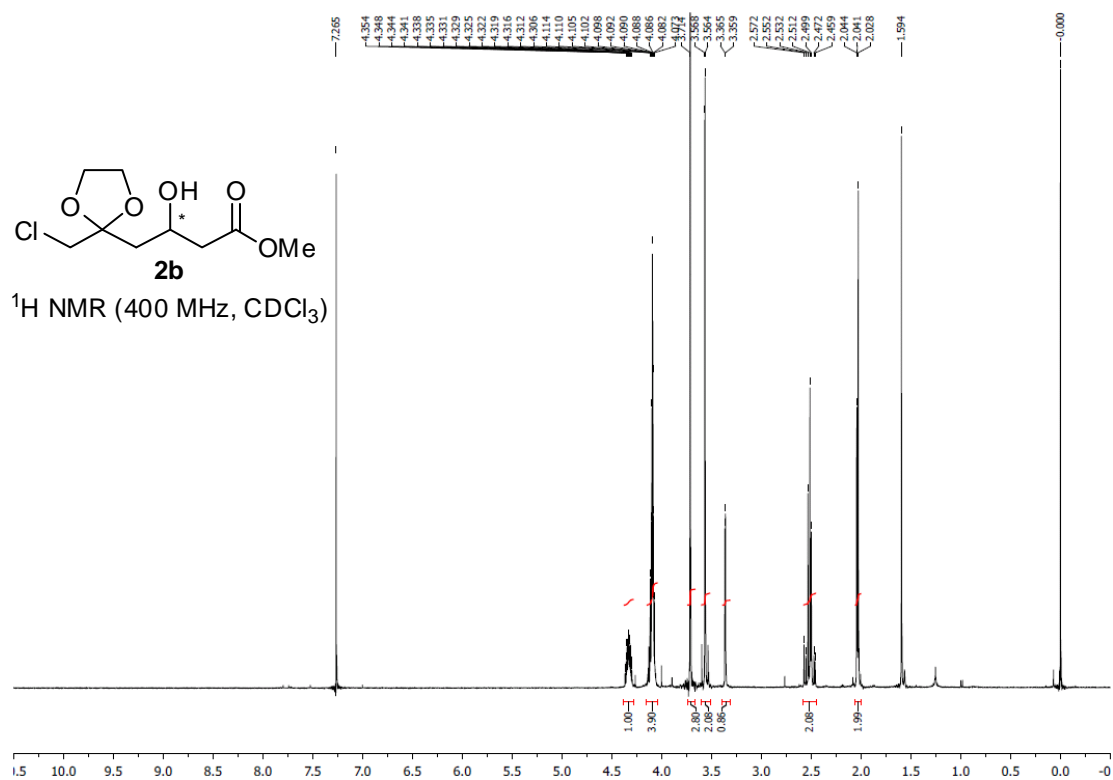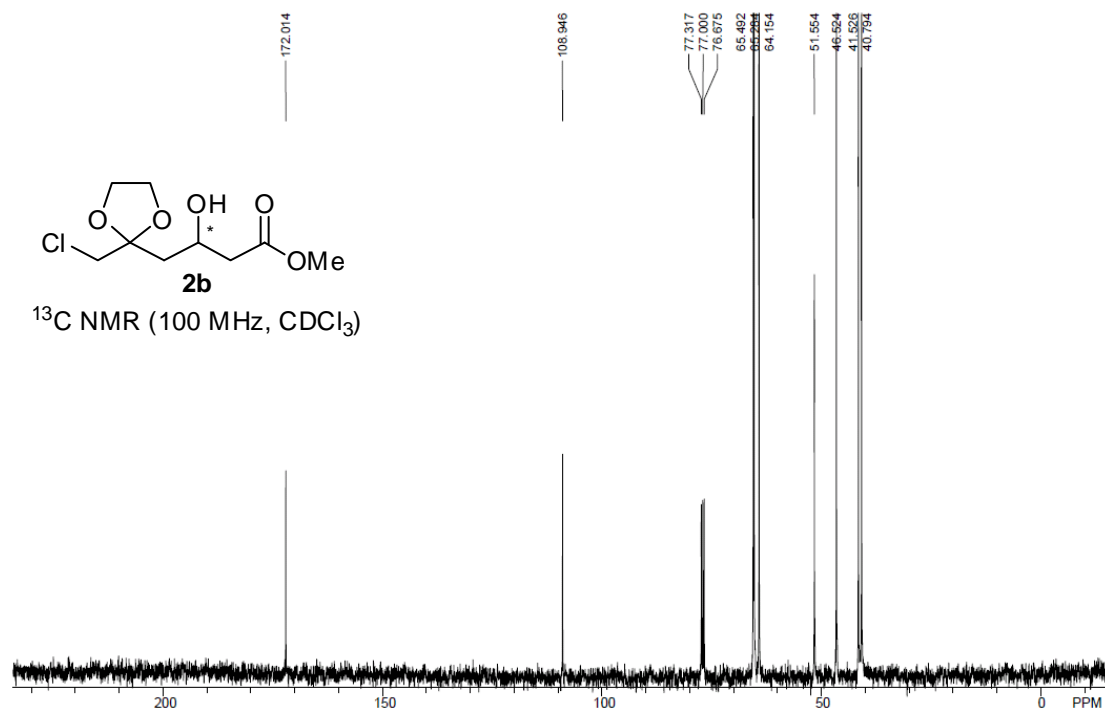

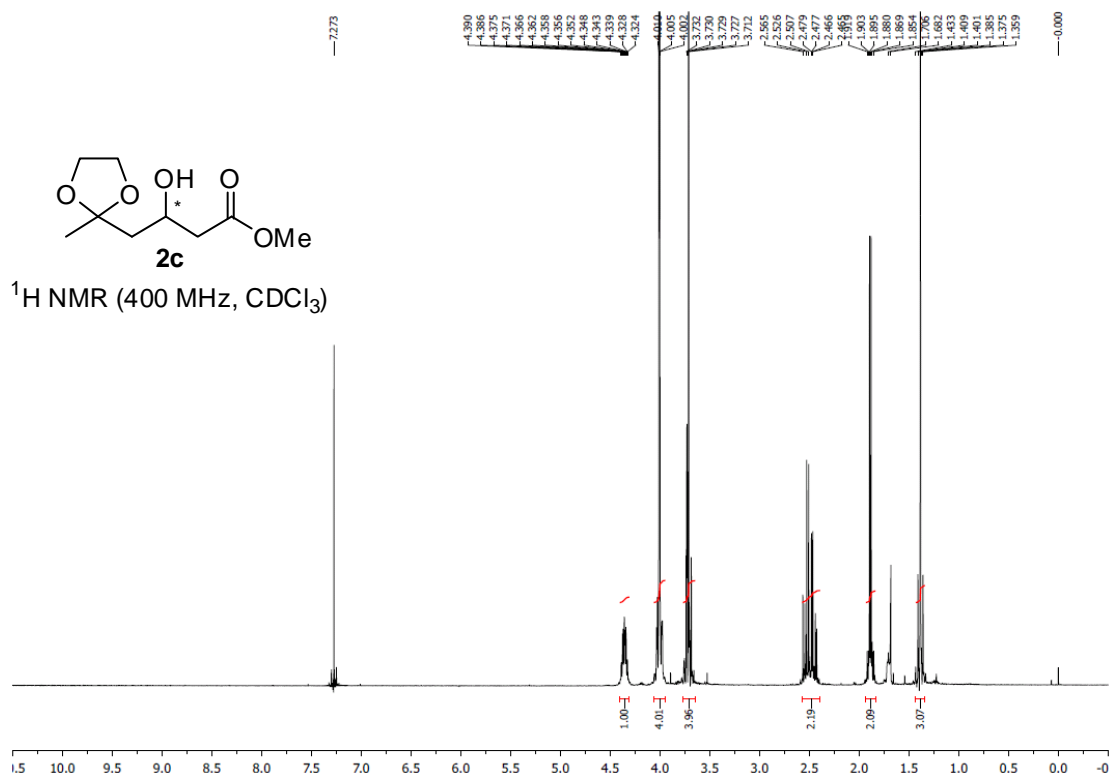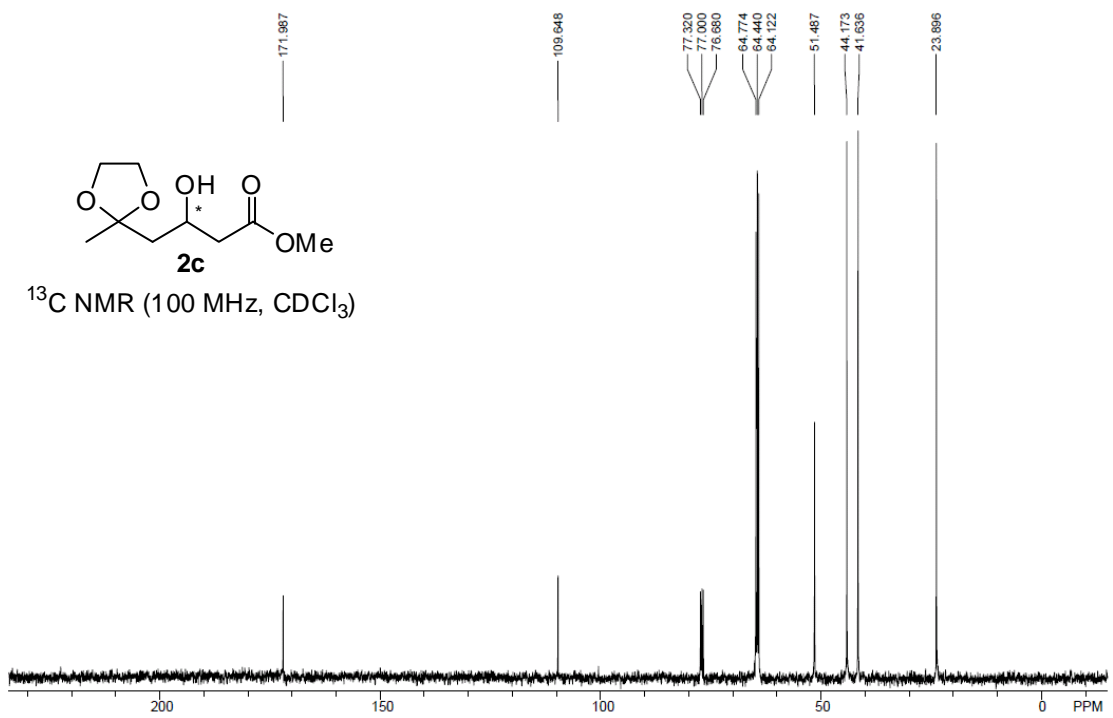

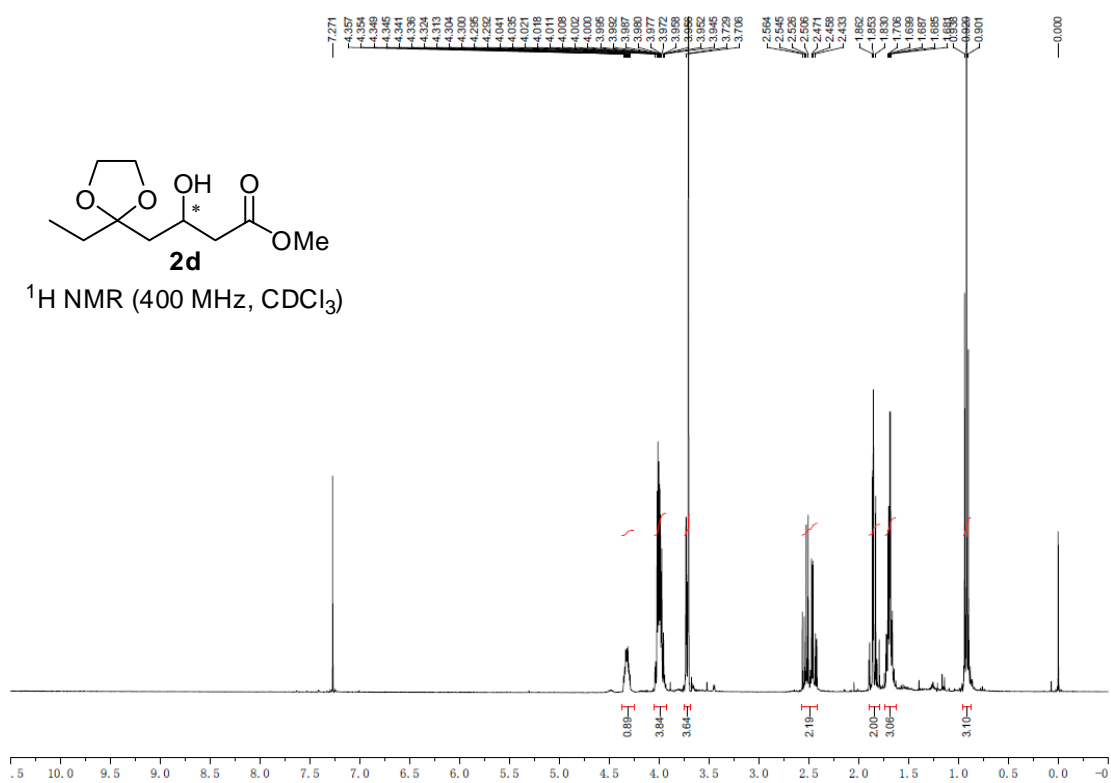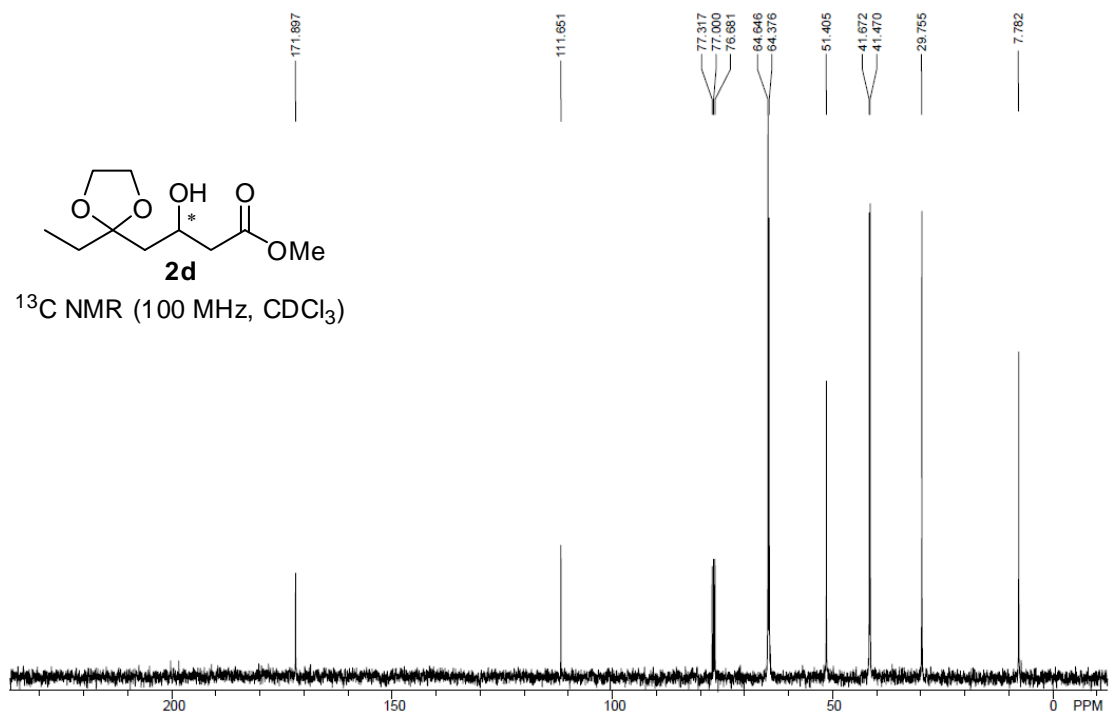

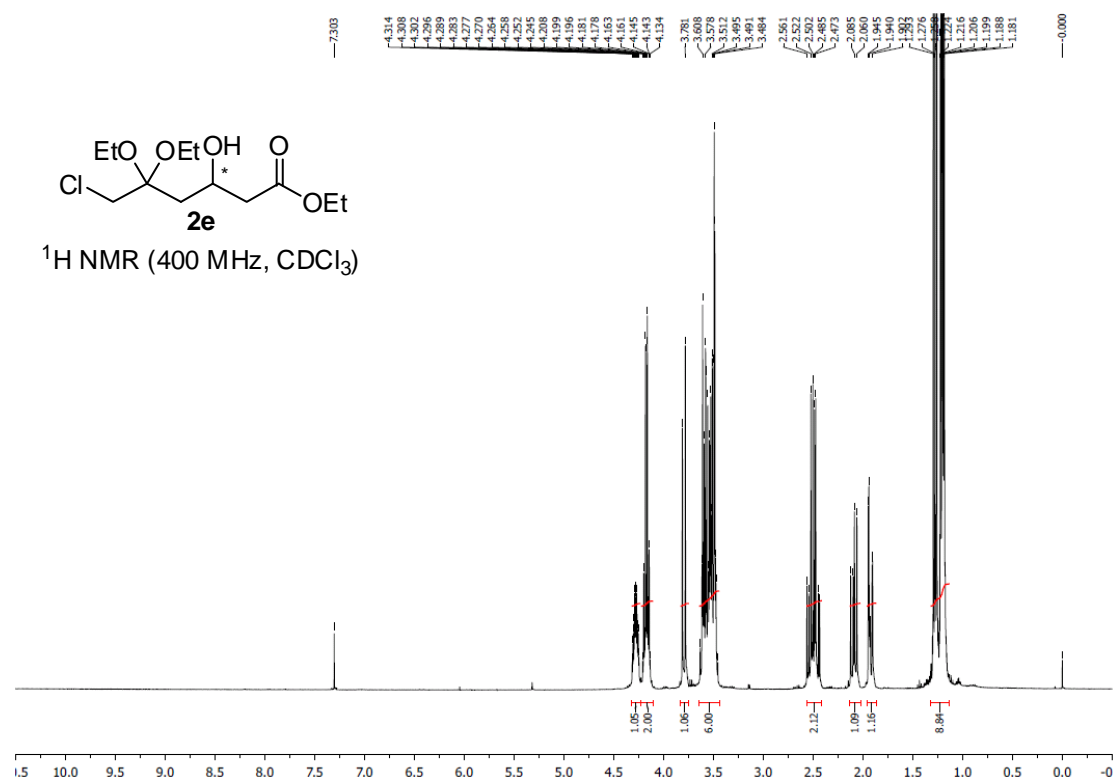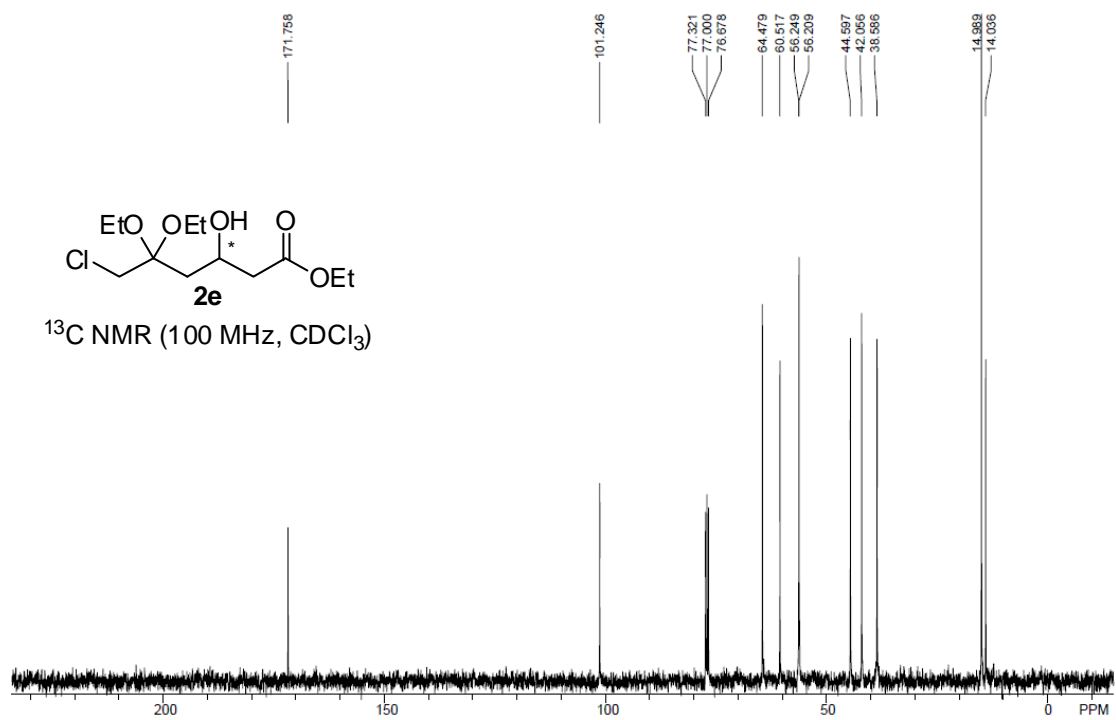

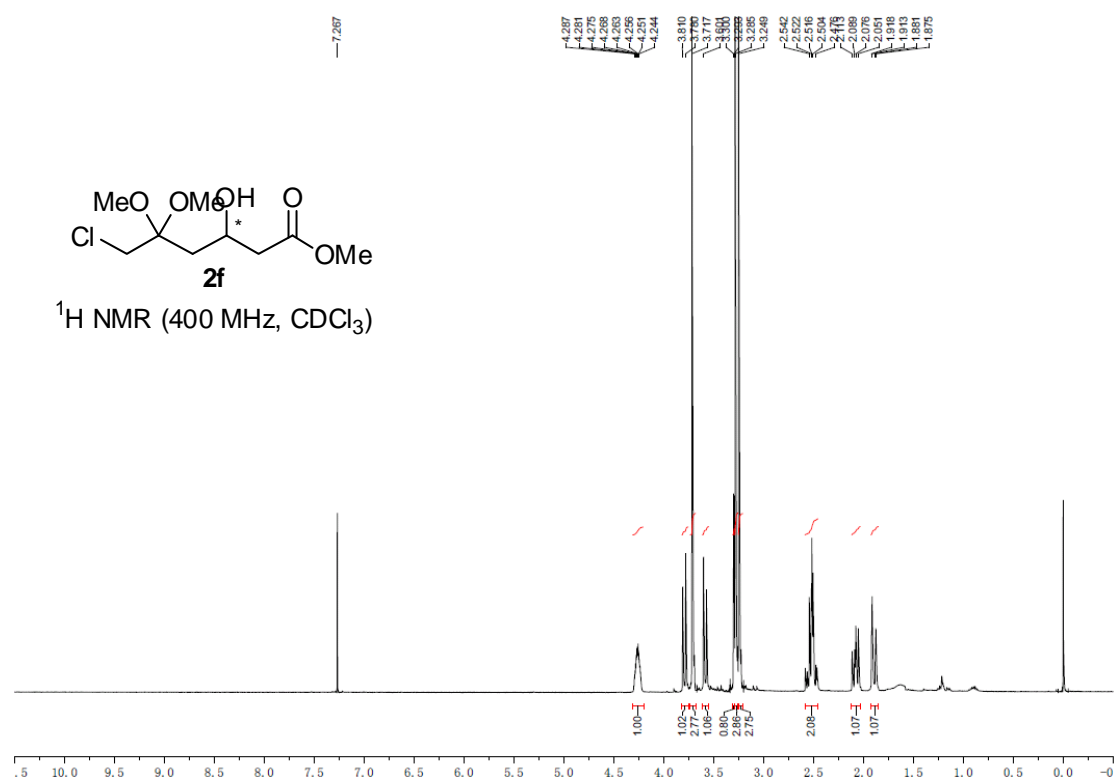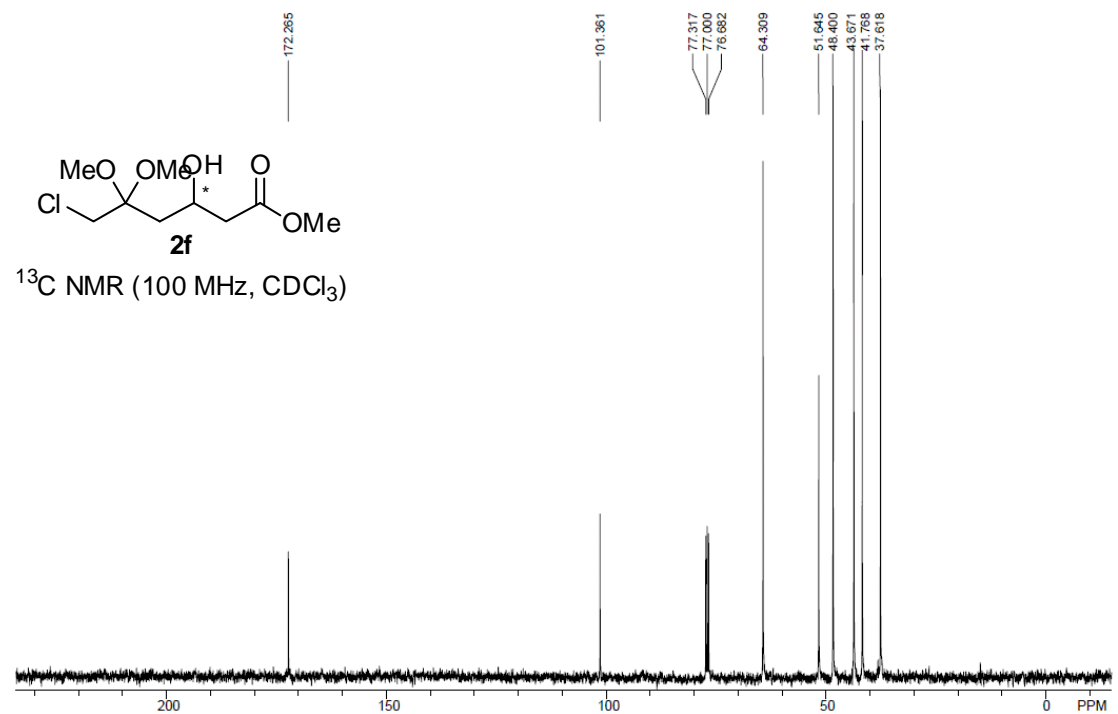

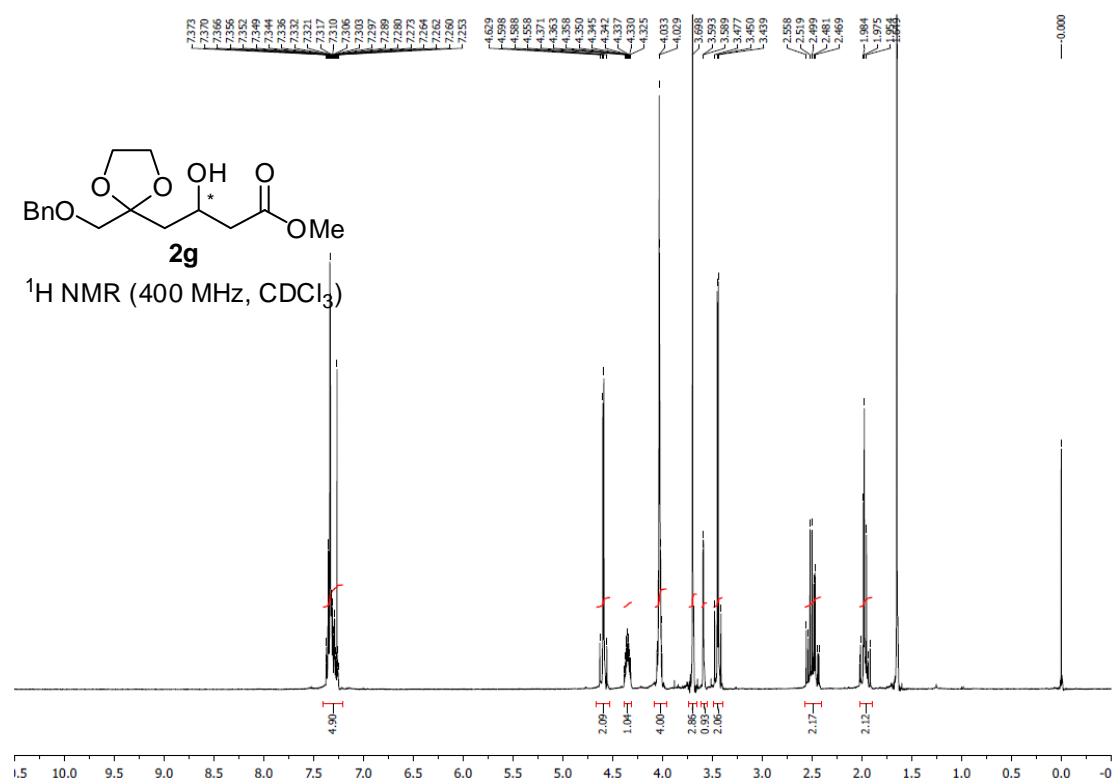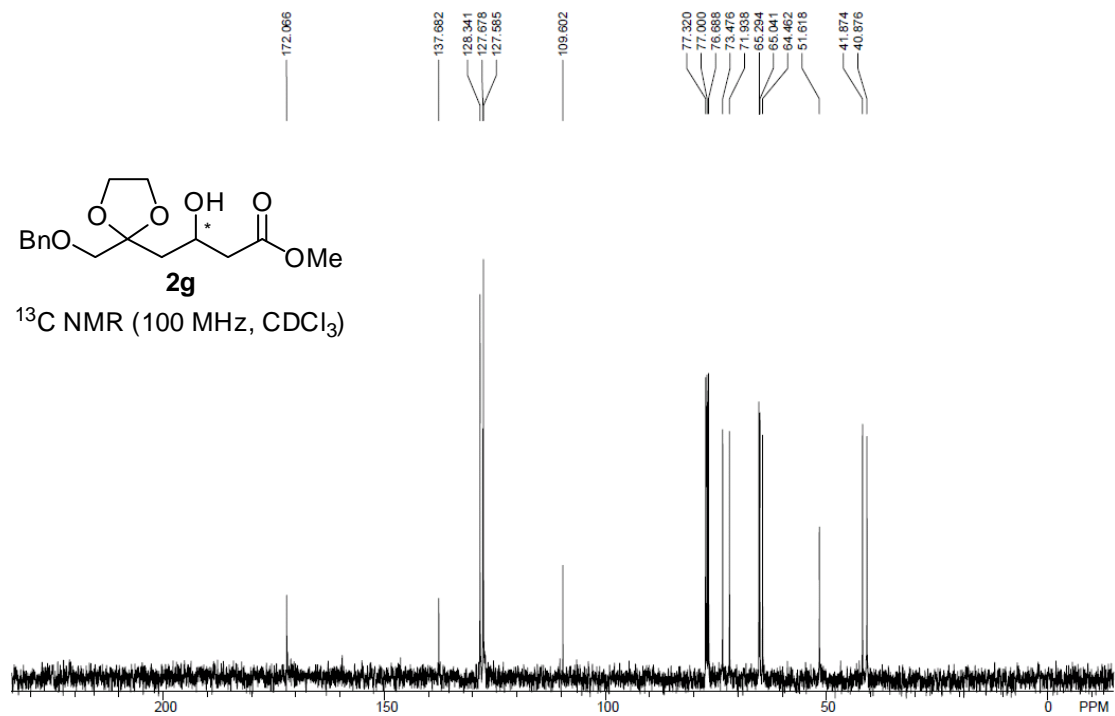



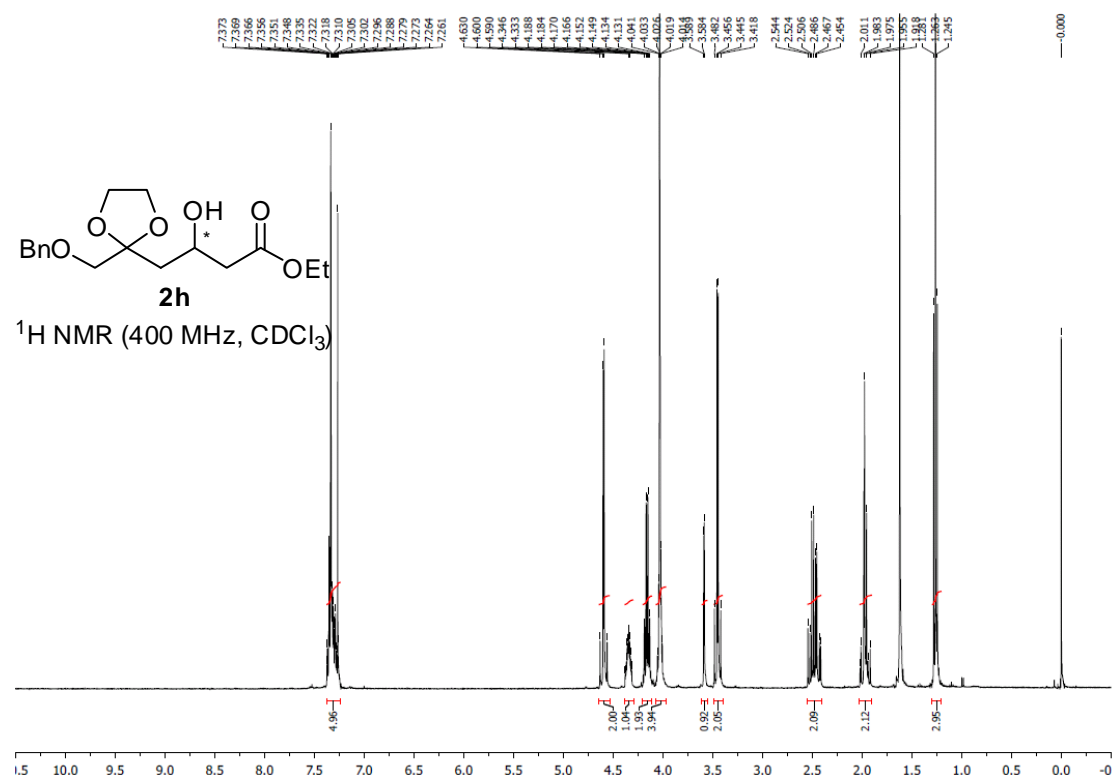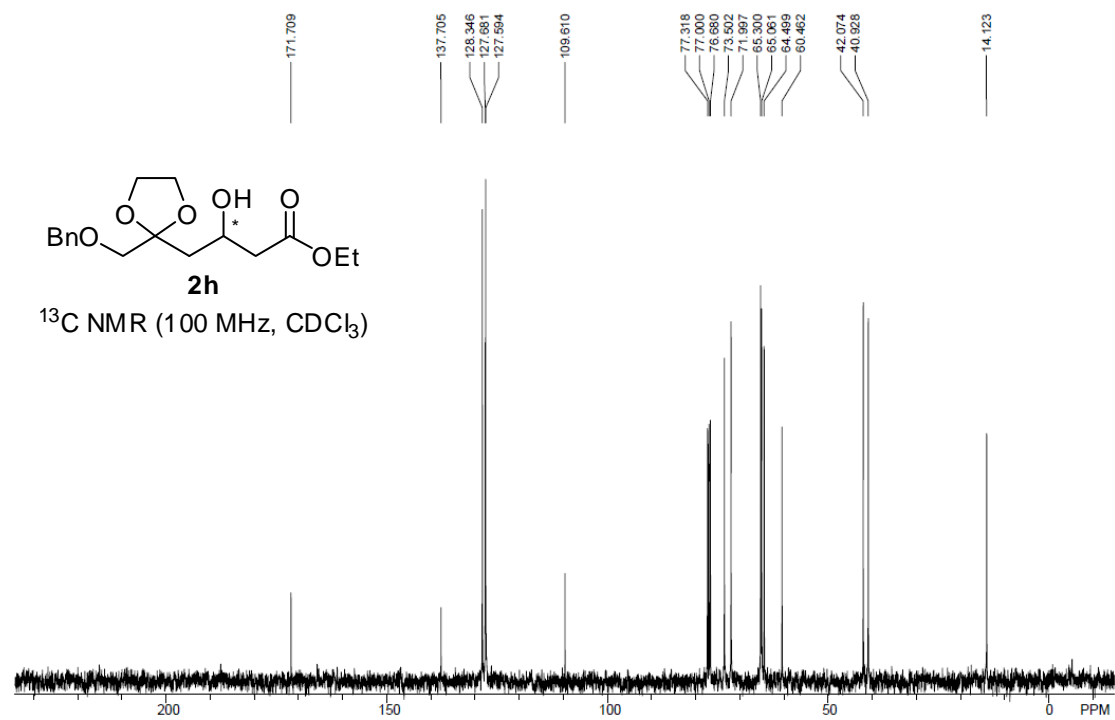

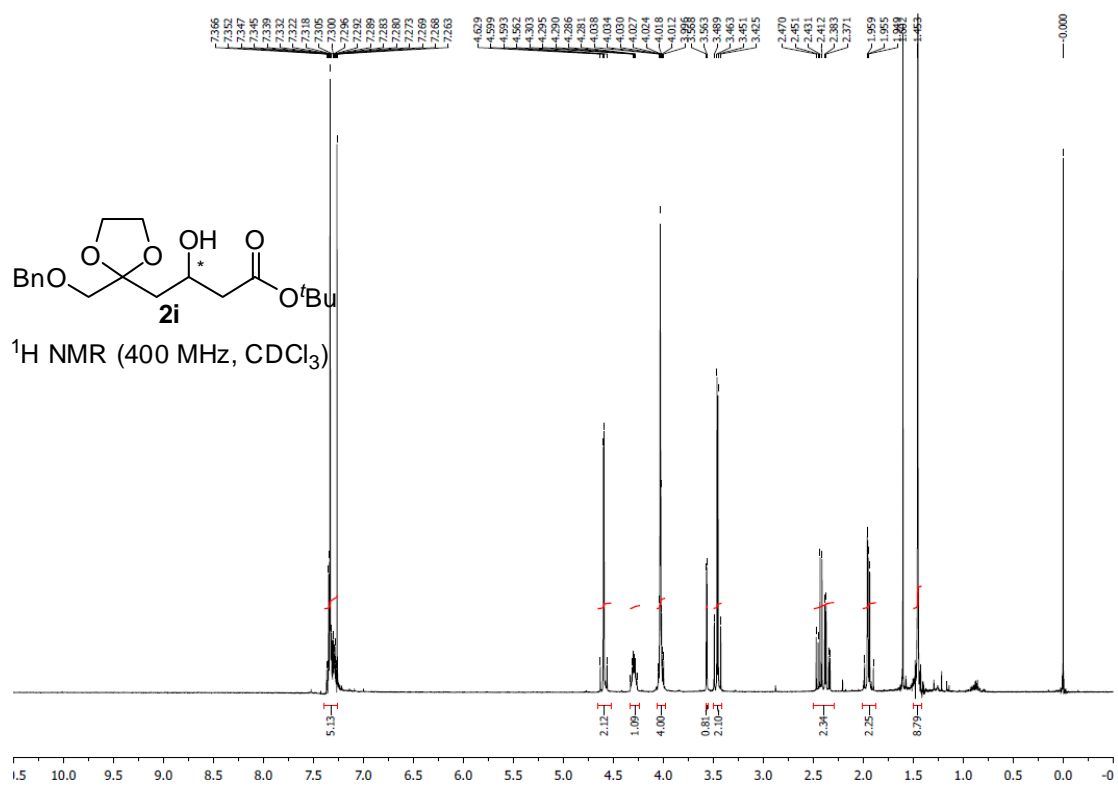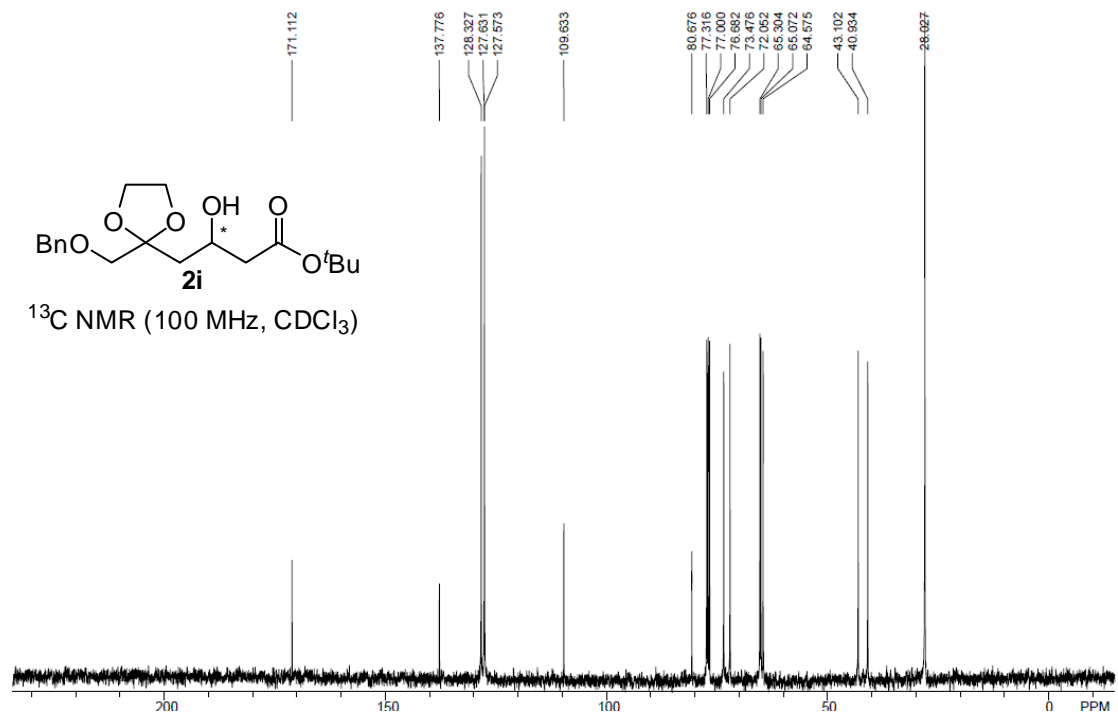

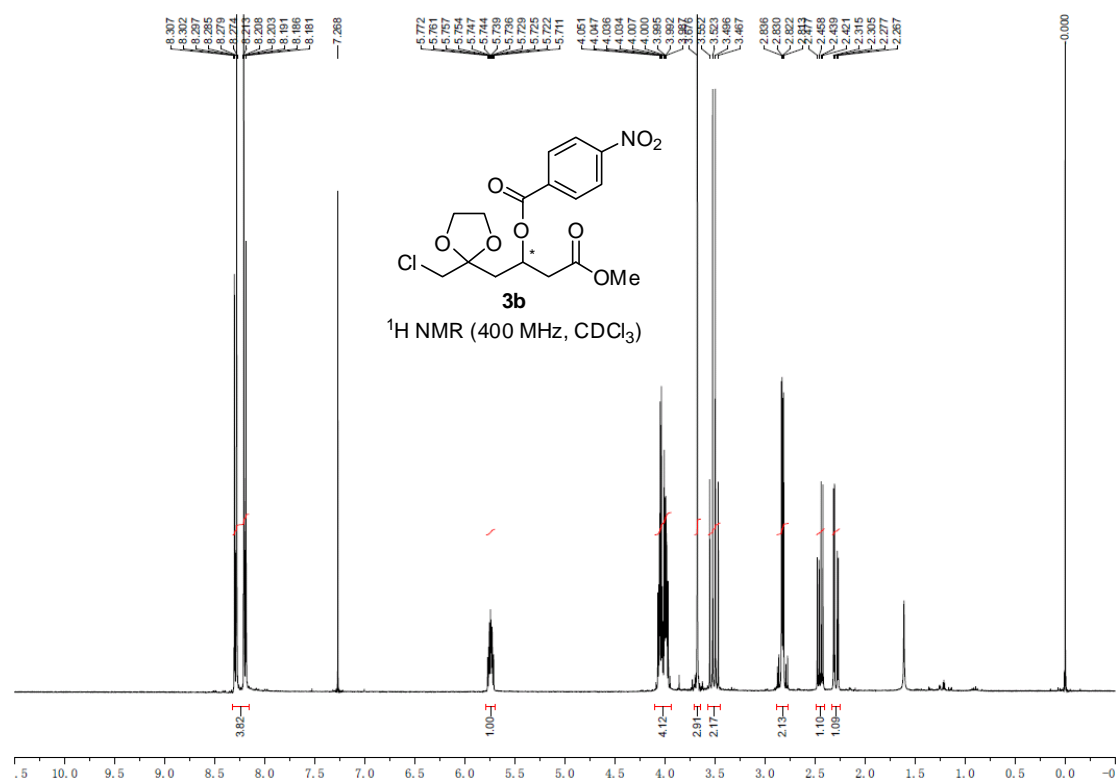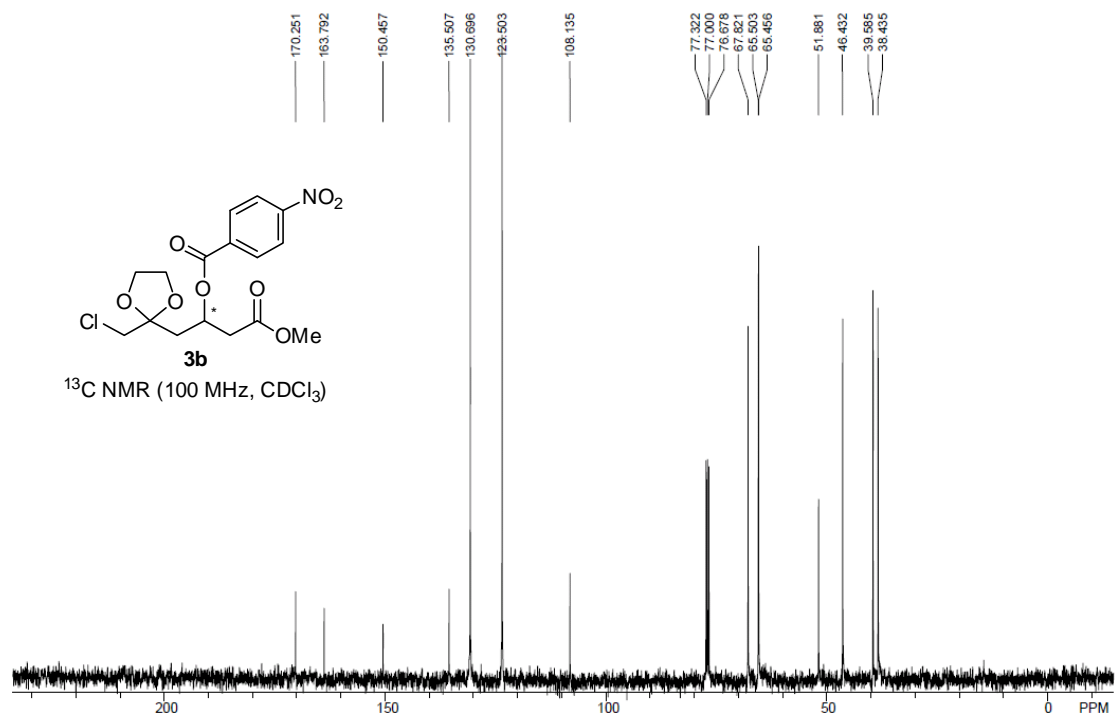

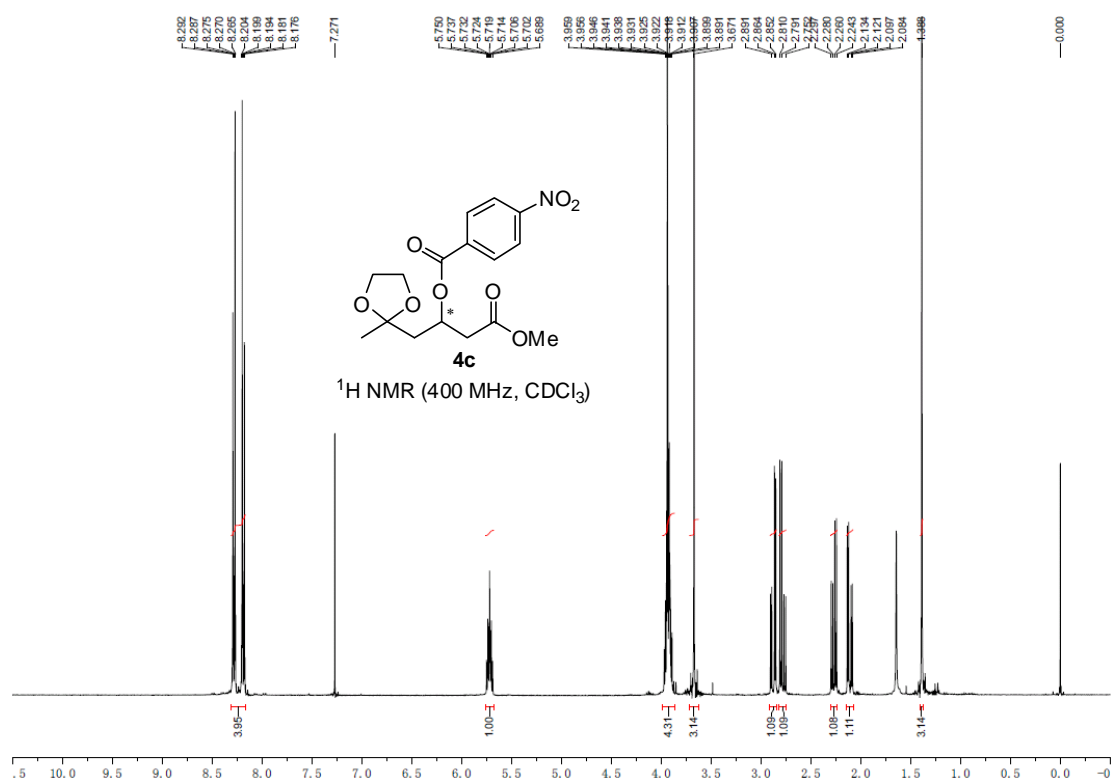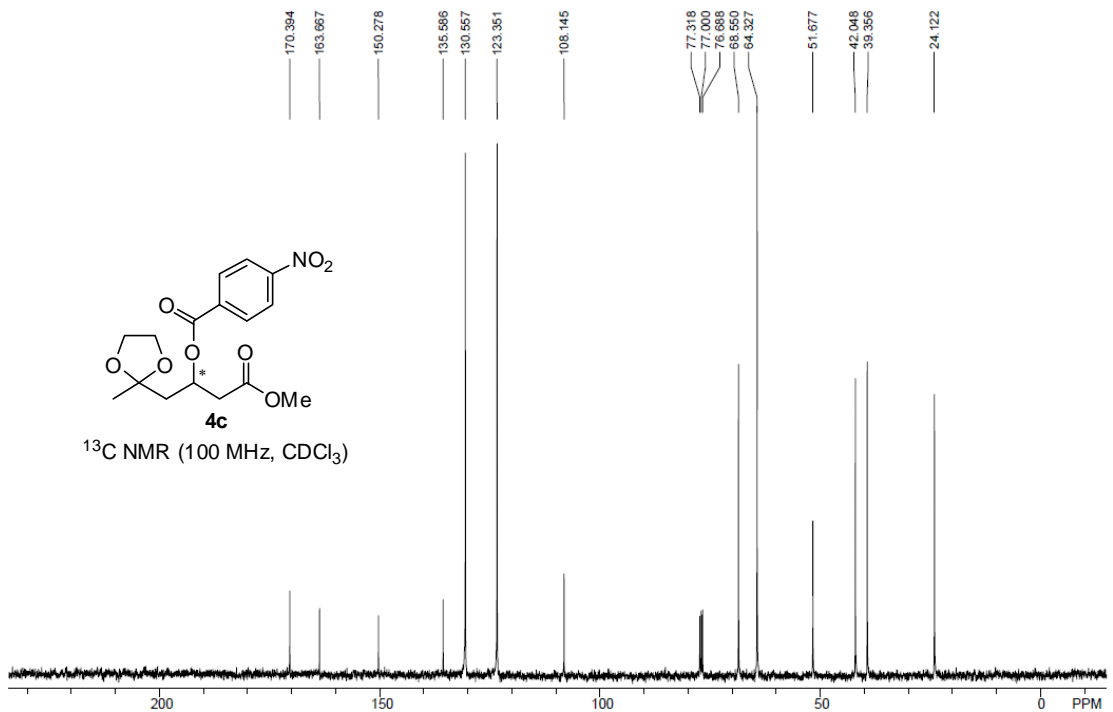



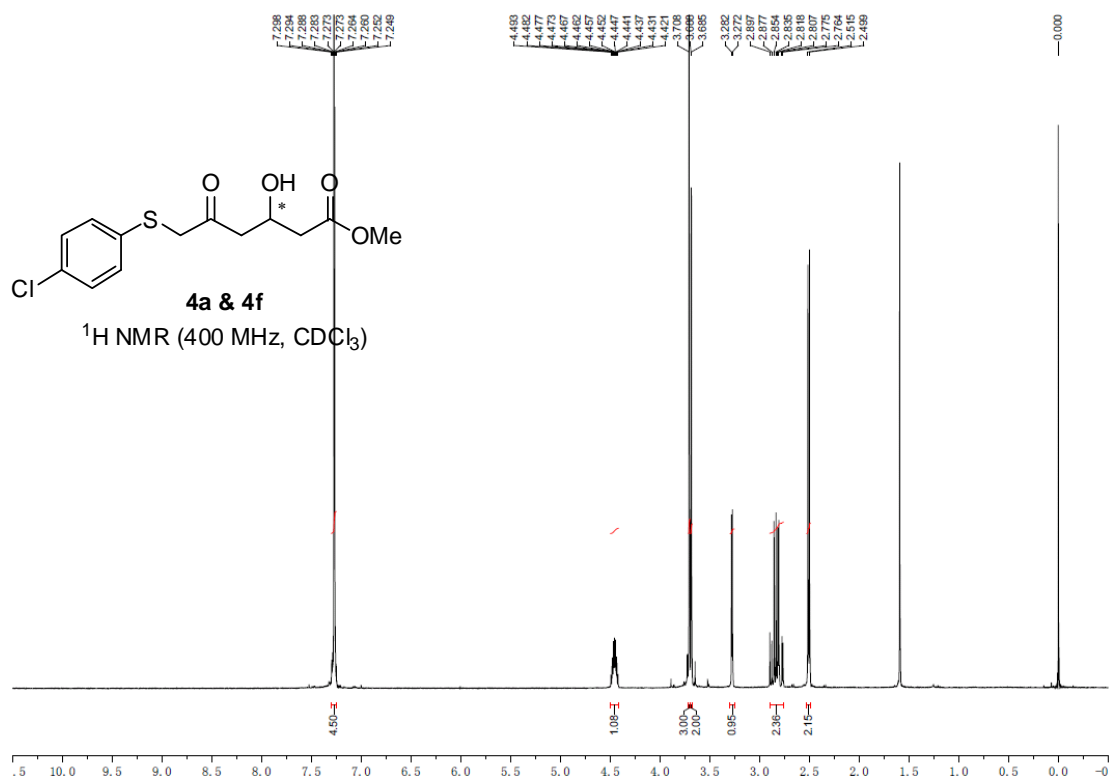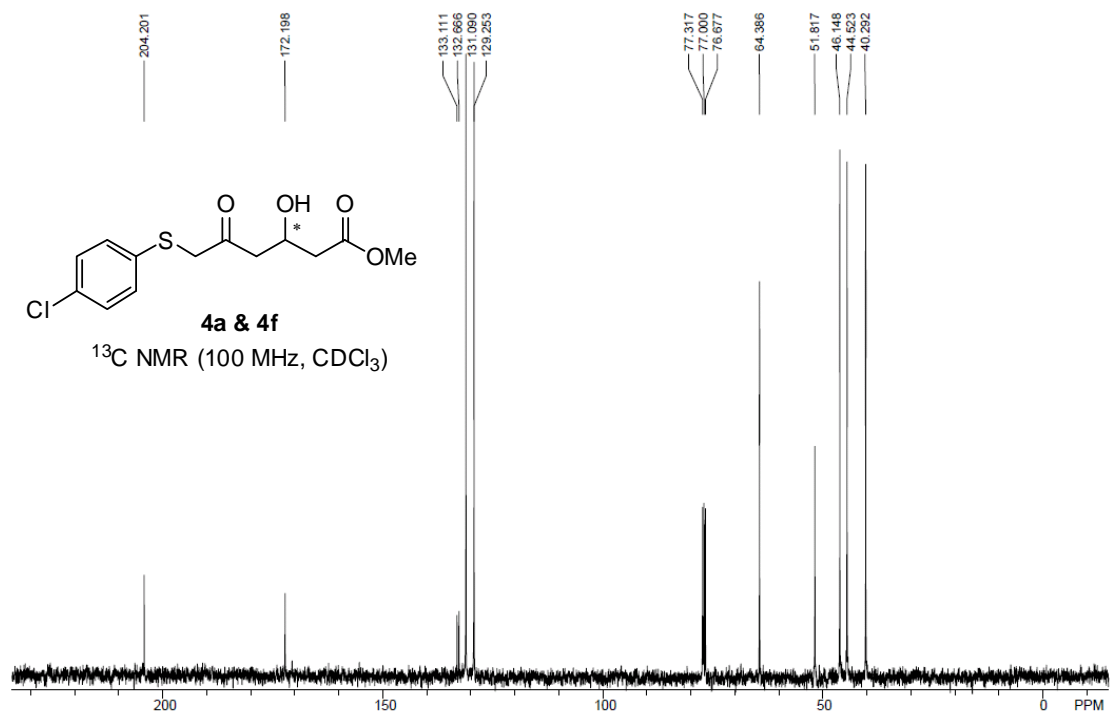

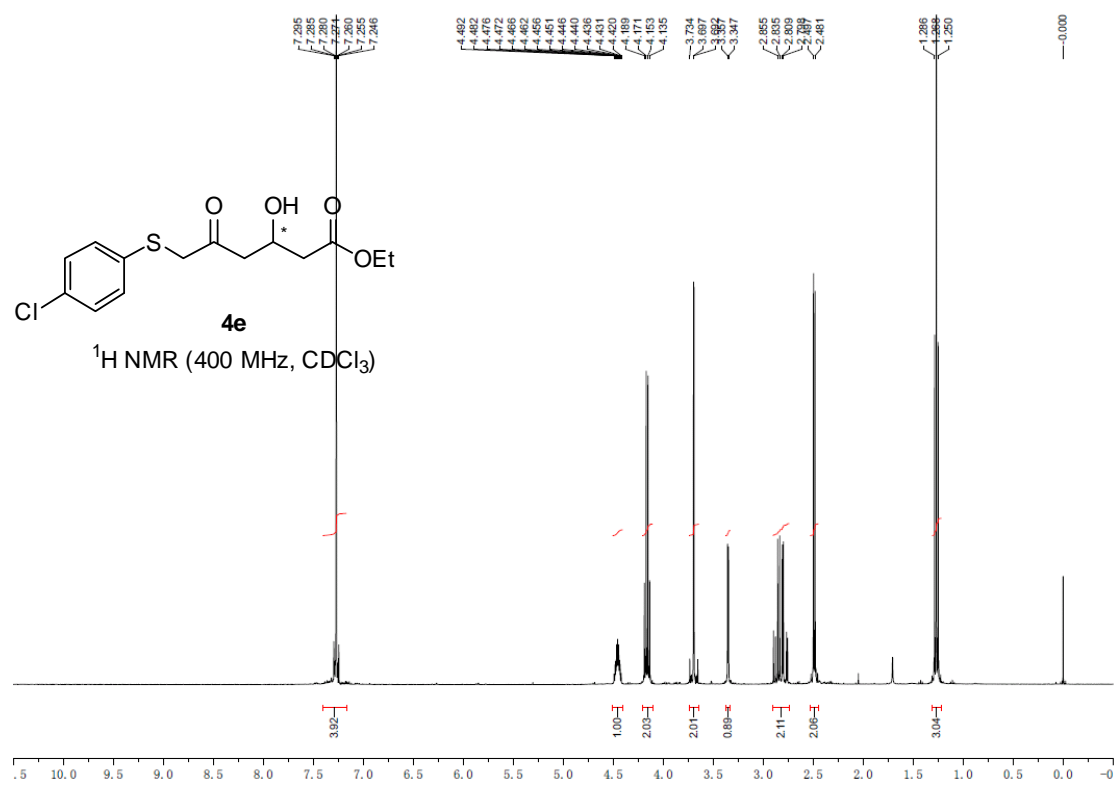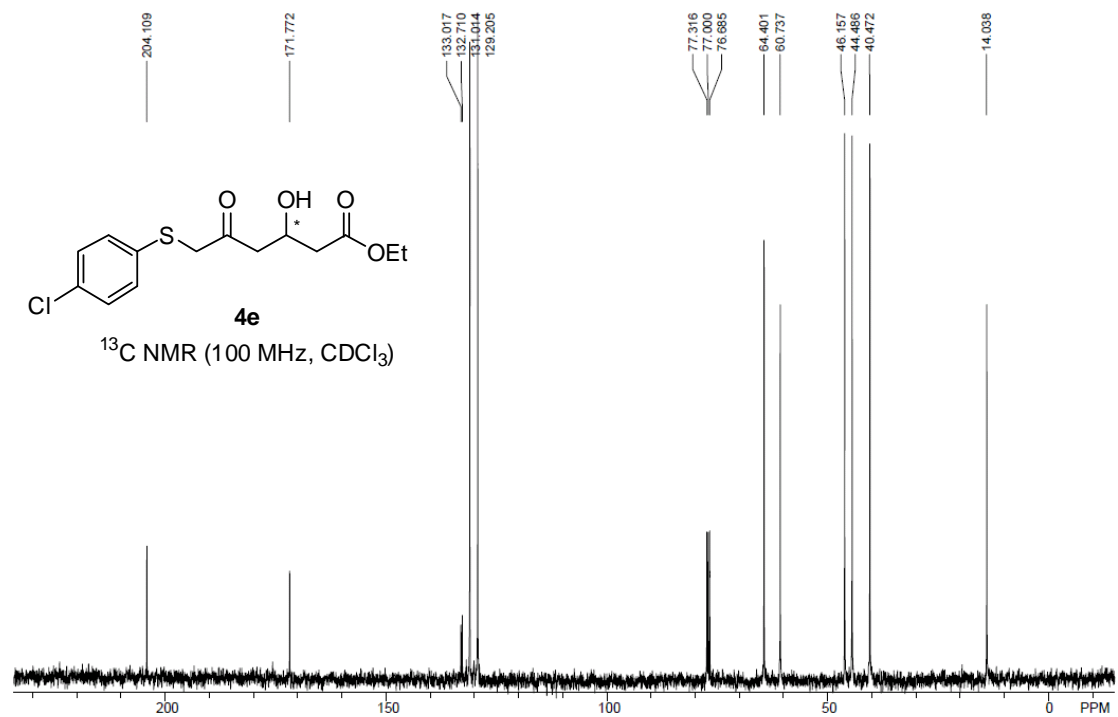

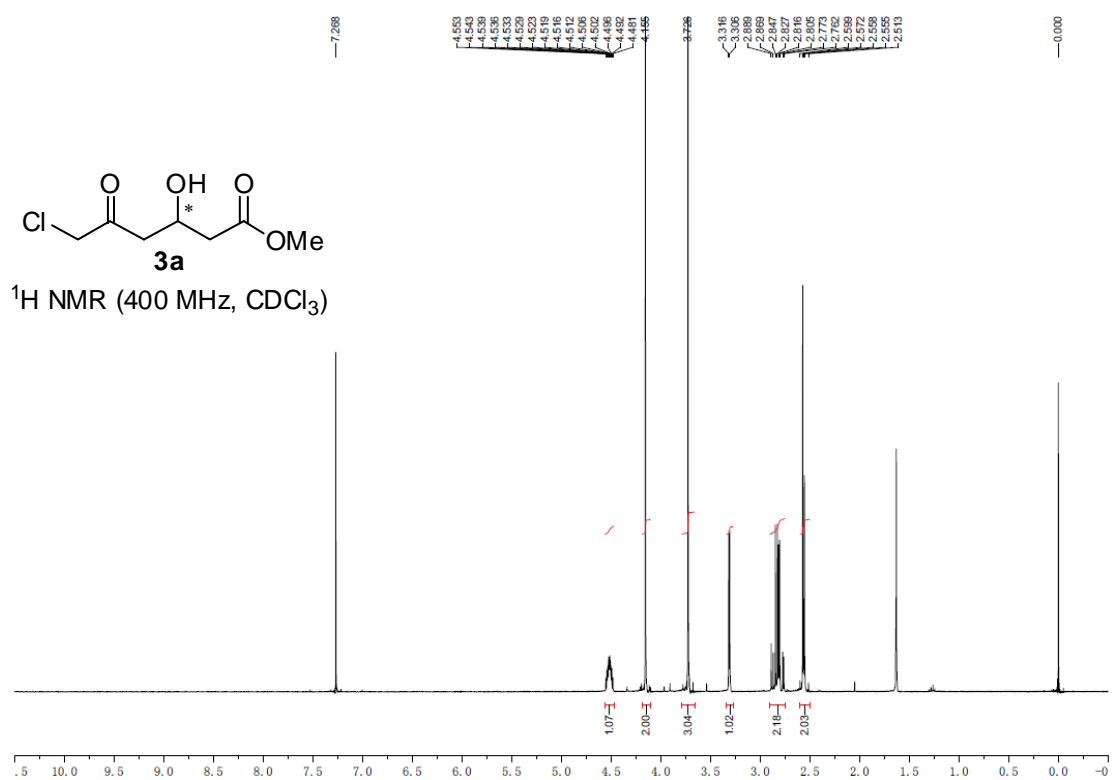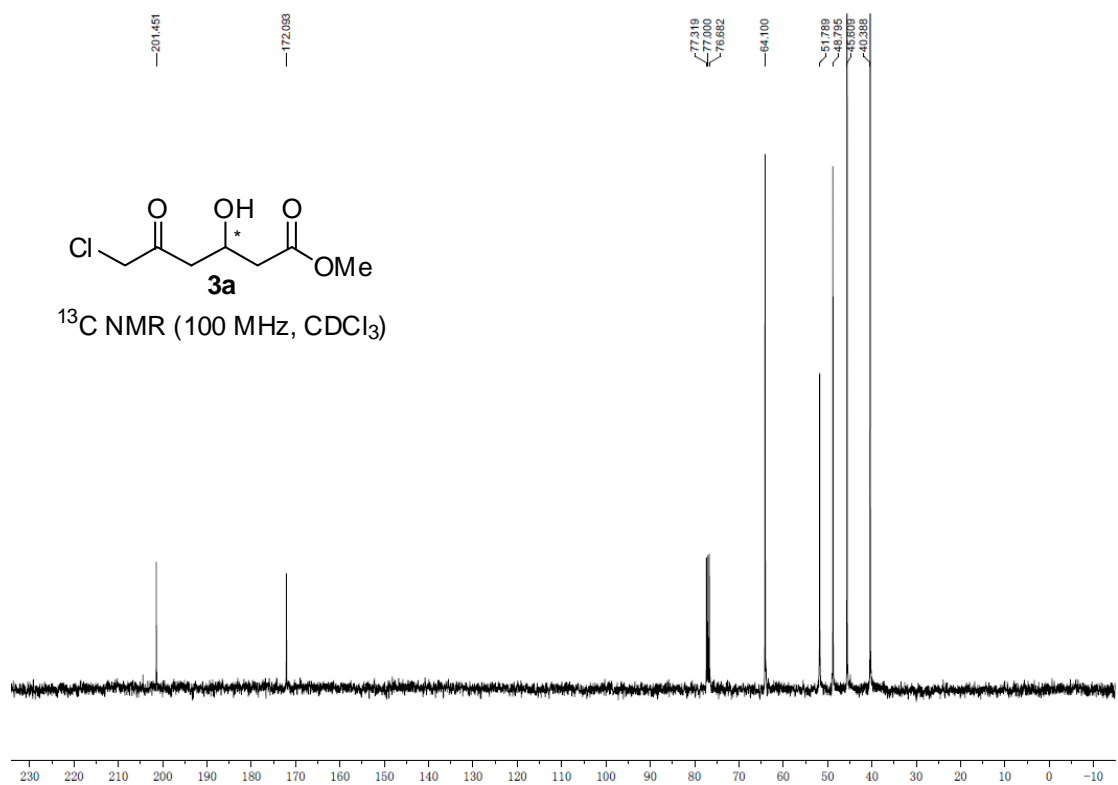



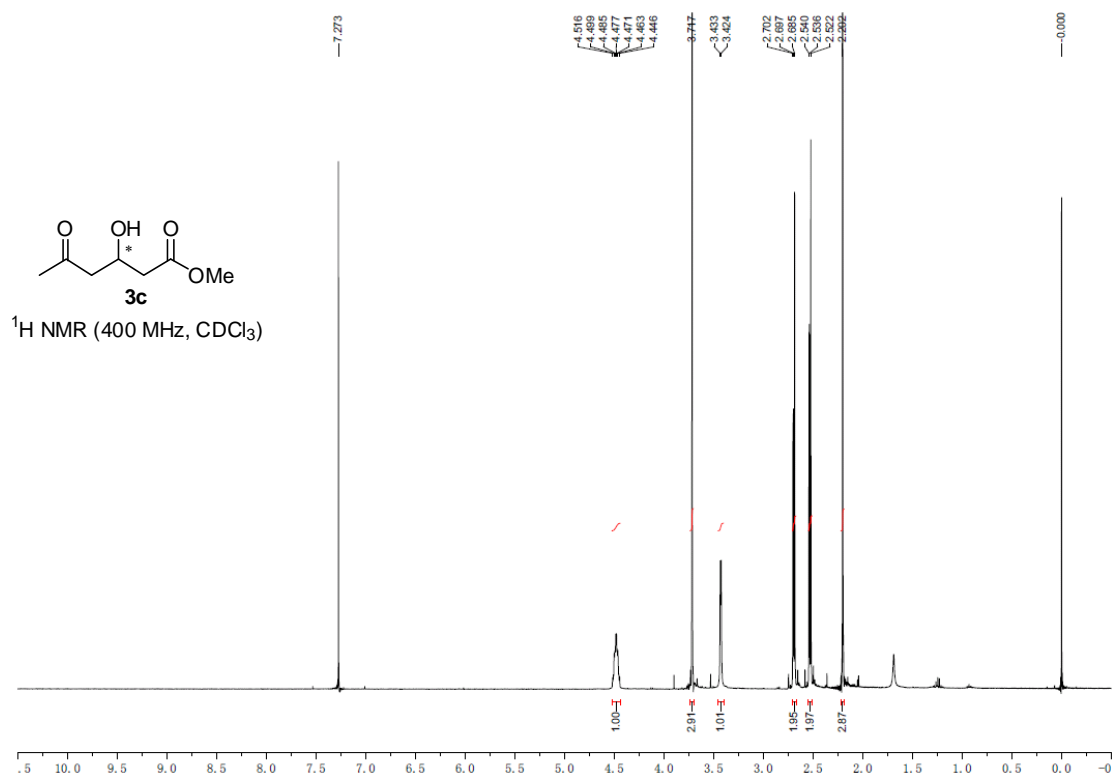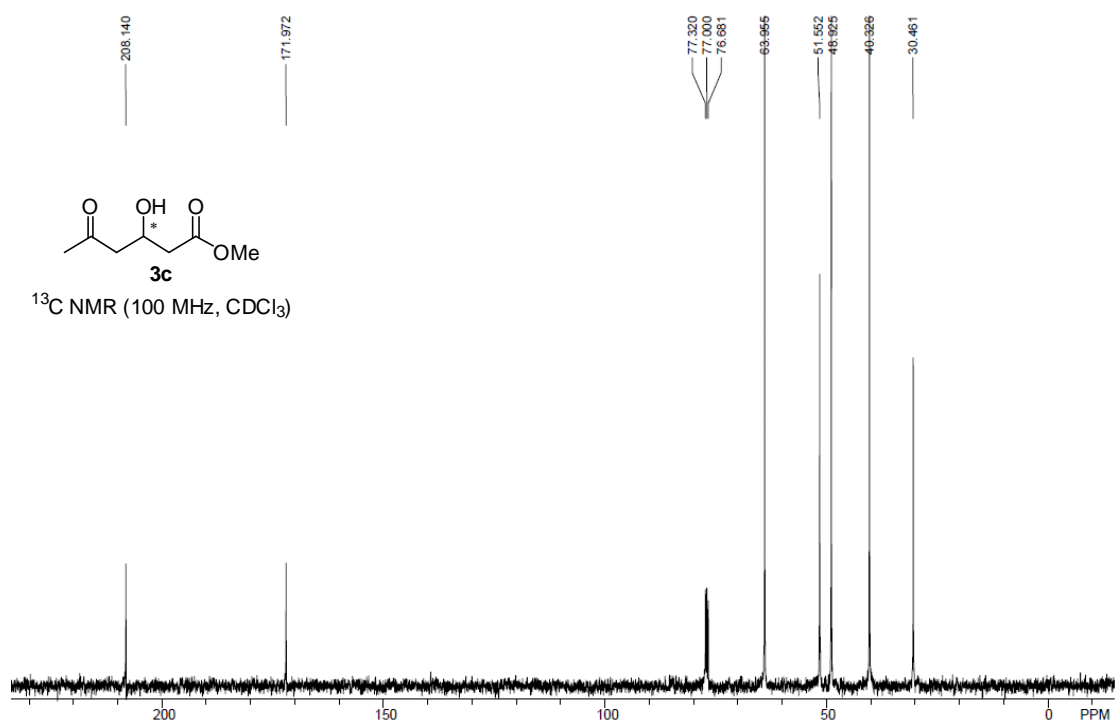

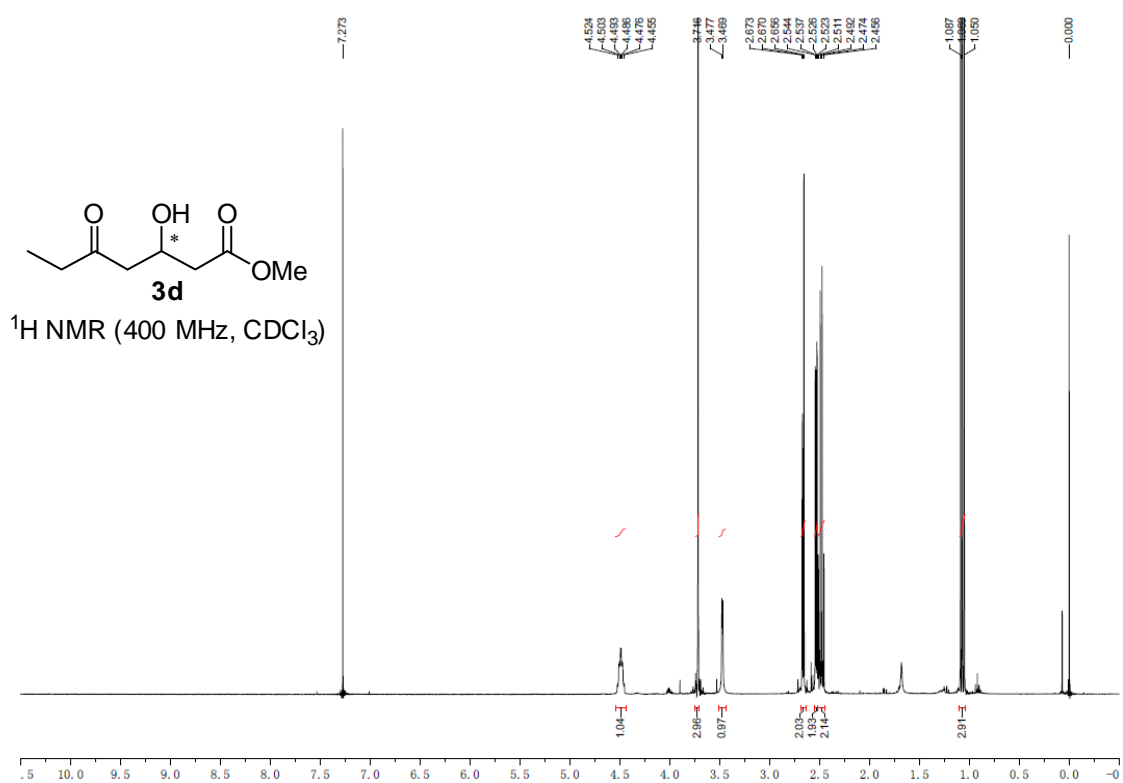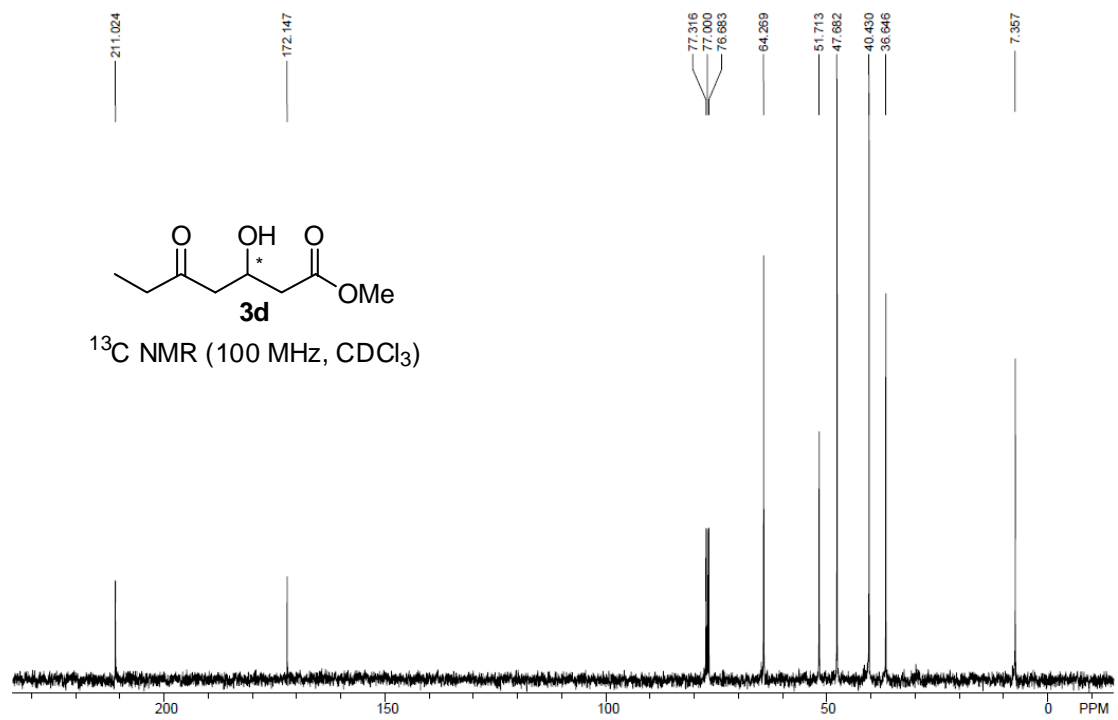

Supplement: c2cc31002c.pdf [file c2cc31002c.pdf]
